# Supplementary material for: Single-cell transcriptomics reveals shared immunosuppressive landscapes of mouse and human neuroblastoma
Source: J Immunother Cancer. 2022 Aug 5;10(8):e004807. doi: 10.1136/jitc-2022-004807 (PMC9362821; doi:10.1136/jitc-2022-004807)
Supplement: Supplementary data [file jitc-2022-004807supp003.xlsx]

## Sheet: Suppl Table 1
Supplementary Table 1: Characteristics of the 10 neuroblastoma patients studied by scRNA-seq.
Name	Identifier	Analyzed at diagnosis or relapse	Primary tumor at diagnosis	INSS Stage	Age at diagnosis (m)	Age at sample collection (m)	Gender	MYCN status (A or NA)	ALK status (A or NA)	Genomic profile (NCA or SCA)	Site of biopy for scRNA-seq	Histology	Patient status
TD2	NB1535	Diagnosis	adrenal (Right)	4S	8.23333	8.3	M	A	NA	SCA	adrenal (Right)	Stroma-poor, undifferentiated neuroblastoma. Low MKI.	Dead
TD3	NB1579	Diagnosis	adrenal (Right)	4	133.667	133.667	M	A	NA	NCA	adrenal (Right)	Neuroblastic tumor. MKI not determined.	Alive
TD4	NB1572	Diagnosis	adrenal (Left)	4	77.7	77.7	M	NA	NA	SCA	adrenal (Left)	Stroma-poor, poorly differentiated neuroblastoma. Intermediate MKI.	Alive
TD5	NB1574	Diagnosis	mediastinum with retroperitoneal extension	M	18.6333	18.6333	F	NA	NA	NCA with atypical SCA	mediastinum (Left)	Stroma-poor, poorly differentiated neuroblastoma. Low MKI.	Alive
TD6	NB1576	Diagnosis	retroperitoneal (Left)	3	42.3	42.3	F	A	NA	SCA	retroperitoneal (Left)	Stroma-poor, poorly differentiated neuroblastoma. High MKI.	Alive
TR2	NB1534	Relapse	abdominopelvic	4S	4.23333	8.6	M	NA	NA	NCA	retroperitoneal	Neuroblastic tumor exhibiting post-chemotherapy modifications.	Alive
TR3	NB1484§	Relapse	retroperitoneal, pancreatic	4	181.233	212.267	M	NA	NA	SCA	cervical lymphadenopathy	Compatible with a stroma-poor, poorly differentiated neuroblastoma. Low MKI.	Alive
TR4	NB1508	Relapse	pre-renal (Right)	4	41.9	60.5	F	NA	NA	SCA	temporal fossa (Left)	Compatible with a poorly differentiated neuroblastoma.	Dead
TR5	NB1540	Relapse	adrenal (Right)	Localized	24.6333	36.5333	F	A	NA	SCA	lung	Compatible with a neuroblastoma.	Dead
TR6	NB1535	Relapse	adrenal (Right)	4S	8.3	17.5333	M	A	NA	SCA	iliac lymph node	Compatible with a stroma-poor, undifferentiated neuroblastoma.	Dead
m: months.
A: amplified; NA: non amplified.
NCA: Numerical chromosome Aberrations; SCA: Segmental Chromosome Aberrations.
MKI: Mitosis-Karyorrhexis Index
§: see Calvo C. et al, Ped Blood Cancer, 2019.

## Sheet: Suppl Table 2
Supplementary Table 2: Lists of genes that are up-regulated in the different clusters identified in the integration of three TH-MYCN mouse tumors analyzed by scRNA-seq.
p_val	avg_logFC	pct.1	pct.2	p_val_adj	cluster	gene
2.51e-114	0.45	0.94	0.62	3.82e-110	0	Tuba1a
1.45e-111	0.43	0.99	0.84	2.20e-107	0	H2afz
1.57e-89	0.4	0.7	0.37	2.39e-85	0	Stmn2
5.28e-87	0.38	0.92	0.66	8.05e-83	0	Mif
3.57e-68	0.37	0.78	0.54	5.44e-64	0	Atpif1
3.52e-64	0.36	0.69	0.44	5.36e-60	0	Ppp1r14b
2.10e-76	0.35	0.74	0.43	3.21e-72	0	Dut
3.63e-75	0.35	0.7	0.4	5.53e-71	0	Tubb2b
3.50e-71	0.33	0.68	0.37	5.33e-67	0	Tubb3
9.35e-67	0.33	0.85	0.66	1.42e-62	0	Ran
2.30e-60	0.33	0.78	0.54	3.51e-56	0	Nme1
1.22e-80	0.32	0.9	0.63	1.86e-76	0	Fabp5
2.04e-73	0.32	0.74	0.42	3.10e-69	0	Uchl1
1.82e-64	0.32	0.62	0.34	2.78e-60	0	Bex2
2.93e-62	0.32	0.77	0.54	4.47e-58	0	Ube2s
1.50e-55	0.32	0.7	0.46	2.29e-51	0	Fkbp3
1.33e-68	0.31	0.59	0.31	2.02e-64	0	Mycn
1.03e-62	0.31	0.61	0.34	1.57e-58	0	Ube2c
4.50e-73	0.3	0.82	0.5	6.86e-69	0	Peg10
2.32e-68	0.3	0.96	0.78	3.53e-64	0	Hmgb2
3.29e-54	0.3	0.77	0.55	5.01e-50	0	Prdx2
4.73e-51	0.3	0.75	0.52	7.20e-47	0	Hspd1
1.34e-66	0.29	0.94	0.73	2.04e-62	0	Tubb5
1.72e-60	0.29	0.53	0.27	2.62e-56	0	Bex1
5.70e-46	0.29	0.65	0.44	8.68e-42	0	Polr2f
9.97e-87	0.28	1	0.96	1.52e-82	0	Ptma
7.42e-66	0.28	0.99	0.87	1.13e-61	0	Npm1
5.14e-47	0.28	0.63	0.41	7.83e-43	0	Ndufab1
1.92e-44	0.28	0.73	0.51	2.93e-40	0	Snrpf
1.62e-40	0.28	0.68	0.49	2.46e-36	0	Ranbp1
2.19e-46	0.27	0.69	0.46	3.33e-42	0	Hmgn1
1.88e-45	0.27	0.74	0.54	2.86e-41	0	Pdap1
1.54e-59	0.26	0.97	0.85	2.34e-55	0	Hsp90aa1
1.76e-52	0.26	0.65	0.38	2.68e-48	0	Ccnd1
2.60e-52	0.26	0.52	0.28	3.96e-48	0	Ndn
1.10e-50	0.26	0.55	0.31	1.68e-46	0	Gm1673
1.29e-48	0.26	0.47	0.24	1.97e-44	0	Gap43
7.28e-46	0.26	0.63	0.39	1.11e-41	0	Nasp
4.02e-45	0.26	0.64	0.42	6.12e-41	0	Prmt1
3.53e-39	0.26	0.86	0.74	5.37e-35	0	Hint1
1.92e-59	0.25	0.61	0.32	2.93e-55	0	Nefl
3.63e-53	0.25	0.45	0.22	5.53e-49	0	H1fx
2.32e-40	0.25	0.65	0.44	3.53e-36	0	Cct3
2.60e-40	0.25	0.74	0.53	3.96e-36	0	Slc25a4
3.43e-43	0.24	0.73	0.48	5.22e-39	0	Stmn1
5.17e-41	0.24	0.57	0.35	7.88e-37	0	Bex3
6.01e-26	0.24	0.65	0.52	9.15e-22	0	Atp5g1
5.42e-43	0.23	0.52	0.29	8.25e-39	0	Nnat
5.79e-43	0.23	0.79	0.58	8.82e-39	0	Tuba1b
6.22e-32	0.23	0.77	0.64	9.48e-28	0	Anp32b
2.30e-31	0.23	0.66	0.48	3.50e-27	0	Cct7
2.87e-29	0.23	0.58	0.42	4.38e-25	0	Snrpd1
6.21e-39	0.22	0.45	0.25	9.46e-35	0	Ppa1
7.33e-33	0.22	0.87	0.76	1.12e-28	0	Ncl
2.28e-32	0.22	0.48	0.3	3.47e-28	0	Rnaseh2c
1.13e-28	0.22	0.8	0.68	1.73e-24	0	Hspe1
1.24e-27	0.22	0.67	0.53	1.89e-23	0	Tomm20
5.69e-41	0.21	0.97	0.89	8.67e-37	0	Gnas
4.13e-39	0.21	0.42	0.22	6.29e-35	0	Cenpv
2.79e-38	0.21	0.48	0.27	4.25e-34	0	Hmgb3
2.11e-31	0.21	0.54	0.35	3.21e-27	0	Fkbp4
1.99e-29	0.21	0.45	0.28	3.03e-25	0	Dctpp1
2.26e-27	0.21	0.87	0.76	3.44e-23	0	Eif4a1
6.63e-26	0.21	0.87	0.8	1.01e-21	0	Cox7c
2.44e-35	0.2	0.45	0.26	3.71e-31	0	Pclaf
6.53e-29	0.2	0.84	0.74	9.94e-25	0	Eif5a
1.33e-27	0.2	0.84	0.7	2.03e-23	0	Set
1.27e-26	0.2	0.85	0.74	1.94e-22	0	Atp5b
7.49e-25	0.2	0.53	0.37	1.14e-20	0	Mrps33
4.20e-24	0.2	0.51	0.37	6.40e-20	0	Ndufa5
8.93e-24	0.2	0.61	0.46	1.36e-19	0	Atp5o.1
7.21e-22	0.2	0.47	0.33	1.10e-17	0	Timm8b
3.14e-38	0.19	0.7	0.47	4.78e-34	0	Basp1
9.24e-33	0.19	0.44	0.25	1.41e-28	0	Birc5
7.85e-30	0.19	0.51	0.32	1.20e-25	0	Hist1h1b
9.11e-30	0.19	0.48	0.3	1.39e-25	0	Glrx5
1.43e-28	0.19	0.53	0.34	2.17e-24	0	Hist1h4d
3.78e-28	0.19	0.45	0.28	5.76e-24	0	Mrpl12
5.58e-27	0.19	0.51	0.34	8.50e-23	0	C1qbp
4.95e-26	0.19	0.44	0.28	7.54e-22	0	Cdk4
1.63e-23	0.19	0.55	0.4	2.49e-19	0	U2af1
9.42e-23	0.19	0.65	0.5	1.43e-18	0	Pebp1
6.33e-36	0.18	0.41	0.22	9.64e-32	0	Tfap2b
1.26e-28	0.18	0.51	0.32	1.92e-24	0	Map1b
7.25e-27	0.18	0.46	0.29	1.11e-22	0	Nhp2
5.69e-24	0.18	0.92	0.82	8.67e-20	0	Ybx1
1.67e-21	0.18	0.44	0.3	2.54e-17	0	Chchd1
7.97e-21	0.18	0.56	0.41	1.21e-16	0	Timm13
1.53e-20	0.18	0.84	0.74	2.33e-16	0	Serbp1
4.27e-18	0.18	0.65	0.52	6.50e-14	0	Snrpd2
1.51e-33	0.17	0.99	0.95	2.31e-29	0	Hsp90ab1
9.73e-33	0.17	0.56	0.35	1.48e-28	0	Dlk1
1.65e-25	0.17	0.48	0.3	2.51e-21	0	Nefm
6.66e-25	0.17	0.48	0.31	1.02e-20	0	Selenoh
2.51e-24	0.17	0.41	0.26	3.82e-20	0	Ptov1
6.74e-24	0.17	0.42	0.27	1.03e-19	0	Mrpl34
3.03e-22	0.17	0.88	0.81	4.61e-18	0	Chchd2
5.03e-22	0.17	0.36	0.22	7.66e-18	0	Ppid
2.49e-21	0.17	0.45	0.31	3.80e-17	0	Uqcc2
3.83e-18	0.17	0.52	0.38	5.83e-14	0	Psmb6
4.76e-18	0.17	0.5	0.37	7.26e-14	0	Cacybp
5.26e-17	0.17	0.46	0.33	8.01e-13	0	Eif3g
2.95e-29	0.16	0.42	0.24	4.50e-25	0	Rtn1
3.59e-27	0.16	0.32	0.17	5.47e-23	0	Rfc4
1.97e-25	0.16	0.31	0.17	3.00e-21	0	Bex4
1.20e-22	0.16	0.38	0.23	1.82e-18	0	Tubb2a
2.89e-22	0.16	0.42	0.26	4.40e-18	0	Srm
2.41e-21	0.16	0.46	0.31	3.68e-17	0	Bzw2
9.09e-18	0.16	0.8	0.71	1.38e-13	0	Eef1g
4.74e-17	0.16	0.58	0.45	7.22e-13	0	Cct8
4.57e-16	0.16	0.7	0.59	6.96e-12	0	Psma7
5.42e-16	0.16	0.72	0.62	8.26e-12	0	Sumo2
4.97e-15	0.16	0.84	0.74	7.57e-11	0	AY036118
1.32e-14	0.16	0.47	0.36	2.01e-10	0	Ndufs5
7.60e-14	0.16	0.64	0.56	1.16e-09	0	Cox7a2
2.58e-13	0.16	0.65	0.57	3.93e-09	0	Snrpe
2.32e-12	0.16	0.55	0.45	3.53e-08	0	Usmg5
5.31e-28	0.15	0.64	0.43	8.10e-24	0	Nedd4
1.27e-26	0.15	0.4	0.23	1.94e-22	0	Elavl3
7.64e-26	0.15	0.36	0.2	1.16e-21	0	Cdk1
3.99e-25	0.15	0.28	0.14	6.09e-21	0	Ttc9b
2.63e-22	0.15	0.43	0.28	4.01e-18	0	Clpb
4.55e-18	0.15	0.4	0.27	6.93e-14	0	Txnl4a
1.97e-17	0.15	0.83	0.76	3.00e-13	0	Hmgb1
4.30e-17	0.15	0.41	0.29	6.56e-13	0	Impdh2
6.55e-17	0.15	0.49	0.35	9.98e-13	0	Pdcd5
2.36e-16	0.15	0.53	0.4	3.60e-12	0	Snu13
1.57e-14	0.15	0.63	0.53	2.39e-10	0	Cct5
3.46e-14	0.15	0.85	0.8	5.27e-10	0	Atp5e
2.59e-30	0.22	0.97	0.85	3.95e-26	1	H2afz
8.85e-25	0.21	0.86	0.65	1.35e-20	1	Tuba1a
1.42e-18	0.15	0.95	0.88	2.16e-14	1	Npm1
3.20e-128	0.94	0.91	0.51	4.87e-124	2	Peg10
2.13e-107	0.74	0.87	0.48	3.25e-103	2	Stmn1
1.15e-121	0.72	0.98	0.75	1.74e-117	2	Tubb5
2.66e-99	0.69	0.74	0.34	4.05e-95	2	Nefl
2.49e-102	0.68	0.91	0.59	3.80e-98	2	Tuba1b
9.57e-96	0.65	0.98	0.8	1.46e-91	2	Hmgb2
1.36e-88	0.61	0.67	0.3	2.06e-84	2	Nefm
1.53e-74	0.61	0.93	0.76	2.33e-70	2	Ncl
6.90e-91	0.6	0.95	0.65	1.05e-86	2	Tuba1a
1.81e-113	0.59	1	0.96	2.76e-109	2	Ptma
5.36e-83	0.58	0.8	0.44	8.16e-79	2	Uchl1
1.42e-80	0.57	0.75	0.4	2.16e-76	2	Ccnd1
9.02e-77	0.57	0.98	0.86	1.37e-72	2	Hsp90aa1
3.28e-85	0.55	0.76	0.39	5.00e-81	2	Tubb3
4.33e-77	0.55	0.71	0.35	6.60e-73	2	Ube2c
1.20e-65	0.55	0.92	0.76	1.83e-61	2	Hmgb1
7.07e-80	0.54	0.99	0.88	1.08e-75	2	Npm1
7.11e-74	0.54	0.89	0.71	1.08e-69	2	Set
6.41e-69	0.53	0.56	0.23	9.76e-65	2	Top2a
7.17e-82	0.52	0.82	0.45	1.09e-77	2	Dut
4.63e-73	0.52	0.77	0.43	7.05e-69	2	Nedd4
5.14e-68	0.52	0.67	0.33	7.84e-64	2	Mycn
3.22e-78	0.51	0.78	0.41	4.91e-74	2	Tubb2b
9.17e-74	0.51	0.74	0.4	1.40e-69	2	Nasp
1.83e-59	0.5	0.71	0.4	2.79e-55	2	Stmn2
3.31e-61	0.48	0.86	0.64	5.04e-57	2	Anp32b
5.73e-55	0.48	0.68	0.4	8.73e-51	2	Nucks1
3.52e-64	0.47	0.84	0.55	5.36e-60	2	Ube2s
1.00e-63	0.47	0.79	0.5	1.53e-59	2	Ranbp1
4.87e-63	0.47	0.87	0.67	7.42e-59	2	Ran
3.90e-60	0.47	0.84	0.54	5.94e-56	2	Pdap1
2.46e-50	0.47	0.98	0.9	3.74e-46	2	Gnas
2.49e-41	0.47	0.65	0.42	3.79e-37	2	Cbx3
6.57e-60	0.46	0.78	0.47	1.00e-55	2	Hmgn1
2.47e-49	0.46	0.82	0.63	3.76e-45	2	Ywhae
7.19e-72	0.45	1	0.96	1.10e-67	2	Hsp90ab1
2.35e-55	0.45	0.8	0.54	3.57e-51	2	Hspd1
9.22e-47	0.45	0.74	0.49	1.40e-42	2	Dek
1.03e-76	0.44	0.64	0.28	1.57e-72	2	Hmgb3
4.28e-62	0.44	0.57	0.26	6.52e-58	2	Pclaf
1.97e-51	0.44	0.92	0.74	3.01e-47	2	Serbp1
9.82e-58	0.43	0.52	0.22	1.50e-53	2	Tfap2b
2.97e-55	0.43	0.82	0.54	4.53e-51	2	Slc25a4
1.40e-52	0.43	0.46	0.19	2.13e-48	2	Sox11
1.69e-51	0.43	0.82	0.56	2.58e-47	2	Prdx2
4.94e-45	0.43	0.75	0.48	7.52e-41	2	Basp1
1.78e-44	0.43	0.59	0.33	2.71e-40	2	Map1b
1.95e-51	0.42	0.82	0.56	2.97e-47	2	Nme1
8.82e-47	0.42	0.43	0.18	1.34e-42	2	Cenpf
1.92e-45	0.42	0.89	0.68	2.92e-41	2	Mif
1.23e-55	0.41	0.68	0.36	1.87e-51	2	Bex2
3.55e-53	0.41	0.52	0.23	5.41e-49	2	Elavl3
4.15e-51	0.41	0.75	0.5	6.32e-47	2	Pebp1
2.41e-46	0.41	0.89	0.75	3.67e-42	2	Atp5b
1.81e-49	0.4	0.73	0.45	2.76e-45	2	Cct3
1.20e-39	0.4	0.68	0.45	1.82e-35	2	Hnrnpab
8.28e-49	0.39	0.92	0.77	1.26e-44	2	Eif4a1
1.04e-45	0.39	0.78	0.55	1.58e-41	2	Cct2
5.25e-45	0.39	0.9	0.74	7.99e-41	2	Eif5a
2.69e-42	0.39	0.76	0.53	4.10e-38	2	Snrpf
4.45e-60	0.38	0.47	0.18	6.78e-56	2	Phox2b
8.06e-56	0.38	0.93	0.65	1.23e-51	2	Fabp5
3.80e-51	0.38	0.66	0.36	5.79e-47	2	Fkbp4
7.00e-49	0.38	0.7	0.42	1.07e-44	2	Snrpd1
8.14e-47	0.38	0.85	0.66	1.24e-42	2	Srsf3
2.06e-42	0.38	0.89	0.78	3.14e-38	2	Calm2
1.74e-32	0.38	0.61	0.36	2.65e-28	2	Dlk1
2.44e-30	0.38	0.83	0.72	3.72e-26	2	Hnrnpa2b1
8.89e-60	0.37	0.54	0.23	1.36e-55	2	H1fx
6.08e-46	0.37	0.71	0.43	9.27e-42	2	Prmt1
1.25e-45	0.37	0.98	0.85	1.90e-41	2	H2afz
2.69e-45	0.37	0.75	0.48	4.10e-41	2	Fkbp3
4.35e-39	0.37	0.67	0.42	6.63e-35	2	Tcp1
7.72e-36	0.37	0.75	0.57	1.18e-31	2	Hnrnpa1
8.84e-27	0.37	0.71	0.55	1.35e-22	2	Hnrnpu
4.70e-25	0.37	0.53	0.34	7.16e-21	2	Hist1h1b
7.56e-57	0.36	0.46	0.18	1.15e-52	2	Rrm2
3.28e-51	0.36	0.5	0.22	5.00e-47	2	Mcm7
4.75e-47	0.36	0.54	0.26	7.24e-43	2	Birc5
8.97e-45	0.36	0.73	0.44	1.37e-40	2	Tcf4
7.16e-44	0.36	0.74	0.49	1.09e-39	2	Cct7
1.29e-40	0.36	0.55	0.3	1.96e-36	2	Ndn
6.15e-40	0.36	0.8	0.55	9.37e-36	2	Atpif1
5.07e-34	0.36	0.69	0.46	7.73e-30	2	Ppp1r14b
8.81e-32	0.36	0.53	0.3	1.34e-27	2	Smc4
2.23e-46	0.35	0.46	0.2	3.39e-42	2	Cdk1
5.30e-24	0.35	0.66	0.52	8.07e-20	2	Nap1l1
1.09e-40	0.34	0.56	0.31	1.67e-36	2	Psip1
3.12e-40	0.34	0.57	0.3	4.76e-36	2	Cks2
3.00e-33	0.34	0.93	0.83	4.58e-29	2	Ybx1
3.85e-45	0.33	0.52	0.25	5.87e-41	2	Smarcc1
1.25e-41	0.33	0.52	0.27	1.91e-37	2	Srm
2.67e-37	0.33	0.59	0.34	4.06e-33	2	Cdv3
2.99e-33	0.33	0.62	0.38	4.55e-29	2	Hnrnpd
3.74e-24	0.33	0.74	0.6	5.70e-20	2	Eif4g2
1.94e-36	0.32	0.5	0.26	2.96e-32	2	Gap43
2.06e-35	0.32	0.52	0.28	3.14e-31	2	Impdh2
6.05e-35	0.32	0.64	0.42	9.21e-31	2	Mdh2
2.37e-33	0.32	0.6	0.37	3.62e-29	2	Bex3
1.90e-31	0.32	0.57	0.35	2.90e-27	2	G3bp1
7.88e-31	0.32	0.85	0.71	1.20e-26	2	Eef1g
1.70e-30	0.32	0.53	0.31	2.59e-26	2	Nudc
4.40e-30	0.32	0.99	0.93	6.70e-26	2	Ppia
1.80e-28	0.32	0.77	0.62	2.75e-24	2	Sumo2
9.83e-27	0.32	0.77	0.63	1.50e-22	2	Hnrnpk
4.79e-24	0.32	0.47	0.29	7.29e-20	2	Rdx
4.40e-48	0.31	0.38	0.14	6.70e-44	2	Hlf
1.37e-45	0.31	0.46	0.2	2.08e-41	2	Hand2
1.80e-42	0.31	0.47	0.22	2.74e-38	2	Isl1
6.87e-36	0.31	0.52	0.28	1.05e-31	2	Supt16
2.86e-35	0.31	0.52	0.28	4.35e-31	2	Sms
3.54e-34	0.31	0.52	0.29	5.39e-30	2	Tubb4b
1.45e-31	0.31	0.67	0.45	2.21e-27	2	Cct8
1.91e-27	0.31	0.57	0.36	2.91e-23	2	Ptges3
1.70e-22	0.31	0.7	0.55	2.58e-18	2	Hnrnpa3
6.78e-46	0.3	0.44	0.18	1.03e-41	2	Cdc20
6.98e-45	0.3	0.41	0.17	1.06e-40	2	Cdca8
3.76e-42	0.3	0.4	0.17	5.72e-38	2	Insm2
9.76e-37	0.3	0.42	0.19	1.49e-32	2	Smc2
9.49e-36	0.3	0.55	0.29	1.45e-31	2	Bex1
8.92e-35	0.3	0.88	0.75	1.36e-30	2	Hint1
2.09e-32	0.3	0.57	0.33	3.18e-28	2	Gm1673
1.09e-30	0.3	0.6	0.38	1.66e-26	2	Srsf7
2.05e-30	0.3	0.53	0.31	3.13e-26	2	Bzw2
1.57e-29	0.3	0.57	0.36	2.39e-25	2	Atxn7l3b
2.18e-29	0.3	0.93	0.81	3.31e-25	2	Chchd2
4.78e-29	0.3	0.54	0.32	7.28e-25	2	Ttc3
1.24e-27	0.3	0.81	0.64	1.89e-23	2	Eif2s2
9.46e-27	0.3	0.69	0.53	1.44e-22	2	Cct5
5.63e-26	0.3	0.81	0.68	8.57e-22	2	Dynll1
6.17e-21	0.3	0.27	0.12	9.39e-17	2	Hist1h2ap
6.69e-46	0.29	0.39	0.15	1.02e-41	2	Ina
1.40e-36	0.29	0.44	0.21	2.13e-32	2	Apex1
1.87e-32	0.29	0.51	0.29	2.85e-28	2	Cdk4
1.67e-31	0.29	0.63	0.4	2.55e-27	2	U2af1
5.36e-30	0.29	0.66	0.45	8.17e-26	2	Polr2f
1.25e-28	0.29	0.48	0.28	1.91e-24	2	Pa2g4
1.30e-27	0.29	0.62	0.41	1.98e-23	2	Ssb
7.07e-27	0.29	0.73	0.52	1.08e-22	2	Atp5g1
1.09e-24	0.29	0.56	0.36	1.66e-20	2	Vcp
1.06e-22	0.29	0.69	0.54	1.62e-18	2	Jpt1
6.69e-39	0.28	0.47	0.22	1.02e-34	2	Cald1
7.09e-37	0.28	0.47	0.24	1.08e-32	2	Tubb2a
2.53e-33	0.28	0.43	0.21	3.85e-29	2	Anp32e
1.63e-32	0.28	0.58	0.34	2.48e-28	2	C1qbp
4.26e-30	0.28	0.59	0.37	6.48e-26	2	Glrx3
5.41e-30	0.28	0.57	0.35	8.25e-26	2	Hdgf
1.99e-29	0.28	0.6	0.38	3.03e-25	2	Cct4
2.79e-25	0.28	0.56	0.36	4.25e-21	2	Smarca5
3.71e-25	0.28	0.6	0.41	5.65e-21	2	Snu13
1.80e-24	0.28	0.67	0.47	2.74e-20	2	Atp5o.1
2.62e-21	0.28	0.76	0.63	4.00e-17	2	Rbm3
3.12e-21	0.28	0.56	0.39	4.75e-17	2	Metap2
2.91e-20	0.28	0.59	0.42	4.43e-16	2	Sfpq
1.46e-14	0.28	0.63	0.53	2.22e-10	2	Hnrnpa0
2.13e-45	0.27	0.32	0.11	3.25e-41	2	Fscn1
3.87e-42	0.27	0.41	0.17	5.89e-38	2	Bex4
2.39e-37	0.27	0.39	0.17	3.64e-33	2	Mllt11
6.81e-28	0.27	0.54	0.33	1.04e-23	2	Eid1
3.22e-27	0.27	0.48	0.28	4.90e-23	2	Rnf187
2.62e-26	0.27	0.5	0.3	3.99e-22	2	Vdac1
1.03e-24	0.27	0.56	0.37	1.57e-20	2	Sf3b2
1.29e-24	0.27	0.62	0.43	1.97e-20	2	Ndufab1
1.22e-23	0.27	0.61	0.42	1.86e-19	2	Park7
4.62e-23	0.27	0.7	0.53	7.03e-19	2	Snrpd2
2.16e-22	0.27	0.44	0.26	3.29e-18	2	Rtn1
2.23e-22	0.27	0.48	0.3	3.40e-18	2	Hmgn2
1.60e-21	0.27	0.62	0.45	2.44e-17	2	Eif3c
4.43e-17	0.27	0.33	0.19	6.75e-13	2	Mki67
3.66e-52	0.26	0.29	0.08	5.58e-48	2	Nusap1
1.26e-37	0.26	0.38	0.16	1.92e-33	2	Eef1a2
3.29e-35	0.26	0.36	0.15	5.01e-31	2	Ccnb1
6.55e-34	0.26	0.34	0.15	9.99e-30	2	Dnmt1
7.92e-32	0.26	0.49	0.26	1.21e-27	2	Ptov1
2.86e-29	0.26	0.4	0.2	4.35e-25	2	Sox4
3.32e-29	0.26	0.48	0.26	5.05e-25	2	Ppa1
1.29e-28	0.26	0.5	0.29	1.96e-24	2	Dctpp1
2.56e-26	0.26	0.58	0.37	3.90e-22	2	Cacybp
6.98e-26	0.26	0.82	0.68	1.06e-21	2	Hspe1
1.01e-25	0.26	0.52	0.31	1.54e-21	2	Nnat
1.59e-24	0.26	0.62	0.43	2.42e-20	2	Psmb4
4.10e-24	0.26	0.58	0.38	6.24e-20	2	Ddx39b
1.02e-22	0.26	0.76	0.61	1.55e-18	2	Atp5a1
2.55e-22	0.26	0.47	0.29	3.89e-18	2	Nop58
1.32e-21	0.26	0.66	0.5	2.02e-17	2	Mrfap1
2.54e-20	0.26	0.44	0.27	3.88e-16	2	Pik3r1
6.02e-20	0.26	0.46	0.28	9.17e-16	2	Smc3
8.52e-18	0.26	0.51	0.36	1.30e-13	2	Hist1h4d
3.29e-45	0.25	0.33	0.11	5.01e-41	2	Pbk
2.45e-43	0.25	0.27	0.08	3.73e-39	2	Tpx2
2.65e-40	0.25	0.38	0.16	4.03e-36	2	Lig1
6.97e-34	0.25	0.43	0.2	1.06e-29	2	Rnps1
4.25e-27	0.25	0.44	0.24	6.48e-23	2	Ssrp1
9.05e-22	0.25	0.59	0.42	1.38e-17	2	Calm3
9.43e-22	0.25	0.5	0.32	1.44e-17	2	Glrx5
2.66e-17	0.25	0.58	0.44	4.05e-13	2	Hnrnpc
4.72e-41	0.24	0.37	0.14	7.19e-37	2	Crmp1
3.94e-40	0.24	0.36	0.14	6.01e-36	2	Ppp1r17
4.11e-35	0.24	0.47	0.23	6.26e-31	2	Lmnb1
2.54e-30	0.24	0.4	0.19	3.87e-26	2	Hdac2
6.59e-30	0.24	0.33	0.14	1.00e-25	2	Ddc
2.70e-29	0.24	0.41	0.2	4.12e-25	2	Cenpa
4.23e-28	0.24	0.4	0.2	6.45e-24	2	Ddx1
5.98e-27	0.24	0.42	0.22	9.12e-23	2	Mrpl28
9.21e-27	0.24	0.54	0.33	1.40e-22	2	Pfdn2
3.98e-26	0.24	0.38	0.19	6.07e-22	2	Cbx5
2.76e-22	0.24	0.44	0.27	4.21e-18	2	Csnk1e
3.48e-22	0.24	0.56	0.37	5.29e-18	2	Psma4
7.98e-22	0.24	0.48	0.3	1.22e-17	2	Mrpl12
2.92e-21	0.24	0.51	0.32	4.45e-17	2	Selenoh
5.74e-21	0.24	0.42	0.26	8.75e-17	2	Smarca4
1.64e-20	0.24	0.61	0.42	2.50e-16	2	Timm13
1.65e-18	0.24	0.44	0.27	2.51e-14	2	Rsl1d1
5.62e-16	0.24	0.63	0.51	8.56e-12	2	Snrpb
1.98e-13	0.24	0.63	0.52	3.01e-09	2	Top1
1.68e-55	0.23	0.28	0.07	2.56e-51	2	Kif11
2.91e-43	0.23	0.36	0.14	4.43e-39	2	Pfn2
9.19e-34	0.23	0.36	0.15	1.40e-29	2	Plcb4
2.64e-32	0.23	0.42	0.2	4.02e-28	2	Alyref
1.06e-29	0.23	0.26	0.1	1.61e-25	2	Elavl4
1.03e-27	0.23	0.42	0.22	1.57e-23	2	Lyar
3.49e-26	0.23	0.41	0.21	5.32e-22	2	Cfl2
4.54e-25	0.23	0.5	0.3	6.92e-21	2	Psmc6
4.81e-25	0.23	0.46	0.26	7.33e-21	2	Hnrnpr
1.89e-24	0.23	0.4	0.21	2.87e-20	2	Cks1b
3.72e-24	0.23	0.54	0.34	5.66e-20	2	Eif3g
1.01e-22	0.23	0.54	0.34	1.53e-18	2	Timm8b
1.73e-20	0.23	0.56	0.37	2.64e-16	2	Romo1
1.79e-19	0.23	0.52	0.35	2.73e-15	2	Bzw1
4.37e-19	0.23	0.45	0.29	6.65e-15	2	Eif3d
4.67e-19	0.23	0.38	0.22	7.12e-15	2	Srsf1
5.04e-19	0.23	0.44	0.27	7.68e-15	2	Matr3
1.66e-18	0.23	0.52	0.36	2.53e-14	2	Eif4h
4.98e-16	0.23	0.7	0.57	7.58e-12	2	Eif5
5.71e-16	0.23	0.5	0.35	8.69e-12	2	Ndufv3
3.56e-14	0.23	0.7	0.6	5.42e-10	2	Psma7
1.13e-11	0.23	0.47	0.35	1.72e-07	2	Hist1h1e
5.33e-41	0.22	0.32	0.11	8.12e-37	2	Prox1
5.58e-35	0.22	0.29	0.11	8.50e-31	2	Mab21l2
9.42e-34	0.22	0.39	0.17	1.44e-29	2	Pcbp4
2.76e-27	0.22	0.42	0.22	4.21e-23	2	Zwint
1.70e-26	0.22	0.45	0.24	2.59e-22	2	Cenpv
6.43e-26	0.22	0.32	0.15	9.80e-22	2	Ezh2
9.44e-23	0.22	0.38	0.21	1.44e-18	2	Stip1
1.60e-22	0.22	0.44	0.25	2.44e-18	2	Smarce1
6.69e-22	0.22	0.47	0.28	1.02e-17	2	Psmc5
1.42e-21	0.22	0.53	0.34	2.16e-17	2	Phb2
2.81e-21	0.22	0.43	0.25	4.28e-17	2	Gspt1
6.25e-21	0.22	0.4	0.23	9.52e-17	2	Ppid
1.44e-20	0.22	0.48	0.3	2.20e-16	2	Fkbp1a
1.83e-20	0.22	0.33	0.17	2.80e-16	2	Brd3
5.02e-20	0.22	0.56	0.38	7.65e-16	2	Psmb5
6.48e-20	0.22	0.38	0.21	9.87e-16	2	Agtr2
8.45e-20	0.22	0.41	0.24	1.29e-15	2	Polr2m
2.70e-18	0.22	0.51	0.34	4.11e-14	2	Rbm8a
9.66e-18	0.22	0.91	0.81	1.47e-13	2	Eef2
2.31e-17	0.22	0.55	0.38	3.52e-13	2	Psma2
4.55e-17	0.22	0.69	0.54	6.93e-13	2	Tomm20
4.73e-17	0.22	0.46	0.3	7.20e-13	2	Caprin1
3.95e-16	0.22	0.72	0.62	6.01e-12	2	Atp5f1
7.63e-16	0.22	0.59	0.44	1.16e-11	2	Nop10
1.24e-15	0.22	0.51	0.34	1.90e-11	2	Chgb
2.70e-15	0.22	0.46	0.31	4.11e-11	2	Srsf2
6.18e-15	0.22	0.55	0.4	9.41e-11	2	Selenow
2.63e-38	0.21	0.28	0.1	4.01e-34	2	Kif21a
2.69e-31	0.21	0.33	0.14	4.10e-27	2	Zfp428
2.63e-30	0.21	0.29	0.12	4.01e-26	2	Khdrbs3
1.21e-27	0.21	0.26	0.1	1.85e-23	2	Rrm1
4.76e-27	0.21	0.33	0.15	7.26e-23	2	Dpysl2
2.43e-25	0.21	0.49	0.28	3.70e-21	2	Marcksl1
1.63e-24	0.21	0.37	0.19	2.48e-20	2	Nt5dc2
1.98e-24	0.21	0.47	0.27	3.02e-20	2	Cyc1
1.88e-23	0.21	0.33	0.16	2.86e-19	2	Hsph1
9.65e-23	0.21	0.39	0.21	1.47e-18	2	Ccdc34
3.05e-22	0.21	0.4	0.22	4.64e-18	2	Dynll2
4.18e-22	0.21	0.37	0.19	6.37e-18	2	H2afx
9.52e-20	0.21	0.46	0.28	1.45e-15	2	Gnl3
3.33e-19	0.21	0.48	0.31	5.08e-15	2	Nhp2
8.80e-19	0.21	0.38	0.22	1.34e-14	2	Bub3
9.01e-19	0.21	0.35	0.19	1.37e-14	2	Kpnb1
6.10e-17	0.21	0.38	0.23	9.30e-13	2	Rbbp4
1.17e-16	0.21	0.28	0.14	1.78e-12	2	Atad2
1.34e-16	0.21	0.56	0.4	2.04e-12	2	Ndufc2
4.26e-16	0.21	0.53	0.38	6.49e-12	2	Swi5
1.27e-15	0.21	0.38	0.23	1.93e-11	2	Ube3a
8.10e-15	0.21	0.75	0.63	1.23e-10	2	Sub1
1.64e-13	0.21	0.67	0.57	2.49e-09	2	Snrpe
8.07e-13	0.21	0.46	0.33	1.23e-08	2	Hnrnph1
1.32e-12	0.21	0.46	0.33	2.01e-08	2	Gnb1
2.00e-12	0.21	0.37	0.24	3.05e-08	2	Pbrm1
3.21e-12	0.21	0.49	0.36	4.89e-08	2	Hnrnpm
3.77e-12	0.21	0.54	0.42	5.74e-08	2	Anp32a
5.10e-11	0.21	0.57	0.45	7.77e-07	2	Usmg5
3.53e-34	0.2	0.33	0.13	5.38e-30	2	Spc24
1.48e-27	0.2	0.31	0.14	2.25e-23	2	H2afy2
2.35e-27	0.2	0.27	0.11	3.58e-23	2	Insm1
1.51e-26	0.2	0.32	0.14	2.29e-22	2	Grb10
2.05e-23	0.2	0.32	0.16	3.13e-19	2	Fam60a
2.31e-22	0.2	0.31	0.15	3.52e-18	2	Rangap1
6.17e-22	0.2	0.33	0.17	9.41e-18	2	Nsd2
1.91e-21	0.2	0.47	0.28	2.91e-17	2	Abcf1
3.87e-21	0.2	0.46	0.27	5.90e-17	2	Psmb7
4.31e-21	0.2	0.36	0.19	6.57e-17	2	Knop1
6.66e-21	0.2	0.34	0.18	1.01e-16	2	Pafah1b2
7.05e-21	0.2	0.37	0.2	1.07e-16	2	Stmn3
9.14e-21	0.2	0.35	0.19	1.39e-16	2	Trim28
1.34e-20	0.2	0.38	0.22	2.04e-16	2	Rcc2
1.36e-20	0.2	0.3	0.15	2.06e-16	2	Hells
4.16e-20	0.2	0.41	0.24	6.34e-16	2	Mrto4
7.26e-20	0.2	0.4	0.23	1.11e-15	2	Mpp6
1.34e-19	0.2	0.47	0.28	2.04e-15	2	Clpb
3.72e-19	0.2	0.5	0.32	5.66e-15	2	Fbl
7.56e-19	0.2	0.4	0.24	1.15e-14	2	Psmd13
1.83e-18	0.2	0.33	0.18	2.79e-14	2	Nolc1
3.99e-18	0.2	0.56	0.38	6.08e-14	2	Ndufa5
1.39e-17	0.2	0.56	0.39	2.12e-13	2	Psmb6
1.47e-17	0.2	0.5	0.33	2.23e-13	2	Lsm4
3.50e-17	0.2	0.56	0.38	5.33e-13	2	Mrps33
3.77e-17	0.2	0.42	0.26	5.74e-13	2	Ebna1bp2
1.74e-16	0.2	0.51	0.35	2.65e-12	2	Ywhaq
2.83e-16	0.2	0.34	0.2	4.31e-12	2	Ddx18
7.94e-16	0.2	0.3	0.16	1.21e-11	2	Mybbp1a
2.58e-15	0.2	0.44	0.29	3.94e-11	2	Zc3h15
9.08e-15	0.2	0.52	0.36	1.38e-10	2	Psmb3
1.15e-14	0.2	0.44	0.29	1.75e-10	2	Nono
2.09e-14	0.2	0.54	0.38	3.18e-10	2	Nol7
7.03e-14	0.2	0.36	0.22	1.07e-09	2	Fxr1
7.52e-14	0.2	0.36	0.23	1.15e-09	2	Lsm5
7.62e-14	0.2	0.38	0.24	1.16e-09	2	Gsk3b
2.62e-13	0.2	0.5	0.37	3.99e-09	2	Atp5g3
2.70e-13	0.2	0.9	0.82	4.11e-09	2	Naca
8.83e-13	0.2	0.65	0.55	1.34e-08	2	Atp5j
1.12e-12	0.2	0.45	0.32	1.70e-08	2	Llph
1.24e-12	0.2	0.43	0.29	1.89e-08	2	Smc6
2.31e-12	0.2	0.45	0.32	3.52e-08	2	1110004F10Rik
8.22e-12	0.2	0.69	0.6	1.25e-07	2	Atp5g2
3.52e-10	0.2	0.47	0.36	5.36e-06	2	Pcbp1
3.10e-30	0.19	0.25	0.09	4.72e-26	2	Pak3
3.56e-30	0.19	0.37	0.17	5.42e-26	2	Tipin
6.53e-29	0.19	0.26	0.1	9.95e-25	2	Ccnb2
1.06e-27	0.19	0.34	0.15	1.62e-23	2	Ttc9b
1.29e-27	0.19	0.25	0.1	1.96e-23	2	Ccna2
5.64e-26	0.19	0.3	0.13	8.59e-22	2	Pdxp
5.71e-26	0.19	0.27	0.11	8.70e-22	2	Zfp704
1.20e-25	0.19	0.33	0.15	1.82e-21	2	Lmo1
6.13e-24	0.19	0.34	0.16	9.34e-20	2	Acat1
1.05e-23	0.19	0.36	0.18	1.61e-19	2	Ruvbl1
1.41e-22	0.19	0.38	0.2	2.16e-18	2	Klhdc2
2.63e-21	0.19	0.38	0.2	4.00e-17	2	Pcm1
2.74e-21	0.19	0.35	0.18	4.18e-17	2	Rfc4
9.68e-21	0.19	0.37	0.2	1.48e-16	2	Uba2
1.84e-20	0.19	0.42	0.24	2.80e-16	2	Pfdn4
2.60e-20	0.19	0.36	0.2	3.96e-16	2	Lsm7
2.70e-20	0.19	0.34	0.18	4.11e-16	2	Mlf2
4.87e-20	0.19	0.33	0.17	7.42e-16	2	Psmc1
1.66e-19	0.19	0.42	0.24	2.54e-15	2	Snrpa1
3.80e-17	0.19	0.38	0.23	5.79e-13	2	Dnajc2
1.58e-16	0.19	0.32	0.18	2.40e-12	2	Rbbp7
1.62e-16	0.19	0.43	0.28	2.47e-12	2	Txnl1
3.25e-16	0.19	0.45	0.29	4.95e-12	2	Banf1
3.37e-16	0.19	0.39	0.24	5.14e-12	2	Cbx1
3.39e-16	0.19	0.42	0.27	5.16e-12	2	Suclg1
3.97e-16	0.19	0.41	0.26	6.05e-12	2	Anapc5
3.99e-16	0.19	0.3	0.16	6.08e-12	2	Larp1
1.69e-15	0.19	0.44	0.29	2.58e-11	2	Snrpd3
6.28e-15	0.19	0.4	0.25	9.57e-11	2	Syncrip
1.71e-14	0.19	0.37	0.23	2.61e-10	2	Dtymk
1.99e-14	0.19	0.54	0.4	3.03e-10	2	Eif3i
5.16e-14	0.19	0.42	0.28	7.87e-10	2	Mtch1
6.28e-14	0.19	0.67	0.53	9.57e-10	2	Rbx1
2.53e-13	0.19	0.85	0.76	3.86e-09	2	Btf3
1.48e-12	0.19	0.75	0.67	2.26e-08	2	Atp5j2
4.74e-08	0.19	0.36	0.27	7.21e-04	2	Ybx3
1.91e-32	0.18	0.26	0.09	2.91e-28	2	Phox2a
2.09e-27	0.18	0.28	0.12	3.18e-23	2	Mcm5
5.30e-27	0.18	0.26	0.1	8.08e-23	2	Hdgfl3
1.38e-26	0.18	0.26	0.1	2.10e-22	2	Celf4
2.71e-26	0.18	0.25	0.1	4.13e-22	2	Sytl4
1.16e-25	0.18	0.38	0.18	1.77e-21	2	Prpf19
5.57e-24	0.18	0.35	0.17	8.49e-20	2	Gars
1.24e-22	0.18	0.31	0.15	1.88e-18	2	Stmn4
4.17e-22	0.18	0.32	0.15	6.35e-18	2	Maged1
8.02e-22	0.18	0.34	0.17	1.22e-17	2	Gmnn
1.85e-21	0.18	0.33	0.16	2.81e-17	2	Gar1
4.57e-20	0.18	0.26	0.12	6.96e-16	2	Gkap1
4.88e-20	0.18	0.28	0.14	7.43e-16	2	Rpa3
1.78e-18	0.18	0.39	0.22	2.71e-14	2	Odc1
1.12e-17	0.18	0.34	0.19	1.70e-13	2	Pafah1b3
2.49e-17	0.18	0.3	0.16	3.79e-13	2	Prc1
4.42e-17	0.18	0.28	0.15	6.74e-13	2	Myef2
5.28e-17	0.18	0.49	0.31	8.05e-13	2	Ak2
9.60e-17	0.18	0.44	0.28	1.46e-12	2	Mrpl18
6.00e-16	0.18	0.31	0.17	9.14e-12	2	Psmd1
7.78e-16	0.18	0.44	0.28	1.19e-11	2	Psmc2
1.08e-15	0.18	0.48	0.32	1.65e-11	2	Ndufv2
1.70e-15	0.18	0.4	0.25	2.59e-11	2	Snrpc
6.21e-15	0.18	0.43	0.28	9.45e-11	2	Rrp1
7.22e-15	0.18	0.41	0.26	1.10e-10	2	Ube2n
1.02e-14	0.18	0.46	0.31	1.55e-10	2	Dstn
5.73e-14	0.18	0.41	0.27	8.73e-10	2	Pfdn6
6.05e-14	0.18	0.68	0.55	9.21e-10	2	Pkm
7.35e-14	0.18	0.43	0.29	1.12e-09	2	Ewsr1
7.98e-14	0.18	0.44	0.3	1.22e-09	2	Psmc3
1.13e-13	0.18	0.37	0.24	1.73e-09	2	Hspa9
1.26e-13	0.18	0.42	0.28	1.92e-09	2	Mdh1
1.97e-13	0.18	0.98	0.92	3.01e-09	2	Hspa8
2.38e-13	0.18	0.4	0.27	3.63e-09	2	Mrpl54
6.53e-13	0.18	0.5	0.36	9.94e-09	2	Pdcd5
1.17e-12	0.18	0.45	0.32	1.79e-08	2	Cycs
1.32e-12	0.18	0.41	0.27	2.01e-08	2	Dnaja2
1.62e-12	0.18	0.86	0.77	2.46e-08	2	Gapdh
1.74e-12	0.18	0.37	0.25	2.65e-08	2	Khdrbs1
2.45e-12	0.18	0.44	0.31	3.73e-08	2	Zfp706
6.40e-12	0.18	0.55	0.41	9.75e-08	2	Prdx6
1.11e-11	0.18	0.53	0.4	1.70e-07	2	Minos1
1.16e-11	0.18	0.76	0.66	1.76e-07	2	Atp5h
5.40e-10	0.18	0.66	0.56	8.23e-06	2	Snrpg
5.88e-10	0.18	0.67	0.61	8.95e-06	2	Cox5a
8.08e-07	0.18	0.56	0.49	1.23e-02	2	Eif3a
7.27e-22	0.17	0.26	0.12	1.11e-17	2	Mcm2
1.46e-21	0.17	0.26	0.12	2.23e-17	2	Ckap5
2.32e-19	0.17	0.3	0.15	3.53e-15	2	Snrnp40
2.42e-18	0.17	0.28	0.14	3.69e-14	2	Dkc1
5.80e-18	0.17	0.32	0.17	8.84e-14	2	Fam136a
3.25e-17	0.17	0.3	0.16	4.95e-13	2	Parp1
5.24e-17	0.17	0.43	0.26	7.99e-13	2	Mbd3
2.63e-16	0.17	0.34	0.19	4.00e-12	2	Sae1
4.38e-16	0.17	0.41	0.26	6.68e-12	2	Eif3l
7.44e-16	0.17	0.4	0.24	1.13e-11	2	Lsm6
1.62e-15	0.17	0.35	0.21	2.47e-11	2	Dazap1
3.68e-15	0.17	0.26	0.14	5.60e-11	2	Erh
7.28e-15	0.17	0.37	0.23	1.11e-10	2	Nudt21
3.25e-14	0.17	0.38	0.24	4.95e-10	2	Atxn10
5.97e-14	0.17	0.35	0.22	9.09e-10	2	Ube2m
8.19e-14	0.17	0.3	0.17	1.25e-09	2	Paics
1.90e-13	0.17	0.45	0.3	2.89e-09	2	Nop56
2.60e-13	0.17	0.34	0.21	3.96e-09	2	Eif3b
3.16e-13	0.17	0.51	0.36	4.82e-09	2	Ndufs5
8.73e-13	0.17	0.39	0.26	1.33e-08	2	Bcas2
3.29e-12	0.17	0.5	0.36	5.01e-08	2	Sumo1
3.73e-12	0.17	0.43	0.3	5.68e-08	2	Thoc7
4.52e-12	0.17	0.52	0.38	6.89e-08	2	Ndufb8
4.97e-12	0.17	0.88	0.8	7.57e-08	2	Cox7c
1.58e-11	0.17	0.42	0.29	2.40e-07	2	Stub1
6.00e-11	0.17	0.45	0.32	9.13e-07	2	Ndufs6
2.56e-10	0.17	0.6	0.48	3.90e-06	2	Ldha
1.33e-09	0.17	0.36	0.25	2.03e-05	2	Hspa4
8.70e-09	0.17	0.35	0.24	1.33e-04	2	G3bp2
4.39e-08	0.17	0.46	0.36	6.70e-04	2	Pafah1b1
7.17e-08	0.17	0.38	0.28	1.09e-03	2	Ddx21
1.62e-22	0.16	0.29	0.13	2.46e-18	2	Ruvbl2
6.50e-20	0.16	0.3	0.14	9.90e-16	2	Pmm1
1.73e-18	0.16	0.29	0.15	2.63e-14	2	Rpf2
7.27e-18	0.16	0.34	0.19	1.11e-13	2	Hnrnph3
7.32e-18	0.16	0.3	0.15	1.11e-13	2	Sfxn1
1.18e-17	0.16	0.33	0.18	1.80e-13	2	Nudcd2
3.25e-17	0.16	0.3	0.16	4.95e-13	2	Acp1
6.48e-17	0.16	0.26	0.13	9.87e-13	2	Hirip3
1.41e-16	0.16	0.3	0.16	2.14e-12	2	Ddah2
2.02e-16	0.16	0.32	0.18	3.07e-12	2	Ilf2
2.78e-16	0.16	0.34	0.2	4.23e-12	2	Nol12
4.82e-16	0.16	0.3	0.16	7.34e-12	2	Actl6a
6.55e-16	0.16	0.25	0.13	9.97e-12	2	Ilf3
1.29e-15	0.16	0.34	0.2	1.97e-11	2	Lsm2
3.28e-15	0.16	0.36	0.21	4.99e-11	2	Exosc8
1.49e-14	0.16	0.37	0.23	2.27e-10	2	Cuedc2
1.54e-14	0.16	0.38	0.24	2.34e-10	2	Mrpl51
2.74e-14	0.16	0.36	0.22	4.18e-10	2	Polr2c
3.12e-14	0.16	0.42	0.28	4.75e-10	2	Tceal9
4.41e-14	0.16	0.44	0.29	6.72e-10	2	Rheb
3.40e-13	0.16	0.31	0.18	5.18e-09	2	Eif4e
4.32e-13	0.16	0.42	0.28	6.58e-09	2	Txnl4a
6.26e-13	0.16	0.38	0.24	9.53e-09	2	Srsf6
6.58e-13	0.16	0.31	0.18	1.00e-08	2	Naa10
7.69e-13	0.16	0.43	0.29	1.17e-08	2	Gtf2h5
9.29e-13	0.16	0.36	0.23	1.42e-08	2	Eif2s1
1.04e-12	0.16	0.36	0.23	1.58e-08	2	Sumo3
1.17e-12	0.16	0.45	0.31	1.78e-08	2	Mrpl20
1.23e-12	0.16	0.41	0.27	1.87e-08	2	Cetn3
1.42e-12	0.16	0.39	0.25	2.16e-08	2	Cfdp1
1.83e-12	0.16	0.44	0.3	2.78e-08	2	Dnajc8
1.88e-12	0.16	0.29	0.17	2.86e-08	2	Cdk2ap1
2.79e-12	0.16	0.46	0.32	4.24e-08	2	2410015M20Rik
6.30e-12	0.16	0.39	0.26	9.59e-08	2	Lsm3
3.28e-11	0.16	0.4	0.27	5.00e-07	2	Uqcrfs1
3.73e-11	0.16	0.42	0.3	5.68e-07	2	Psma5
6.70e-11	0.16	0.33	0.21	1.02e-06	2	Ywhag
1.38e-10	0.16	0.4	0.28	2.10e-06	2	Eif1ax
3.40e-10	0.16	0.35	0.23	5.18e-06	2	Tmpo
8.96e-09	0.16	0.64	0.56	1.37e-04	2	Atp5c1
2.12e-08	0.16	0.34	0.24	3.23e-04	2	Eif4g1
3.09e-08	0.16	0.44	0.33	4.70e-04	2	Ywhah
4.15e-08	0.16	0.6	0.54	6.33e-04	2	Atp5d
2.58e-24	0.15	0.25	0.1	3.93e-20	2	Rab3a
1.93e-22	0.15	0.28	0.13	2.94e-18	2	Thoc3
3.01e-19	0.15	0.28	0.13	4.59e-15	2	Snrpn
4.13e-18	0.15	0.26	0.12	6.29e-14	2	Kars
1.83e-16	0.15	0.3	0.16	2.79e-12	2	Pgp
2.76e-16	0.15	0.31	0.17	4.20e-12	2	Kdm1a
3.48e-16	0.15	0.28	0.14	5.30e-12	2	Gstm5
1.71e-15	0.15	0.25	0.13	2.60e-11	2	Tsen34
2.07e-15	0.15	0.3	0.16	3.16e-11	2	Dnajc9
2.03e-14	0.15	0.41	0.25	3.09e-10	2	Magoh
9.30e-14	0.15	0.3	0.17	1.42e-09	2	Pum1
1.31e-13	0.15	0.3	0.17	1.99e-09	2	Rars
2.63e-12	0.15	0.34	0.22	4.00e-08	2	Cirbp
1.06e-11	0.15	0.41	0.28	1.61e-07	2	Polr2j
1.38e-11	0.15	0.46	0.32	2.10e-07	2	Rnaseh2c
1.53e-11	0.15	0.33	0.21	2.33e-07	2	Prrc2a
1.71e-11	0.15	0.4	0.27	2.61e-07	2	Vdac3
2.03e-11	0.15	0.38	0.25	3.10e-07	2	Adh5
4.63e-11	0.15	0.71	0.61	7.05e-07	2	Prdx1
6.53e-11	0.15	0.38	0.26	9.95e-07	2	Psmd6
1.47e-10	0.15	0.33	0.22	2.23e-06	2	Psmd2
2.31e-10	0.15	0.93	0.83	3.51e-06	2	Eef1b2
5.88e-10	0.15	0.42	0.3	8.95e-06	2	Psma6
7.40e-10	0.15	0.44	0.33	1.13e-05	2	Hnrnpdl
9.31e-10	0.15	0.41	0.29	1.42e-05	2	Fubp1
2.20e-09	0.15	0.4	0.29	3.35e-05	2	Dnajb6
3.72e-09	0.15	0.51	0.41	5.67e-05	2	Ube2i
4.31e-09	0.15	0.32	0.21	6.57e-05	2	Zbtb20
5.16e-09	0.15	0.31	0.21	7.87e-05	2	Tardbp
1.51e-08	0.15	0.39	0.28	2.30e-04	2	H2afv
1.87e-08	0.15	0.32	0.22	2.85e-04	2	Ap2a2
1.17e-07	0.15	0.37	0.27	1.78e-03	2	Kif5b
2.05e-07	0.15	0.44	0.35	3.12e-03	2	St13
2.32e-07	0.15	0.64	0.57	3.53e-03	2	Cox7a2
0.00e+00	2.13	0.91	0.04	0.00e+00	3	Fcgr4
6.64e-265	1.91	0.99	0.27	1.01e-260	3	Fcer1g
7.87e-287	1.64	0.93	0.19	1.20e-282	3	Gngt2
1.09e-186	1.64	0.97	0.4	1.67e-182	3	Cst3
4.16e-260	1.47	0.92	0.22	6.33e-256	3	Pou2f2
0.00e+00	1.45	0.91	0.08	0.00e+00	3	Clec4a3
1.62e-129	1.45	1	0.88	2.47e-125	3	Tmsb4x
1.01e-288	1.43	0.92	0.16	1.53e-284	3	Ms4a6c
4.17e-257	1.43	0.93	0.2	6.35e-253	3	Lst1
0.00e+00	1.38	0.86	0.01	0.00e+00	3	Cd300e
2.78e-235	1.34	0.83	0.16	4.24e-231	3	Id2
1.17e-163	1.32	0.9	0.3	1.78e-159	3	Sat1
1.05e-159	1.32	0.9	0.35	1.60e-155	3	Gpx1
2.32e-129	1.31	1	0.9	3.54e-125	3	Ftl1
3.36e-157	1.3	0.95	0.38	5.13e-153	3	B2m
1.73e-241	1.26	0.81	0.15	2.64e-237	3	Itgal
4.57e-220	1.26	0.88	0.2	6.97e-216	3	Cybb
0.00e+00	1.22	0.87	0.07	0.00e+00	3	Clec4a1
3.16e-116	1.22	0.99	0.72	4.82e-112	3	Fth1
1.33e-205	1.2	0.9	0.24	2.03e-201	3	Fyb
6.08e-206	1.19	0.93	0.24	9.26e-202	3	Ctss
1.43e-303	1.12	0.82	0.11	2.17e-299	3	Csf1r
0.00e+00	1.11	0.71	0.03	0.00e+00	3	Ear2
0.00e+00	1.11	0.69	0.03	0.00e+00	3	Ace
8.63e-136	1.11	0.96	0.4	1.32e-131	3	H2-D1
1.49e-293	1.1	0.71	0.08	2.28e-289	3	Ap1s2
8.63e-233	1.1	0.83	0.17	1.31e-228	3	Itgb2
3.07e-158	1.08	0.88	0.32	4.67e-154	3	Ucp2
3.14e-173	1.07	0.91	0.31	4.79e-169	3	Cd47
0.00e+00	1.06	0.7	0.04	0.00e+00	3	Cd300ld
3.80e-81	1.06	0.58	0.19	5.78e-77	3	Hspa1b
1.89e-146	1.05	0.92	0.33	2.88e-142	3	Coro1a
2.12e-157	1.04	0.86	0.25	3.23e-153	3	Cebpb
4.06e-156	1.04	0.92	0.31	6.18e-152	3	Ptprc
1.09e-153	1.04	0.93	0.32	1.65e-149	3	Cyba
2.94e-153	1.04	0.91	0.33	4.49e-149	3	Ctsb
8.16e-152	1.04	0.87	0.28	1.24e-147	3	Lyz2
2.08e-129	1.04	0.95	0.48	3.17e-125	3	Itm2b
2.21e-168	1.03	0.98	0.28	3.37e-164	3	Tyrobp
6.57e-168	1.03	0.95	0.31	1.00e-163	3	Laptm5
1.42e-166	1.03	0.88	0.29	2.16e-162	3	Rap1b
9.63e-155	1.01	0.87	0.3	1.47e-150	3	Msn
1.74e-158	1	0.92	0.34	2.65e-154	3	Iqgap1
0.00e+00	0.98	0.72	0.03	0.00e+00	3	Treml4
9.83e-184	0.98	0.87	0.23	1.50e-179	3	Lyn
1.75e-88	0.98	0.58	0.17	2.67e-84	3	Hspa1a
6.20e-198	0.97	0.84	0.21	9.44e-194	3	Flna
5.27e-197	0.97	0.75	0.14	8.03e-193	3	Nr4a1
8.07e-111	0.97	0.97	0.81	1.23e-106	3	Calm1
0.00e+00	0.96	0.8	0.08	0.00e+00	3	Hck
2.00e-306	0.96	0.85	0.11	3.05e-302	3	Cd300c2
0.00e+00	0.95	0.71	0.06	0.00e+00	3	Stap1
1.73e-169	0.94	0.76	0.17	2.63e-165	3	Pla2g7
0.00e+00	0.93	0.68	0.06	0.00e+00	3	Bcl2a1b
0.00e+00	0.93	0.67	0.05	0.00e+00	3	Pecam1
4.07e-160	0.93	0.88	0.26	6.21e-156	3	Lcp1
1.89e-155	0.93	0.74	0.19	2.88e-151	3	Itga4
0.00e+00	0.92	0.73	0.05	0.00e+00	3	Cx3cr1
5.53e-267	0.92	0.72	0.09	8.42e-263	3	Smpdl3a
1.27e-104	0.92	0.59	0.16	1.94e-100	3	Zfp36l1
1.26e-235	0.91	0.72	0.1	1.92e-231	3	Acp5
3.11e-167	0.91	0.68	0.13	4.74e-163	3	Cd9
3.77e-145	0.91	0.91	0.31	5.74e-141	3	Ifitm2
0.00e+00	0.9	0.77	0.06	0.00e+00	3	Grk3
2.75e-290	0.9	0.68	0.07	4.19e-286	3	Ms4a6d
3.49e-189	0.9	0.87	0.21	5.31e-185	3	Spi1
1.03e-138	0.9	0.75	0.21	1.57e-134	3	Adgre5
4.00e-250	0.89	0.61	0.06	6.09e-246	3	Pglyrp1
3.33e-228	0.89	0.49	0.04	5.07e-224	3	Hes1
1.22e-140	0.89	0.82	0.26	1.86e-136	3	Zeb2
1.40e-134	0.89	0.9	0.33	2.13e-130	3	Ly6e
1.10e-128	0.89	0.94	0.46	1.68e-124	3	Arpc2
3.49e-124	0.89	0.92	0.31	5.32e-120	3	Cd52
0.00e+00	0.88	0.62	0.05	0.00e+00	3	Spn
6.19e-232	0.88	0.62	0.08	9.43e-228	3	Fam46a
5.64e-142	0.88	0.94	0.34	8.59e-138	3	Arpc1b
2.81e-101	0.88	0.95	0.56	4.28e-97	3	Pfn1
1.04e-239	0.87	0.77	0.12	1.58e-235	3	Nadk
3.05e-155	0.87	0.84	0.23	4.64e-151	3	Ifitm3
8.74e-140	0.87	0.82	0.27	1.33e-135	3	Atp1a1
2.02e-94	0.87	0.73	0.3	3.08e-90	3	Lmo4
6.09e-76	0.87	0.98	0.84	9.27e-72	3	Malat1
1.50e-274	0.86	0.67	0.07	2.29e-270	3	Dusp16
0.00e+00	0.85	0.69	0.04	0.00e+00	3	Adgre4
2.97e-164	0.85	0.88	0.27	4.53e-160	3	Tln1
1.43e-157	0.85	0.85	0.24	2.18e-153	3	Gm2a
2.28e-89	0.85	1	0.94	3.47e-85	3	Actb
0.00e+00	0.84	0.69	0.05	0.00e+00	3	Myo1g
0.00e+00	0.84	0.65	0.03	0.00e+00	3	Bcl2a1a
6.16e-85	0.84	0.91	0.62	9.38e-81	3	Txn1
0.00e+00	0.83	0.61	0.04	0.00e+00	3	Bcl2a1d
7.45e-256	0.83	0.78	0.11	1.14e-251	3	Efhd2
0.00e+00	0.82	0.6	0.02	0.00e+00	3	Eno3
4.75e-187	0.82	0.71	0.14	7.24e-183	3	Filip1l
9.32e-137	0.82	0.79	0.23	1.42e-132	3	Cytip
2.71e-281	0.81	0.64	0.06	4.13e-277	3	Stk10
2.10e-164	0.8	0.82	0.21	3.20e-160	3	Ptpn6
1.78e-136	0.8	0.9	0.34	2.71e-132	3	Lamp1
2.89e-117	0.8	0.68	0.18	4.41e-113	3	Plek
3.75e-168	0.79	0.71	0.14	5.71e-164	3	Rgs2
4.10e-102	0.79	0.9	0.47	6.25e-98	3	Rhoa
7.17e-133	0.78	0.79	0.22	1.09e-128	3	Msrb1
8.95e-87	0.77	0.9	0.41	1.36e-82	3	Btg1
0.00e+00	0.76	0.56	0.03	0.00e+00	3	Hfe
2.28e-281	0.76	0.78	0.09	3.47e-277	3	Pld4
9.05e-267	0.76	0.78	0.1	1.38e-262	3	Fgr
1.98e-207	0.76	0.57	0.07	3.01e-203	3	Klf4
1.92e-160	0.76	0.8	0.18	2.93e-156	3	Mpeg1
5.02e-137	0.76	0.71	0.18	7.64e-133	3	Samsn1
1.42e-274	0.75	0.69	0.08	2.17e-270	3	Tnfrsf1b
3.24e-123	0.75	0.86	0.34	4.94e-119	3	Myl12b
2.49e-136	0.74	0.77	0.21	3.79e-132	3	Ncf4
1.67e-112	0.74	0.56	0.12	2.54e-108	3	Polr2l
3.98e-187	0.73	0.51	0.06	6.07e-183	3	Fabp4
1.75e-123	0.73	0.74	0.21	2.67e-119	3	Ifngr1
1.49e-204	0.72	0.69	0.11	2.27e-200	3	Prkcd
4.78e-156	0.72	0.75	0.18	7.29e-152	3	Vamp8
8.59e-108	0.72	0.91	0.38	1.31e-103	3	Psap
2.57e-249	0.71	0.6	0.06	3.91e-245	3	Tgm2
1.63e-237	0.71	0.77	0.11	2.48e-233	3	Cd300a
9.01e-224	0.71	0.67	0.09	1.37e-219	3	Lrp1
3.50e-189	0.71	0.73	0.13	5.34e-185	3	Cd68
3.31e-145	0.71	0.73	0.17	5.05e-141	3	Plin2
1.23e-115	0.71	0.72	0.21	1.88e-111	3	Plac8
8.06e-111	0.71	0.89	0.34	1.23e-106	3	Gnai2
4.13e-201	0.7	0.65	0.1	6.29e-197	3	Cyth3
6.22e-159	0.7	0.68	0.14	9.48e-155	3	Stk38
5.48e-143	0.7	0.72	0.17	8.35e-139	3	Limd2
1.92e-134	0.7	0.67	0.16	2.93e-130	3	Man2b1
3.87e-111	0.7	0.84	0.34	5.90e-107	3	Capzb
4.38e-104	0.7	0.8	0.31	6.67e-100	3	Ptpn1
5.28e-304	0.69	0.59	0.04	8.05e-300	3	Adgre1
1.45e-289	0.69	0.66	0.06	2.20e-285	3	Abi3
1.48e-223	0.69	0.77	0.12	2.25e-219	3	Sirpa
4.36e-161	0.69	0.71	0.15	6.64e-157	3	Apbb1ip
8.48e-133	0.69	0.81	0.22	1.29e-128	3	Lgals3
3.13e-126	0.69	0.49	0.08	4.77e-122	3	Rgs1
8.43e-183	0.68	0.61	0.09	1.28e-178	3	Slc15a3
0.00e+00	0.67	0.62	0.05	0.00e+00	3	Tcf7l2
9.80e-237	0.67	0.6	0.06	1.49e-232	3	Metrnl
2.23e-132	0.67	0.85	0.26	3.39e-128	3	Gmfg
3.38e-127	0.67	0.64	0.15	5.15e-123	3	Arhgef1
9.90e-111	0.67	0.86	0.32	1.51e-106	3	Srgn
4.17e-288	0.66	0.63	0.06	6.35e-284	3	Ptprj
3.49e-247	0.66	0.6	0.06	5.32e-243	3	Slc11a1
2.78e-181	0.66	0.55	0.08	4.23e-177	3	Pag1
4.80e-160	0.66	0.73	0.16	7.31e-156	3	Hcls1
1.09e-149	0.66	0.69	0.15	1.67e-145	3	Ctsa
3.29e-120	0.66	0.82	0.26	5.01e-116	3	Rac2
2.37e-108	0.66	0.7	0.2	3.62e-104	3	Cd44
2.15e-40	0.66	1	1	3.28e-36	3	Gm42418
1.67e-193	0.65	0.66	0.1	2.55e-189	3	Ptpre
2.93e-104	0.65	0.78	0.27	4.46e-100	3	Nfkbia
0.00e+00	0.64	0.53	0.01	0.00e+00	3	Lilra5
9.55e-181	0.64	0.71	0.13	1.45e-176	3	Syk
5.63e-119	0.64	0.86	0.27	8.58e-115	3	Fxyd5
4.08e-96	0.64	0.74	0.25	6.22e-92	3	Lsp1
3.94e-160	0.63	0.42	0.05	6.00e-156	3	Cd72
5.42e-125	0.63	0.62	0.14	8.25e-121	3	Ezr
3.68e-109	0.63	0.81	0.26	5.61e-105	3	Arhgdib
8.61e-104	0.63	0.74	0.25	1.31e-99	3	Atp2b1
4.63e-174	0.62	0.63	0.1	7.05e-170	3	Fmnl1
9.16e-162	0.62	0.63	0.12	1.40e-157	3	Stk24
6.34e-109	0.62	0.81	0.27	9.66e-105	3	Cd53
1.26e-80	0.62	0.7	0.29	1.91e-76	3	Klf13
2.76e-79	0.62	0.9	0.54	4.20e-75	3	Cdc42
3.33e-59	0.62	0.66	0.27	5.07e-55	3	Klf2
1.36e-40	0.62	0.73	0.46	2.07e-36	3	Jun
0.00e+00	0.61	0.51	0.01	0.00e+00	3	Pparg
1.40e-113	0.61	0.74	0.23	2.14e-109	3	Laptm4a
6.57e-98	0.61	0.82	0.33	1.00e-93	3	Ptp4a2
1.16e-82	0.61	0.83	0.38	1.77e-78	3	Atox1
7.39e-257	0.6	0.53	0.04	1.13e-252	3	Siglece
9.48e-162	0.6	0.58	0.1	1.44e-157	3	Cyfip2
4.47e-149	0.6	0.66	0.13	6.82e-145	3	Prr13
7.59e-144	0.6	0.55	0.1	1.16e-139	3	B4galnt1
6.73e-134	0.6	0.53	0.09	1.02e-129	3	Nfe2l2
9.31e-99	0.6	0.57	0.14	1.42e-94	3	S100a4
8.83e-89	0.6	0.69	0.25	1.34e-84	3	Zfand5
5.71e-252	0.59	0.61	0.06	8.70e-248	3	Fam49a
2.65e-240	0.59	0.6	0.06	4.03e-236	3	Pilra
4.51e-165	0.59	0.57	0.09	6.87e-161	3	Pbxip1
2.05e-155	0.59	0.55	0.08	3.13e-151	3	Ccl6
8.55e-129	0.59	0.72	0.18	1.30e-124	3	Napsa
4.09e-91	0.59	0.87	0.4	6.23e-87	3	Taldo1
5.04e-85	0.59	0.88	0.35	7.68e-81	3	H2-K1
0.00e+00	0.58	0.49	0.02	0.00e+00	3	Smpdl3b
8.00e-278	0.58	0.54	0.04	1.22e-273	3	Rbpms
6.33e-193	0.58	0.58	0.08	9.64e-189	3	Apobec1
8.77e-168	0.58	0.64	0.11	1.34e-163	3	Bin2
1.15e-167	0.58	0.65	0.11	1.75e-163	3	Csf2ra
8.68e-162	0.58	0.65	0.12	1.32e-157	3	Sh3bgrl
1.11e-138	0.58	0.57	0.11	1.69e-134	3	Ankrd44
9.83e-78	0.58	0.91	0.54	1.50e-73	3	Gng5
8.99e-216	0.57	0.6	0.07	1.37e-211	3	Cd48
7.82e-170	0.57	0.42	0.04	1.19e-165	3	Cd83
1.97e-154	0.57	0.58	0.1	3.00e-150	3	Tgfbr1
7.69e-119	0.57	0.53	0.1	1.17e-114	3	Nfkbiz
4.69e-93	0.57	0.74	0.27	7.15e-89	3	Itgb1
5.03e-93	0.57	0.71	0.23	7.66e-89	3	Samhd1
5.15e-84	0.57	0.58	0.18	7.85e-80	3	Ptp4a1
1.28e-81	0.57	0.79	0.35	1.95e-77	3	Sh3glb1
1.45e-259	0.56	0.58	0.05	2.22e-255	3	Cd244
1.37e-241	0.56	0.55	0.05	2.09e-237	3	Lair1
1.99e-228	0.56	0.6	0.06	3.03e-224	3	Rassf4
1.02e-198	0.56	0.62	0.08	1.55e-194	3	Lcp2
1.27e-188	0.56	0.57	0.08	1.94e-184	3	Myo1f
3.72e-161	0.56	0.6	0.1	5.67e-157	3	Il17ra
1.97e-152	0.56	0.4	0.04	2.99e-148	3	F10
7.73e-150	0.56	0.62	0.12	1.18e-145	3	Mef2a
2.13e-141	0.56	0.54	0.09	3.24e-137	3	Rel
3.75e-96	0.56	0.77	0.26	5.71e-92	3	Neat1
4.54e-95	0.56	0.75	0.27	6.91e-91	3	Cap1
9.62e-92	0.56	0.71	0.24	1.47e-87	3	Akap13
2.97e-90	0.56	0.84	0.34	4.53e-86	3	Ctsz
7.27e-78	0.56	0.68	0.24	1.11e-73	3	Zfp36
1.32e-59	0.56	0.7	0.31	2.02e-55	3	Fos
1.85e-59	0.56	0.97	0.9	2.82e-55	3	H3f3a
2.17e-189	0.55	0.57	0.07	3.31e-185	3	Rassf5
1.64e-178	0.55	0.54	0.07	2.50e-174	3	Abcg1
2.71e-158	0.55	0.6	0.1	4.12e-154	3	Pip4k2a
4.98e-158	0.55	0.56	0.09	7.58e-154	3	Mbp
3.46e-79	0.55	0.7	0.27	5.27e-75	3	Rap1a
1.65e-125	0.54	0.66	0.16	2.51e-121	3	Arhgap30
7.31e-124	0.54	0.5	0.08	1.11e-119	3	Clec4e
1.67e-106	0.54	0.67	0.19	2.55e-102	3	Dazap2
1.14e-80	0.54	0.71	0.28	1.74e-76	3	Actr2
1.34e-77	0.54	0.59	0.19	2.04e-73	3	Cdkn1b
1.28e-217	0.53	0.47	0.04	1.95e-213	3	Klra2
1.30e-162	0.53	0.49	0.06	1.97e-158	3	Cd82
8.55e-158	0.53	0.49	0.06	1.30e-153	3	Nabp1
2.22e-127	0.53	0.58	0.12	3.39e-123	3	Lrrfip1
3.67e-113	0.53	0.53	0.1	5.58e-109	3	Socs3
7.02e-52	0.53	0.93	0.67	1.07e-47	3	Cfl1
4.00e-226	0.52	0.51	0.04	6.10e-222	3	Nupr1
1.35e-215	0.52	0.49	0.04	2.06e-211	3	Fpr2
3.98e-212	0.52	0.49	0.04	6.06e-208	3	Rras
1.27e-188	0.52	0.4	0.03	1.93e-184	3	Gstm1
4.29e-181	0.52	0.5	0.06	6.54e-177	3	Cblb
3.53e-171	0.52	0.55	0.08	5.38e-167	3	Il6ra
4.19e-160	0.52	0.53	0.08	6.38e-156	3	Plekho2
1.49e-116	0.52	0.58	0.13	2.26e-112	3	Tmed5
2.31e-97	0.52	0.68	0.19	3.52e-93	3	Slfn2
2.68e-97	0.52	0.66	0.19	4.08e-93	3	Celf2
2.48e-91	0.52	0.75	0.26	3.78e-87	3	Ostf1
1.80e-79	0.52	0.72	0.28	2.74e-75	3	Fam49b
6.18e-75	0.52	0.6	0.19	9.42e-71	3	Gdpd3
5.46e-236	0.51	0.45	0.03	8.32e-232	3	Ceacam1
1.43e-213	0.51	0.48	0.04	2.18e-209	3	Gm21188
6.11e-208	0.51	0.48	0.04	9.31e-204	3	Map3k8
1.34e-195	0.51	0.51	0.06	2.05e-191	3	Fcgrt
3.15e-127	0.51	0.56	0.11	4.79e-123	3	Nfkb1
5.00e-106	0.51	0.52	0.1	7.62e-102	3	Ms4a6b
4.65e-90	0.51	0.55	0.13	7.08e-86	3	Tgfbi
1.27e-149	0.5	0.61	0.11	1.94e-145	3	Rnf130
6.70e-148	0.5	0.52	0.08	1.02e-143	3	Nrip1
3.54e-146	0.5	0.56	0.09	5.40e-142	3	Igsf6
7.10e-122	0.5	0.38	0.05	1.08e-117	3	Tppp3
2.42e-113	0.5	0.49	0.1	3.68e-109	3	Tmcc1
3.40e-88	0.5	0.46	0.11	5.18e-84	3	Emc2
1.47e-73	0.5	0.5	0.13	2.24e-69	3	Lgmn
1.17e-66	0.5	0.79	0.37	1.78e-62	3	Clic1
1.14e-65	0.5	0.72	0.31	1.74e-61	3	Arpc5
1.13e-59	0.5	0.76	0.36	1.72e-55	3	Rsrp1
2.49e-227	0.49	0.44	0.03	3.79e-223	3	Gm15987
2.08e-175	0.49	0.53	0.07	3.17e-171	3	Abhd12
2.41e-153	0.49	0.46	0.06	3.67e-149	3	Ccl9
1.14e-149	0.49	0.62	0.11	1.73e-145	3	Emilin2
3.83e-114	0.49	0.47	0.08	5.84e-110	3	Id3
3.28e-104	0.49	0.54	0.12	4.99e-100	3	Gpcpd1
6.29e-80	0.49	0.73	0.26	9.58e-76	3	Myh9
1.30e-68	0.49	0.7	0.29	1.98e-64	3	Tmed10
4.15e-56	0.49	0.88	0.57	6.32e-52	3	Myl6
4.23e-164	0.48	0.47	0.06	6.45e-160	3	Arl5c
1.66e-153	0.48	0.52	0.08	2.53e-149	3	Sema4d
5.79e-137	0.48	0.58	0.11	8.82e-133	3	Cyth4
3.07e-124	0.48	0.55	0.11	4.68e-120	3	Dock2
5.62e-117	0.48	0.61	0.13	8.56e-113	3	Grn
7.88e-95	0.48	0.56	0.14	1.20e-90	3	Vasp
6.76e-92	0.48	0.59	0.16	1.03e-87	3	Glud1
1.68e-80	0.48	0.64	0.22	2.56e-76	3	Ptbp3
5.57e-72	0.48	0.75	0.31	8.48e-68	3	Tmbim6
5.25e-58	0.48	0.74	0.32	7.99e-54	3	Xist
1.62e-56	0.48	0.99	0.86	2.47e-52	3	Actg1
4.30e-45	0.48	0.94	0.74	6.54e-41	3	Ddx5
3.27e-169	0.47	0.44	0.05	4.98e-165	3	Adrb2
2.44e-155	0.47	0.43	0.05	3.72e-151	3	Traf1
3.24e-98	0.47	0.56	0.14	4.93e-94	3	Zmiz1
1.44e-84	0.47	0.59	0.18	2.19e-80	3	Evl
2.81e-78	0.47	0.64	0.2	4.28e-74	3	Tgfb1
1.29e-75	0.47	0.74	0.28	1.96e-71	3	Rrbp1
6.63e-69	0.47	0.84	0.4	1.01e-64	3	Actr3
1.91e-63	0.47	0.85	0.43	2.91e-59	3	Gabarap
2.15e-62	0.47	0.76	0.36	3.27e-58	3	Capza2
3.44e-51	0.47	0.61	0.26	5.24e-47	3	Klf6
9.88e-181	0.46	0.43	0.04	1.51e-176	3	Fgd4
5.75e-163	0.46	0.52	0.07	8.76e-159	3	Ptk2b
1.40e-145	0.46	0.42	0.05	2.14e-141	3	Dusp5
9.14e-143	0.46	0.44	0.06	1.39e-138	3	Sgms1
5.79e-124	0.46	0.49	0.08	8.82e-120	3	Clip1
1.57e-112	0.46	0.55	0.11	2.39e-108	3	Anxa5
5.79e-96	0.46	0.57	0.14	8.82e-92	3	Vmp1
5.73e-89	0.46	0.26	0.03	8.73e-85	3	Ccl3
3.40e-83	0.46	0.83	0.35	5.17e-79	3	Mcl1
7.67e-78	0.46	0.52	0.14	1.17e-73	3	Ccdc88a
3.03e-67	0.46	0.56	0.18	4.62e-63	3	Ssh2
2.16e-57	0.46	0.65	0.29	3.29e-53	3	Nmt1
4.04e-54	0.46	0.61	0.25	6.16e-50	3	Ier2
6.28e-46	0.46	0.58	0.26	9.57e-42	3	Tsc22d3
2.98e-164	0.45	0.51	0.07	4.54e-160	3	Themis2
6.25e-139	0.45	0.45	0.06	9.52e-135	3	Man2a1
2.59e-121	0.45	0.48	0.08	3.94e-117	3	Trps1
2.62e-120	0.45	0.55	0.11	3.98e-116	3	Coro1b
9.10e-107	0.45	0.52	0.11	1.39e-102	3	Ikzf1
2.11e-105	0.45	0.43	0.07	3.21e-101	3	Ms4a4c
8.43e-104	0.45	0.5	0.1	1.28e-99	3	Clec2d
5.78e-103	0.45	0.54	0.12	8.80e-99	3	Mapkapk2
5.67e-96	0.45	0.57	0.15	8.63e-92	3	Rab10
1.97e-63	0.45	0.68	0.28	3.01e-59	3	Dusp1
2.71e-58	0.45	0.54	0.18	4.13e-54	3	Ahnak
1.36e-56	0.45	0.88	0.53	2.07e-52	3	Arpc3
4.87e-52	0.45	0.55	0.21	7.42e-48	3	Cxcr4
4.45e-48	0.45	0.38	0.11	6.77e-44	3	Wfdc17
8.44e-46	0.45	0.87	0.59	1.29e-41	3	Serf2
1.42e-39	0.45	0.64	0.34	2.16e-35	3	Ubc
1.27e-156	0.44	0.47	0.06	1.94e-152	3	Rb1
5.75e-148	0.44	0.52	0.08	8.76e-144	3	Nfam1
2.91e-142	0.44	0.45	0.06	4.43e-138	3	Rin3
1.89e-113	0.44	0.54	0.11	2.87e-109	3	Ppt1
2.91e-107	0.44	0.55	0.12	4.43e-103	3	Creg1
2.02e-85	0.44	0.77	0.28	3.08e-81	3	Tpd52
9.27e-76	0.44	0.61	0.2	1.41e-71	3	Abracl
8.05e-53	0.44	0.99	0.93	1.23e-48	3	Fau
4.54e-48	0.44	0.68	0.31	6.92e-44	3	Zfp36l2
3.56e-34	0.44	0.6	0.31	5.42e-30	3	Prdx5
3.67e-239	0.43	0.4	0.02	5.59e-235	3	Gk
4.09e-133	0.43	0.48	0.08	6.23e-129	3	Rasa3
5.73e-105	0.43	0.52	0.11	8.74e-101	3	Mob1a
1.83e-97	0.43	0.5	0.11	2.79e-93	3	Ikbkb
3.51e-93	0.43	0.56	0.14	5.35e-89	3	Csk
3.62e-90	0.43	0.68	0.2	5.52e-86	3	Ctsh
1.09e-76	0.43	0.62	0.2	1.65e-72	3	Cdk2ap2
4.32e-43	0.43	0.72	0.4	6.58e-39	3	Ywhaz
1.88e-37	0.43	0.47	0.19	2.86e-33	3	Rexo2
4.10e-190	0.42	0.46	0.04	6.24e-186	3	Tnip1
2.45e-176	0.42	0.44	0.04	3.73e-172	3	Acp2
5.87e-156	0.42	0.48	0.06	8.94e-152	3	Ifitm6
2.21e-152	0.42	0.43	0.05	3.37e-148	3	Camkk2
1.03e-144	0.42	0.49	0.07	1.57e-140	3	Mpp1
6.63e-139	0.42	0.46	0.06	1.01e-134	3	Slc43a2
3.98e-127	0.42	0.52	0.09	6.07e-123	3	Pirb
2.18e-116	0.42	0.56	0.11	3.32e-112	3	Skap2
1.11e-108	0.42	0.37	0.05	1.70e-104	3	Sgk1
6.00e-95	0.42	0.55	0.13	9.14e-91	3	Ppp2r5a
1.40e-85	0.42	0.55	0.14	2.13e-81	3	Grk2
2.97e-85	0.42	0.35	0.06	4.52e-81	3	Ccnd2
7.23e-80	0.42	0.42	0.09	1.10e-75	3	Cyp4f18
2.20e-69	0.42	0.62	0.22	3.34e-65	3	Tmem50a
7.90e-69	0.42	0.51	0.16	1.20e-64	3	Bnip3l
5.73e-44	0.42	0.73	0.41	8.73e-40	3	Tkt
2.30e-164	0.41	0.4	0.04	3.50e-160	3	Spata13
8.41e-149	0.41	0.34	0.03	1.28e-144	3	Nr1h3
7.48e-125	0.41	0.46	0.07	1.14e-120	3	Runx1
1.46e-120	0.41	0.46	0.07	2.22e-116	3	Itgam
4.72e-120	0.41	0.47	0.08	7.19e-116	3	Adam17
3.57e-116	0.41	0.49	0.09	5.43e-112	3	Zbtb7a
3.84e-110	0.41	0.46	0.08	5.84e-106	3	Tet2
1.38e-106	0.41	0.39	0.06	2.10e-102	3	Agpat4
9.93e-98	0.41	0.52	0.12	1.51e-93	3	Cnn2
1.56e-71	0.41	0.36	0.07	2.38e-67	3	Hmox1
1.16e-67	0.41	0.45	0.12	1.77e-63	3	Ehd1
2.67e-226	0.4	0.44	0.03	4.07e-222	3	Tmem51
9.19e-198	0.4	0.42	0.03	1.40e-193	3	Pilrb2
1.42e-151	0.4	0.43	0.05	2.17e-147	3	Hip1
1.51e-150	0.4	0.43	0.05	2.30e-146	3	Sipa1l1
4.83e-145	0.4	0.45	0.06	7.36e-141	3	Clec12a
1.23e-134	0.4	0.5	0.08	1.88e-130	3	Fermt3
5.28e-131	0.4	0.43	0.06	8.05e-127	3	Lipa
1.71e-87	0.4	0.45	0.1	2.61e-83	3	Sqstm1
1.02e-86	0.4	0.54	0.14	1.55e-82	3	Ubl3
2.37e-78	0.4	0.56	0.16	3.61e-74	3	Lamp2
6.63e-75	0.4	0.47	0.12	1.01e-70	3	Stat3
2.31e-74	0.4	0.59	0.19	3.52e-70	3	Capns1
7.70e-74	0.4	0.38	0.08	1.17e-69	3	Hebp1
1.60e-68	0.4	0.6	0.21	2.43e-64	3	Scp2
2.67e-61	0.4	0.69	0.27	4.07e-57	3	Vim
2.36e-60	0.4	0.64	0.25	3.60e-56	3	Tmem14c
4.66e-60	0.4	0.72	0.32	7.10e-56	3	Rac1
7.92e-51	0.4	0.6	0.25	1.21e-46	3	Macf1
1.82e-50	0.4	0.62	0.26	2.77e-46	3	Arpc4
1.18e-48	0.4	0.47	0.17	1.80e-44	3	Ppp1cb
1.30e-190	0.39	0.4	0.03	1.98e-186	3	Havcr2
5.29e-165	0.39	0.41	0.04	8.07e-161	3	Heg1
8.16e-134	0.39	0.37	0.04	1.24e-129	3	Arhgef3
1.33e-133	0.39	0.48	0.07	2.03e-129	3	Ccrl2
2.66e-133	0.39	0.47	0.07	4.05e-129	3	Bcl2
1.18e-132	0.39	0.41	0.05	1.79e-128	3	Gpr141
8.67e-125	0.39	0.42	0.06	1.32e-120	3	Adcy7
1.29e-123	0.39	0.46	0.07	1.97e-119	3	Rab8b
2.33e-117	0.39	0.4	0.06	3.54e-113	3	Tlr2
8.31e-106	0.39	0.4	0.06	1.27e-101	3	Svil
4.79e-99	0.39	0.48	0.1	7.30e-95	3	Klf3
1.04e-98	0.39	0.53	0.12	1.59e-94	3	Gpsm3
7.36e-93	0.39	0.58	0.14	1.12e-88	3	Unc93b1
4.13e-77	0.39	0.44	0.09	6.29e-73	3	Hp
8.39e-68	0.39	0.65	0.22	1.28e-63	3	Anxa2
4.65e-59	0.39	0.64	0.25	7.09e-55	3	Pitpna
1.24e-58	0.39	0.6	0.23	1.90e-54	3	Grb2
9.86e-48	0.39	0.73	0.39	1.50e-43	3	Tpm3
3.99e-32	0.39	0.83	0.6	6.08e-28	3	Prdx1
3.69e-192	0.38	0.38	0.03	5.62e-188	3	Irak3
2.22e-175	0.38	0.36	0.03	3.38e-171	3	Susd3
9.44e-150	0.38	0.44	0.05	1.44e-145	3	Pid1
3.22e-145	0.38	0.39	0.04	4.90e-141	3	Itgax
1.49e-139	0.38	0.42	0.05	2.27e-135	3	Rhoq
4.85e-122	0.38	0.36	0.04	7.38e-118	3	Klf10
1.31e-116	0.38	0.41	0.06	1.99e-112	3	Blvrb
1.85e-108	0.38	0.41	0.07	2.82e-104	3	Il10ra
1.35e-94	0.38	0.33	0.05	2.05e-90	3	Arrdc3
1.40e-88	0.38	0.37	0.06	2.13e-84	3	Clec4a2
1.28e-84	0.38	0.5	0.12	1.95e-80	3	Wasf2
5.07e-77	0.38	0.52	0.14	7.72e-73	3	Atp1b3
6.85e-75	0.38	0.41	0.09	1.04e-70	3	Dusp2
2.11e-70	0.38	0.49	0.14	3.22e-66	3	Atp6v1b2
1.35e-57	0.38	0.5	0.16	2.06e-53	3	Kpna4
8.90e-53	0.38	0.67	0.3	1.36e-48	3	Brk1
3.88e-51	0.38	0.7	0.32	5.92e-47	3	Cotl1
2.11e-144	0.37	0.35	0.03	3.21e-140	3	Rcan1
1.82e-129	0.37	0.43	0.06	2.77e-125	3	Lrrc25
4.41e-127	0.37	0.42	0.06	6.71e-123	3	Dok3
2.84e-92	0.37	0.47	0.1	4.32e-88	3	Arhgap17
9.33e-91	0.37	0.4	0.08	1.42e-86	3	Fcho2
4.23e-83	0.37	0.41	0.09	6.45e-79	3	Tmem131
1.71e-79	0.37	0.44	0.1	2.60e-75	3	Prkcb
2.23e-77	0.37	0.51	0.13	3.40e-73	3	Diaph1
1.53e-70	0.37	0.49	0.13	2.33e-66	3	Crlf3
8.29e-70	0.37	0.47	0.12	1.26e-65	3	Fuca1
5.90e-61	0.37	0.56	0.19	8.99e-57	3	Tpm4
5.96e-48	0.37	0.7	0.33	9.09e-44	3	Sh3bgrl3
7.65e-46	0.37	0.73	0.37	1.16e-41	3	Atp6v0b
1.93e-34	0.37	0.74	0.46	2.94e-30	3	Marcks
3.00e-34	0.37	0.77	0.49	4.57e-30	3	Aldoa
2.65e-154	0.36	0.36	0.03	4.04e-150	3	Bcl6
2.48e-135	0.36	0.39	0.05	3.78e-131	3	Acer3
1.04e-132	0.36	0.38	0.04	1.58e-128	3	Ifi207
1.15e-130	0.36	0.32	0.03	1.76e-126	3	Slc12a2
4.01e-126	0.36	0.38	0.05	6.11e-122	3	Adssl1
3.12e-113	0.36	0.43	0.07	4.75e-109	3	Nckap1l
9.36e-108	0.36	0.38	0.06	1.43e-103	3	Sh3bp5
9.51e-95	0.36	0.43	0.08	1.45e-90	3	Nrros
3.41e-86	0.36	0.49	0.11	5.19e-82	3	N4bp1
2.03e-85	0.36	0.42	0.09	3.10e-81	3	Sppl2a
2.70e-85	0.36	0.35	0.06	4.11e-81	3	Ddit4
5.28e-84	0.36	0.47	0.11	8.05e-80	3	Mier1
5.99e-78	0.36	0.49	0.13	9.13e-74	3	Irf2
2.00e-69	0.36	0.47	0.13	3.05e-65	3	Raf1
1.45e-45	0.36	0.36	0.11	2.21e-41	3	Atf3
4.96e-44	0.36	0.73	0.38	7.55e-40	3	Arhgdia
2.08e-43	0.36	0.96	0.58	3.18e-39	3	mt-Co1
1.16e-26	0.36	0.7	0.43	1.76e-22	3	Hspa5
1.15e-21	0.36	0.5	0.28	1.75e-17	3	Sod2
2.29e-21	0.36	0.38	0.18	3.48e-17	3	Gm26825
1.14e-11	0.36	0.68	0.57	1.74e-07	3	AC160336.1
1.98e-213	0.35	0.35	0.02	3.02e-209	3	Krt80
2.17e-188	0.35	0.29	0.01	3.31e-184	3	Tnip3
5.81e-144	0.35	0.37	0.04	8.85e-140	3	Lrrc8d
5.00e-130	0.35	0.4	0.05	7.62e-126	3	Arap1
4.83e-118	0.35	0.5	0.09	7.35e-114	3	Gcnt2
3.02e-113	0.35	0.32	0.04	4.60e-109	3	Lifr
3.95e-113	0.35	0.39	0.06	6.02e-109	3	Rftn1
1.08e-101	0.35	0.4	0.07	1.64e-97	3	March1
7.98e-100	0.35	0.37	0.06	1.22e-95	3	Clec4n
2.72e-97	0.35	0.49	0.1	4.14e-93	3	Snx20
5.00e-96	0.35	0.54	0.12	7.62e-92	3	Rhog
2.49e-92	0.35	0.45	0.09	3.79e-88	3	AB124611
3.31e-87	0.35	0.41	0.08	5.05e-83	3	Sla
5.43e-80	0.35	0.52	0.13	8.28e-76	3	Hexa
1.66e-78	0.35	0.43	0.1	2.53e-74	3	Taok3
2.73e-77	0.35	0.52	0.14	4.17e-73	3	Rnh1
1.41e-75	0.35	0.44	0.1	2.15e-71	3	Neurl3
1.27e-68	0.35	0.64	0.21	1.93e-64	3	Alox5ap
1.50e-61	0.35	0.55	0.18	2.29e-57	3	Cmpk1
8.79e-60	0.35	0.53	0.17	1.34e-55	3	Nipbl
1.14e-55	0.35	0.58	0.22	1.73e-51	3	Ost4
1.21e-53	0.35	0.62	0.25	1.84e-49	3	Fis1
5.46e-281	0.34	0.33	0.01	8.31e-277	3	S1pr5
1.60e-177	0.34	0.34	0.02	2.44e-173	3	Cd274
9.20e-159	0.34	0.34	0.03	1.40e-154	3	Dock5
3.01e-158	0.34	0.35	0.03	4.58e-154	3	Naga
1.21e-139	0.34	0.37	0.04	1.84e-135	3	Trem3
3.06e-125	0.34	0.44	0.06	4.66e-121	3	Vav1
1.77e-119	0.34	0.42	0.06	2.69e-115	3	Sirpb1c
1.27e-103	0.34	0.4	0.06	1.93e-99	3	Irf5
1.51e-99	0.34	0.45	0.08	2.31e-95	3	Tm6sf1
2.80e-93	0.34	0.35	0.06	4.26e-89	3	Bhlhe40
3.25e-88	0.34	0.53	0.12	4.96e-84	3	Ncf2
2.73e-85	0.34	0.41	0.08	4.15e-81	3	Fndc3a
5.90e-81	0.34	0.4	0.08	8.98e-77	3	Wls
8.79e-77	0.34	0.48	0.12	1.34e-72	3	Rbm7
3.55e-75	0.34	0.43	0.1	5.40e-71	3	Abi1
1.88e-67	0.34	0.4	0.1	2.86e-63	3	Gns
7.23e-67	0.34	0.54	0.16	1.10e-62	3	Foxp1
2.85e-64	0.34	0.46	0.13	4.35e-60	3	Capza1
3.39e-63	0.34	0.46	0.13	5.17e-59	3	Rbms1
7.54e-55	0.34	0.58	0.21	1.15e-50	3	Picalm
1.21e-157	0.33	0.32	0.02	1.84e-153	3	Plagl2
2.74e-156	0.33	0.35	0.03	4.17e-152	3	Ggta1
4.05e-145	0.33	0.38	0.04	6.17e-141	3	Lfng
1.83e-136	0.33	0.34	0.04	2.79e-132	3	Nuak2
1.18e-134	0.33	0.31	0.03	1.79e-130	3	Gm6377
2.19e-117	0.33	0.35	0.04	3.34e-113	3	Cat
2.76e-105	0.33	0.37	0.05	4.20e-101	3	Ttc7
3.80e-101	0.33	0.36	0.05	5.79e-97	3	Cd302
2.38e-98	0.33	0.4	0.07	3.62e-94	3	Rnaset2a
1.37e-88	0.33	0.39	0.07	2.09e-84	3	Sec14l1
4.04e-87	0.33	0.4	0.08	6.16e-83	3	Htra2
1.35e-84	0.33	0.38	0.07	2.06e-80	3	Herc4
2.25e-84	0.33	0.43	0.09	3.43e-80	3	Lnpep
1.96e-82	0.33	0.37	0.07	2.99e-78	3	Nfat5
2.21e-73	0.33	0.44	0.11	3.36e-69	3	Xiap
6.09e-68	0.33	0.31	0.06	9.28e-64	3	Rap2a
2.65e-66	0.33	0.47	0.13	4.04e-62	3	Wdr1
1.94e-65	0.33	0.49	0.14	2.96e-61	3	Cbl
3.03e-60	0.33	0.34	0.08	4.62e-56	3	Serpinb6a
3.31e-60	0.33	0.47	0.14	5.04e-56	3	Rab5c
2.32e-59	0.33	0.51	0.16	3.53e-55	3	Tsc22d4
8.10e-59	0.33	0.48	0.15	1.23e-54	3	Dbnl
6.05e-57	0.33	0.3	0.06	9.22e-53	3	Mgst1
1.88e-48	0.33	0.56	0.22	2.86e-44	3	BC005537
2.33e-48	0.33	0.52	0.19	3.54e-44	3	Ppp1r12a
1.31e-37	0.33	0.57	0.26	1.99e-33	3	Crip1
2.58e-31	0.33	0.94	0.84	3.93e-27	3	Eif1
1.41e-157	0.32	0.34	0.03	2.15e-153	3	Slc16a10
1.41e-141	0.32	0.34	0.03	2.15e-137	3	Ldlrad3
2.46e-136	0.32	0.34	0.03	3.74e-132	3	Gsap
1.17e-134	0.32	0.35	0.04	1.78e-130	3	Arhgef10l
1.99e-132	0.32	0.34	0.04	3.03e-128	3	Tmem38b
1.37e-109	0.32	0.35	0.05	2.09e-105	3	Elovl5
1.02e-106	0.32	0.38	0.06	1.55e-102	3	Atf6
5.04e-105	0.32	0.37	0.06	7.68e-101	3	Slc15a4
2.29e-94	0.32	0.38	0.06	3.48e-90	3	Elmo1
3.08e-80	0.32	0.37	0.07	4.69e-76	3	Sik1
1.15e-79	0.32	0.45	0.1	1.75e-75	3	Ifnar2
2.88e-76	0.32	0.4	0.08	4.39e-72	3	Camk2d
4.10e-73	0.32	0.4	0.09	6.24e-69	3	Plxnb2
7.25e-69	0.32	0.38	0.08	1.10e-64	3	Rilpl2
3.24e-68	0.32	0.46	0.12	4.93e-64	3	BC018473
2.36e-63	0.32	0.42	0.11	3.60e-59	3	M6pr
4.23e-53	0.32	0.46	0.15	6.44e-49	3	Tmco1
8.45e-50	0.32	0.51	0.18	1.29e-45	3	Mtpn
9.35e-44	0.32	0.42	0.14	1.42e-39	3	AC149090.1
8.74e-40	0.32	0.65	0.32	1.33e-35	3	Gnb1
1.54e-38	0.32	0.61	0.29	2.35e-34	3	Myl12a
2.58e-24	0.32	0.61	0.37	3.93e-20	3	Mrpl52
5.33e-19	0.32	0.94	0.88	8.11e-15	3	Ubb
5.01e-110	0.31	0.34	0.04	7.63e-106	3	B4galt5
1.09e-109	0.31	0.34	0.04	1.65e-105	3	Dram2
2.82e-97	0.31	0.36	0.06	4.30e-93	3	Acsl5
4.90e-95	0.31	0.39	0.07	7.47e-91	3	Sh3kbp1
5.37e-90	0.31	0.32	0.05	8.18e-86	3	Tifab
7.80e-88	0.31	0.31	0.05	1.19e-83	3	Asph
2.33e-76	0.31	0.37	0.07	3.54e-72	3	Ppp1r15b
1.73e-70	0.31	0.41	0.09	2.64e-66	3	Csf2rb
2.26e-70	0.31	0.43	0.1	3.44e-66	3	Skil
1.98e-69	0.31	0.41	0.09	3.02e-65	3	Vsir
3.32e-63	0.31	0.38	0.09	5.06e-59	3	Pycard
2.42e-59	0.31	0.47	0.14	3.68e-55	3	Qk
4.96e-56	0.31	0.53	0.17	7.55e-52	3	Emp3
8.03e-56	0.31	0.47	0.15	1.22e-51	3	Atp6v0d1
9.30e-52	0.31	0.43	0.14	1.42e-47	3	Eif4g3
3.91e-51	0.31	0.61	0.24	5.96e-47	3	Pim1
1.04e-48	0.31	0.47	0.16	1.58e-44	3	Ppp2r5c
6.47e-43	0.31	0.49	0.19	9.85e-39	3	Pten
4.59e-32	0.31	0.92	0.52	7.00e-28	3	mt-Co2
1.32e-30	0.31	0.65	0.38	2.01e-26	3	Atp6v1f
1.07e-28	0.31	0.79	0.55	1.64e-24	3	Gnb2
1.47e-19	0.31	0.9	0.77	2.24e-15	3	Gapdh
5.74e-195	0.3	0.29	0.01	8.74e-191	3	P2ry10b
1.78e-184	0.3	0.31	0.02	2.71e-180	3	Ebi3
6.66e-137	0.3	0.35	0.04	1.02e-132	3	6430548M08Rik
4.74e-117	0.3	0.33	0.04	7.22e-113	3	Sort1
2.89e-107	0.3	0.33	0.04	4.40e-103	3	Abcc5
1.64e-102	0.3	0.36	0.05	2.50e-98	3	Gpr35
4.24e-102	0.3	0.34	0.05	6.46e-98	3	Acot9
1.31e-93	0.3	0.36	0.06	2.00e-89	3	Ehbp1l1
6.57e-89	0.3	0.34	0.06	1.00e-84	3	Zdhhc6
1.28e-87	0.3	0.37	0.06	1.95e-83	3	Ddhd1
1.57e-86	0.3	0.36	0.06	2.40e-82	3	Pygl
5.43e-86	0.3	0.38	0.07	8.27e-82	3	Bach1
1.64e-78	0.3	0.39	0.08	2.50e-74	3	Mapk14
3.40e-73	0.3	0.34	0.07	5.18e-69	3	Tnfaip8l2
3.18e-71	0.3	0.38	0.08	4.85e-67	3	Itch
1.61e-69	0.3	0.43	0.1	2.46e-65	3	Atp6ap1
2.08e-69	0.3	0.42	0.1	3.17e-65	3	Tnfaip8
2.32e-69	0.3	0.42	0.1	3.53e-65	3	Pkn1
2.91e-65	0.3	0.43	0.11	4.44e-61	3	Tacc1
6.07e-64	0.3	0.38	0.09	9.24e-60	3	Nin
9.66e-64	0.3	0.47	0.13	1.47e-59	3	Adipor1
1.46e-46	0.3	0.45	0.16	2.22e-42	3	Nsd3
1.07e-40	0.3	0.63	0.28	1.63e-36	3	Mbnl1
2.54e-37	0.3	0.55	0.25	3.88e-33	3	Kras
2.55e-35	0.3	0.53	0.23	3.88e-31	3	Fam32a
5.20e-35	0.3	0.4	0.15	7.93e-31	3	Pdcd4
1.49e-34	0.3	0.6	0.3	2.26e-30	3	Eif5b
2.57e-24	0.3	0.67	0.42	3.91e-20	3	Nsa2
2.03e-149	0.29	0.29	0.02	3.10e-145	3	Pilrb1
4.76e-149	0.29	0.33	0.03	7.25e-145	3	Dok1
8.10e-134	0.29	0.32	0.03	1.23e-129	3	Map3k14
1.04e-122	0.29	0.32	0.03	1.59e-118	3	Milr1
1.98e-110	0.29	0.37	0.05	3.01e-106	3	Sirpb1b
3.11e-109	0.29	0.31	0.04	4.74e-105	3	Diaph2
3.69e-108	0.29	0.28	0.03	5.62e-104	3	Rasa4
2.42e-105	0.29	0.67	0.18	3.68e-101	3	Il1b
2.34e-96	0.29	0.36	0.06	3.57e-92	3	Nedd9
9.47e-83	0.29	0.36	0.06	1.44e-78	3	Dock8
9.03e-80	0.29	0.33	0.06	1.38e-75	3	Gpr137b
3.49e-72	0.29	0.35	0.07	5.31e-68	3	Ptpn12
6.41e-71	0.29	0.35	0.07	9.76e-67	3	Atp2c1
2.79e-70	0.29	0.36	0.08	4.25e-66	3	Soat1
4.18e-68	0.29	0.34	0.07	6.37e-64	3	Rnf19b
2.37e-67	0.29	0.37	0.08	3.60e-63	3	Snap23
1.66e-65	0.29	0.41	0.1	2.54e-61	3	Nptn
2.63e-59	0.29	0.39	0.1	4.00e-55	3	Mkln1
6.62e-59	0.29	0.43	0.12	1.01e-54	3	Otulin
6.01e-56	0.29	0.32	0.07	9.16e-52	3	Nfil3
8.26e-54	0.29	0.37	0.1	1.26e-49	3	Eif4ebp1
4.61e-51	0.29	0.4	0.12	7.02e-47	3	Fyn
1.38e-42	0.29	0.37	0.11	2.11e-38	3	Kctd12
7.95e-42	0.29	0.51	0.2	1.21e-37	3	Ywhag
2.75e-38	0.29	0.49	0.2	4.19e-34	3	Mpc2
2.14e-37	0.29	0.61	0.28	3.27e-33	3	Taf10
1.19e-35	0.29	0.64	0.32	1.81e-31	3	Btg2
4.70e-25	0.29	0.75	0.5	7.17e-21	3	Clta
8.87e-236	0.28	0.28	0.01	1.35e-231	3	Sh2d1b1
8.62e-115	0.28	0.31	0.03	1.31e-110	3	Arid3a
3.31e-114	0.28	0.27	0.02	5.04e-110	3	Cdc42ep2
2.39e-105	0.28	0.29	0.03	3.63e-101	3	Crybg3
1.07e-104	0.28	0.28	0.03	1.64e-100	3	Rap1gap2
7.77e-103	0.28	0.3	0.04	1.18e-98	3	Sowahc
4.77e-101	0.28	0.31	0.04	7.26e-97	3	Lyl1
1.02e-100	0.28	0.29	0.04	1.56e-96	3	Ppm1h
1.05e-96	0.28	0.32	0.04	1.60e-92	3	Hsd17b11
4.73e-90	0.28	0.32	0.05	7.20e-86	3	Sgk3
9.19e-87	0.28	0.36	0.06	1.40e-82	3	Plcg2
1.22e-79	0.28	0.37	0.07	1.85e-75	3	Cers6
5.74e-74	0.28	0.33	0.06	8.75e-70	3	Notch2
1.31e-73	0.28	0.32	0.06	1.99e-69	3	Alcam
2.11e-73	0.28	0.38	0.08	3.21e-69	3	Lilr4b
4.63e-69	0.28	0.31	0.06	7.06e-65	3	Fam168a
9.62e-68	0.28	0.37	0.08	1.47e-63	3	Rsu1
1.42e-62	0.28	0.35	0.08	2.17e-58	3	Napg
2.57e-62	0.28	0.65	0.23	3.91e-58	3	Rnf149
4.75e-62	0.28	0.38	0.09	7.23e-58	3	Ifngr2
5.34e-62	0.28	0.38	0.09	8.14e-58	3	Il10rb
1.92e-60	0.28	0.36	0.09	2.92e-56	3	Dgkz
3.45e-58	0.28	0.37	0.09	5.26e-54	3	Trib1
1.65e-53	0.28	0.4	0.11	2.51e-49	3	Cyb5a
1.70e-52	0.28	0.27	0.05	2.59e-48	3	Pltp
4.57e-49	0.28	0.4	0.12	6.96e-45	3	Git2
2.39e-47	0.28	0.36	0.1	3.64e-43	3	Add3
2.76e-47	0.28	0.42	0.13	4.21e-43	3	Ccnd3
1.69e-39	0.28	0.45	0.17	2.57e-35	3	Birc6
1.28e-35	0.28	0.6	0.28	1.95e-31	3	Serp1
1.36e-32	0.28	0.57	0.27	2.08e-28	3	Ier5
2.16e-32	0.28	0.9	0.54	3.30e-28	3	mt-Nd1
5.37e-27	0.28	0.63	0.36	8.18e-23	3	Ywhab
1.01e-171	0.27	0.26	0.01	1.55e-167	3	Ms4a4a
3.21e-119	0.27	0.31	0.03	4.90e-115	3	Apobr
7.30e-101	0.27	0.33	0.04	1.11e-96	3	Pik3r5
1.77e-97	0.27	0.29	0.04	2.70e-93	3	Rasgrp1
2.46e-94	0.27	0.3	0.04	3.75e-90	3	Mkl1
4.60e-72	0.27	0.4	0.09	7.01e-68	3	Sbno2
1.30e-69	0.27	0.3	0.06	1.98e-65	3	Tank
2.29e-67	0.27	0.35	0.07	3.49e-63	3	Ncoa3
1.64e-61	0.27	0.25	0.04	2.50e-57	3	Cbfa2t3
1.38e-54	0.27	0.39	0.1	2.11e-50	3	Fcgr3
2.12e-52	0.27	0.41	0.12	3.23e-48	3	Pdcd6ip
3.68e-52	0.27	0.38	0.11	5.61e-48	3	Cdc42se1
8.01e-48	0.27	0.42	0.13	1.22e-43	3	Slc6a6
1.01e-47	0.27	0.41	0.13	1.54e-43	3	Bnip2
9.56e-44	0.27	0.41	0.13	1.46e-39	3	Ypel3
8.52e-43	0.27	0.39	0.13	1.30e-38	3	Kmt5a
1.84e-41	0.27	0.51	0.19	2.80e-37	3	Snx5
1.07e-40	0.27	0.43	0.15	1.64e-36	3	Asap1
2.53e-39	0.27	0.43	0.16	3.85e-35	3	Spop
7.07e-36	0.27	0.42	0.16	1.08e-31	3	Ssr3
1.44e-35	0.27	0.44	0.17	2.20e-31	3	Ccdc50
4.85e-34	0.27	0.36	0.13	7.39e-30	3	Nufip2
1.43e-33	0.27	0.58	0.28	2.18e-29	3	Mtdh
1.58e-30	0.27	0.73	0.42	2.41e-26	3	Arf1
5.17e-26	0.27	0.79	0.55	7.87e-22	3	Hnrnpf
7.55e-26	0.27	0.58	0.32	1.15e-21	3	Ncor1
5.00e-23	0.27	0.69	0.45	7.61e-19	3	Ube2d3
2.10e-22	0.27	0.44	0.22	3.20e-18	3	Eno1
8.56e-126	0.26	0.27	0.02	1.30e-121	3	L1cam
1.43e-99	0.26	0.32	0.04	2.18e-95	3	G6pdx
1.90e-96	0.26	0.3	0.04	2.89e-92	3	Rnf166
4.23e-93	0.26	0.28	0.04	6.44e-89	3	Tlr7
2.00e-88	0.26	0.34	0.05	3.05e-84	3	Was
1.50e-79	0.26	0.38	0.07	2.28e-75	3	Plbd1
1.57e-75	0.26	0.33	0.06	2.39e-71	3	Stat6
5.40e-75	0.26	0.33	0.06	8.23e-71	3	Arhgap9
6.54e-74	0.26	0.38	0.08	9.96e-70	3	Pde4b
8.32e-70	0.26	0.35	0.07	1.27e-65	3	Aup1
2.66e-63	0.26	0.32	0.07	4.05e-59	3	Rara
3.74e-62	0.26	0.36	0.08	5.70e-58	3	Ogfrl1
3.04e-61	0.26	0.36	0.08	4.63e-57	3	Gusb
1.60e-59	0.26	0.34	0.08	2.44e-55	3	Birc3
1.66e-56	0.26	0.37	0.09	2.52e-52	3	Syngr2
3.31e-53	0.26	0.36	0.09	5.04e-49	3	9930111J21Rik2
4.86e-51	0.26	0.33	0.08	7.40e-47	3	Magt1
2.17e-50	0.26	0.35	0.1	3.31e-46	3	Degs1
6.04e-49	0.26	0.64	0.26	9.21e-45	3	Stk17b
2.63e-48	0.26	0.39	0.12	4.01e-44	3	Pgd
3.61e-47	0.26	0.38	0.11	5.50e-43	3	Mapk3
1.94e-46	0.26	0.36	0.1	2.96e-42	3	Wsb1
5.92e-46	0.26	0.35	0.1	9.02e-42	3	Krit1
7.50e-46	0.26	0.38	0.11	1.14e-41	3	Tab2
1.28e-44	0.26	0.41	0.14	1.95e-40	3	Polr2a
1.03e-41	0.26	0.39	0.13	1.57e-37	3	Klhl24
2.90e-41	0.26	0.38	0.12	4.41e-37	3	Herpud1
1.52e-40	0.26	0.29	0.08	2.32e-36	3	Gadd45b
6.56e-40	0.26	0.37	0.12	1.00e-35	3	Mbnl2
6.33e-39	0.26	0.34	0.11	9.64e-35	3	Unc119
1.79e-37	0.26	0.45	0.18	2.72e-33	3	Psenen
1.26e-27	0.26	0.46	0.22	1.92e-23	3	Mrpl14
1.22e-25	0.26	0.56	0.31	1.87e-21	3	Dync1i2
1.33e-25	0.26	0.69	0.42	2.02e-21	3	Gdi2
4.31e-24	0.26	0.69	0.44	6.57e-20	3	Atp6v0e
2.57e-23	0.26	0.81	0.57	3.91e-19	3	Son
1.27e-133	0.25	0.28	0.02	1.94e-129	3	Klhl5
1.21e-113	0.25	0.28	0.03	1.85e-109	3	Casp1
1.11e-108	0.25	0.28	0.03	1.68e-104	3	Vamp5
1.64e-104	0.25	0.27	0.03	2.50e-100	3	Slc8b1
4.85e-103	0.25	0.32	0.04	7.38e-99	3	Runx2
2.94e-97	0.25	0.29	0.04	4.48e-93	3	Elmo2
6.52e-97	0.25	0.28	0.03	9.93e-93	3	Batf
1.54e-85	0.25	0.3	0.04	2.34e-81	3	St3gal1
1.56e-83	0.25	0.32	0.05	2.37e-79	3	Lpcat2
2.45e-77	0.25	0.31	0.05	3.73e-73	3	Zfp710
5.64e-66	0.25	0.37	0.08	8.59e-62	3	D17Wsu92e
1.37e-65	0.25	0.31	0.06	2.09e-61	3	Cflar
6.44e-65	0.25	0.29	0.05	9.82e-61	3	Phyh
2.89e-62	0.25	0.3	0.06	4.40e-58	3	St3gal4
6.03e-62	0.25	0.34	0.08	9.19e-58	3	Myadm
7.54e-62	0.25	0.33	0.07	1.15e-57	3	Retreg1
2.35e-55	0.25	0.34	0.08	3.58e-51	3	Sept9
3.07e-53	0.25	0.38	0.1	4.68e-49	3	Taf6l
1.19e-52	0.25	0.36	0.1	1.81e-48	3	Pold4
1.84e-51	0.25	0.26	0.05	2.80e-47	3	Dusp6
2.53e-51	0.25	0.31	0.07	3.85e-47	3	Rassf3
1.14e-48	0.25	0.34	0.08	1.74e-44	3	Gda
1.45e-48	0.25	0.41	0.12	2.20e-44	3	Aldh2
1.80e-47	0.25	0.36	0.1	2.74e-43	3	Tor1aip1
3.59e-45	0.25	0.32	0.09	5.47e-41	3	Bri3bp
2.94e-42	0.25	0.35	0.11	4.48e-38	3	Stk4
6.84e-40	0.25	0.43	0.16	1.04e-35	3	Med28
6.21e-39	0.25	0.47	0.18	9.45e-35	3	Prpf38b
1.05e-31	0.25	0.46	0.19	1.60e-27	3	Wdr26
2.73e-31	0.25	0.52	0.24	4.16e-27	3	Rtn4
1.62e-30	0.25	0.53	0.25	2.47e-26	3	Chmp2a
1.73e-28	0.25	0.52	0.25	2.63e-24	3	Chmp4b
1.19e-27	0.25	0.53	0.26	1.82e-23	3	Sdcbp
4.16e-25	0.25	0.6	0.34	6.34e-21	3	Rab14
6.42e-09	0.25	0.73	0.65	9.78e-05	3	Jund
2.29e-104	0.24	0.26	0.02	3.49e-100	3	Nbn
2.36e-97	0.24	0.28	0.03	3.59e-93	3	Tesk1
2.29e-88	0.24	0.3	0.04	3.48e-84	3	Tlr13
1.51e-83	0.24	0.28	0.04	2.30e-79	3	Pik3cg
1.33e-81	0.24	0.28	0.04	2.02e-77	3	Zfyve9
6.25e-80	0.24	0.27	0.04	9.53e-76	3	Xdh
1.02e-73	0.24	0.28	0.04	1.55e-69	3	Scarb1
1.27e-68	0.24	0.3	0.05	1.94e-64	3	Sh2b3
2.17e-68	0.24	0.34	0.07	3.31e-64	3	Pxn
3.12e-66	0.24	0.26	0.04	4.75e-62	3	Dock4
6.34e-66	0.24	0.3	0.06	9.66e-62	3	Cept1
3.46e-64	0.24	0.39	0.09	5.27e-60	3	Hexb
1.43e-59	0.24	0.31	0.06	2.17e-55	3	Vps13c
2.04e-59	0.24	0.31	0.07	3.11e-55	3	Cnppd1
5.95e-59	0.24	0.4	0.1	9.06e-55	3	Ncf1
7.76e-59	0.24	0.31	0.07	1.18e-54	3	Map2k1
1.04e-58	0.24	0.32	0.07	1.58e-54	3	Crlf2
7.90e-56	0.24	0.28	0.06	1.20e-51	3	Mllt6
2.42e-55	0.24	0.35	0.08	3.69e-51	3	Ube2f
5.31e-51	0.24	0.32	0.08	8.09e-47	3	Hsd17b12
2.17e-50	0.24	0.4	0.11	3.31e-46	3	Cmtm7
4.52e-46	0.24	0.33	0.08	6.88e-42	3	Fam105a
1.44e-45	0.24	0.37	0.11	2.19e-41	3	Slk
5.42e-43	0.24	0.36	0.11	8.26e-39	3	Api5
5.71e-43	0.24	0.4	0.13	8.70e-39	3	Ggnbp2
6.17e-43	0.24	0.32	0.09	9.39e-39	3	Gsr
7.28e-43	0.24	0.37	0.11	1.11e-38	3	Abr
1.91e-42	0.24	0.39	0.13	2.91e-38	3	Iscu
3.18e-42	0.24	0.38	0.12	4.84e-38	3	Xbp1
2.11e-39	0.24	0.5	0.19	3.21e-35	3	Wnk1
2.46e-37	0.24	0.59	0.26	3.75e-33	3	S100a11
1.51e-36	0.24	0.39	0.14	2.30e-32	3	Rab8a
9.50e-33	0.24	0.4	0.16	1.45e-28	3	Fam96a
3.22e-32	0.24	0.41	0.16	4.90e-28	3	Ogt
1.49e-30	0.24	0.52	0.24	2.28e-26	3	Pak2
1.03e-29	0.24	0.43	0.18	1.57e-25	3	Brd2
1.40e-29	0.24	0.47	0.21	2.13e-25	3	Rock1
1.13e-28	0.24	0.48	0.22	1.72e-24	3	Arl6ip1
8.01e-25	0.24	0.36	0.15	1.22e-20	3	Rhob
1.60e-21	0.24	0.51	0.28	2.44e-17	3	Bri3
1.79e-20	0.24	0.68	0.43	2.73e-16	3	Pomp
2.89e-20	0.24	0.72	0.49	4.40e-16	3	Scand1
4.20e-16	0.24	0.68	0.49	6.40e-12	3	Cox7a2l
2.38e-152	0.23	0.25	0.01	3.62e-148	3	Smagp
2.61e-96	0.23	0.27	0.03	3.98e-92	3	A630001G21Rik
3.53e-84	0.23	0.27	0.04	5.38e-80	3	Cd300lb
1.81e-83	0.23	0.26	0.03	2.76e-79	3	Pitpnm1
7.37e-83	0.23	0.28	0.04	1.12e-78	3	Slc7a7
4.26e-77	0.23	0.26	0.04	6.48e-73	3	Lrrc8c
3.04e-74	0.23	0.3	0.05	4.63e-70	3	Etv6
3.32e-71	0.23	0.31	0.06	5.06e-67	3	Synj1
1.36e-63	0.23	0.27	0.05	2.08e-59	3	Stxbp3
1.26e-62	0.23	0.3	0.06	1.92e-58	3	Nab1
2.00e-60	0.23	0.3	0.06	3.04e-56	3	Fam129a
4.70e-60	0.23	0.32	0.07	7.16e-56	3	Lasp1
6.36e-59	0.23	0.32	0.07	9.68e-55	3	Zc3hav1
6.64e-58	0.23	0.26	0.05	1.01e-53	3	N4bp2l1
2.92e-55	0.23	0.31	0.07	4.45e-51	3	Pira2
9.40e-54	0.23	0.3	0.07	1.43e-49	3	Cdc42ep3
1.70e-53	0.23	0.32	0.08	2.59e-49	3	Ehd4
1.86e-53	0.23	0.32	0.07	2.84e-49	3	BC017643
2.21e-53	0.23	0.32	0.07	3.36e-49	3	Cast
2.71e-52	0.23	0.34	0.08	4.13e-48	3	Cnpy3
4.20e-50	0.23	0.29	0.07	6.40e-46	3	Map3k1
6.02e-48	0.23	0.31	0.08	9.18e-44	3	Gpr65
1.14e-43	0.23	0.28	0.07	1.74e-39	3	Gfpt1
1.61e-43	0.23	0.39	0.12	2.45e-39	3	Inpp5d
6.36e-43	0.23	0.38	0.12	9.69e-39	3	Safb2
4.10e-42	0.23	0.35	0.1	6.25e-38	3	Psme2
6.97e-42	0.23	0.37	0.11	1.06e-37	3	Tapbp
5.56e-40	0.23	0.39	0.13	8.47e-36	3	Serinc3
2.65e-38	0.23	0.33	0.1	4.04e-34	3	Asah1
1.13e-37	0.23	0.37	0.12	1.73e-33	3	Cmip
1.13e-36	0.23	0.35	0.12	1.73e-32	3	Chmp3
1.66e-35	0.23	0.36	0.12	2.53e-31	3	Tpp2
2.34e-33	0.23	0.36	0.13	3.57e-29	3	Arid4a
2.81e-31	0.23	0.35	0.12	4.28e-27	3	Arl4c
7.66e-27	0.23	0.44	0.2	1.17e-22	3	Snx3
1.07e-26	0.23	0.34	0.14	1.63e-22	3	Thoc2
6.70e-22	0.23	0.81	0.56	1.02e-17	3	Pabpc1
1.40e-21	0.23	0.86	0.63	2.13e-17	3	Rbm39
1.42e-09	0.23	0.63	0.48	2.16e-05	3	Calr
2.77e-105	0.22	0.26	0.02	4.21e-101	3	Arhgap27
1.81e-87	0.22	0.26	0.03	2.76e-83	3	Arhgap39
5.24e-73	0.22	0.26	0.04	7.99e-69	3	Prkch
2.32e-68	0.22	0.26	0.04	3.53e-64	3	Gsdmd
1.27e-66	0.22	0.28	0.05	1.94e-62	3	P4ha1
3.31e-60	0.22	0.3	0.06	5.04e-56	3	Mvp
1.93e-55	0.22	0.3	0.06	2.94e-51	3	Atp1a3
4.25e-55	0.22	0.68	0.28	6.48e-51	3	Ctsd
1.36e-53	0.22	0.28	0.06	2.07e-49	3	Plod3
3.65e-53	0.22	0.37	0.1	5.56e-49	3	Tnfrsf1a
4.99e-52	0.22	0.32	0.08	7.60e-48	3	Fam174a
1.02e-51	0.22	0.3	0.07	1.56e-47	3	Sirt7
2.15e-51	0.22	0.29	0.06	3.28e-47	3	Tnrc18
2.71e-51	0.22	0.31	0.07	4.13e-47	3	Slc12a6
1.66e-48	0.22	0.26	0.06	2.53e-44	3	Osbpl8
4.09e-48	0.22	0.26	0.06	6.24e-44	3	Cpd
3.56e-47	0.22	0.35	0.09	5.42e-43	3	Lyst
3.84e-47	0.22	0.32	0.08	5.84e-43	3	Nr3c1
3.37e-45	0.22	0.38	0.11	5.13e-41	3	Fam107b
3.57e-45	0.22	0.36	0.1	5.44e-41	3	Kansl1
8.73e-44	0.22	0.3	0.08	1.33e-39	3	Il2rg
2.12e-41	0.22	0.31	0.08	3.23e-37	3	Mef2d
2.35e-40	0.22	0.34	0.1	3.58e-36	3	Slc44a2
5.21e-40	0.22	0.28	0.07	7.94e-36	3	Tm9sf4
1.14e-39	0.22	0.36	0.11	1.73e-35	3	Plaur
3.04e-39	0.22	0.34	0.11	4.63e-35	3	Cop1
6.46e-38	0.22	0.3	0.09	9.84e-34	3	Grk6
1.05e-37	0.22	0.31	0.09	1.61e-33	3	Znhit1
6.30e-37	0.22	0.3	0.09	9.60e-33	3	Galnt1
7.11e-37	0.22	0.39	0.14	1.08e-32	3	Ash1l
2.66e-36	0.22	0.35	0.12	4.05e-32	3	5031439G07Rik
1.10e-35	0.22	0.4	0.14	1.68e-31	3	Stag2
1.17e-35	0.22	0.32	0.1	1.78e-31	3	Cyfip1
3.03e-34	0.22	0.39	0.14	4.62e-30	3	Larp4b
4.76e-34	0.22	0.33	0.11	7.25e-30	3	Mknk2
2.04e-33	0.22	0.35	0.12	3.11e-29	3	Lims1
4.97e-32	0.22	0.36	0.13	7.58e-28	3	Cd2ap
2.27e-31	0.22	0.51	0.22	3.46e-27	3	Arf5
3.30e-31	0.22	0.34	0.12	5.02e-27	3	Tprgl
5.00e-30	0.22	0.35	0.13	7.62e-26	3	Arl6ip5
3.92e-28	0.22	0.44	0.2	5.97e-24	3	Syf2
6.71e-28	0.22	0.38	0.15	1.02e-23	3	Higd2a
1.96e-26	0.22	0.53	0.26	2.98e-22	3	Ccdc12
8.45e-24	0.22	0.5	0.25	1.29e-19	3	Clk1
1.53e-23	0.22	0.44	0.22	2.33e-19	3	1110008F13Rik
1.69e-23	0.22	0.36	0.16	2.58e-19	3	Serinc1
2.52e-23	0.22	0.44	0.22	3.83e-19	3	Atp6v1e1
1.09e-22	0.22	0.77	0.53	1.66e-18	3	Lars2
4.03e-21	0.22	0.6	0.35	6.14e-17	3	Gpi1
6.68e-84	0.21	0.25	0.03	1.02e-79	3	Mink1
1.30e-80	0.21	0.25	0.03	1.98e-76	3	Tmc6
5.74e-71	0.21	0.26	0.04	8.75e-67	3	Elf4
1.15e-67	0.21	0.28	0.05	1.76e-63	3	Bak1
1.00e-59	0.21	0.4	0.1	1.53e-55	3	Tnfaip2
2.29e-52	0.21	0.27	0.06	3.49e-48	3	Tpp1
9.26e-52	0.21	0.3	0.07	1.41e-47	3	Acap2
5.33e-51	0.21	0.25	0.05	8.11e-47	3	Fam53b
5.07e-48	0.21	0.28	0.06	7.72e-44	3	Lmbrd1
9.75e-47	0.21	0.29	0.07	1.49e-42	3	Pik3cd
9.94e-46	0.21	0.36	0.1	1.51e-41	3	Stx7
1.89e-45	0.21	0.3	0.08	2.88e-41	3	Limd1
5.26e-45	0.21	0.43	0.14	8.01e-41	3	Zyx
2.73e-44	0.21	0.25	0.06	4.16e-40	3	Chd9
6.03e-43	0.21	0.37	0.11	9.19e-39	3	Ppp1r18
5.39e-42	0.21	0.26	0.06	8.21e-38	3	Madd
7.73e-42	0.21	0.26	0.06	1.18e-37	3	Xpr1
3.34e-41	0.21	0.31	0.09	5.09e-37	3	Cr1l
8.39e-39	0.21	0.31	0.09	1.28e-34	3	Itsn2
1.73e-38	0.21	0.29	0.08	2.63e-34	3	Ist1
4.50e-38	0.21	0.41	0.14	6.86e-34	3	Sri
1.53e-37	0.21	0.33	0.1	2.34e-33	3	Ghitm
1.67e-36	0.21	0.41	0.14	2.55e-32	3	Arhgap45
2.01e-36	0.21	0.27	0.07	3.06e-32	3	Chp1
2.32e-35	0.21	0.32	0.1	3.53e-31	3	Spen
8.74e-35	0.21	0.33	0.11	1.33e-30	3	Ankrd13a
1.14e-34	0.21	0.33	0.11	1.73e-30	3	Dnm2
1.69e-31	0.21	0.34	0.12	2.58e-27	3	Epn1
4.14e-31	0.21	0.29	0.09	6.31e-27	3	Pdha1
6.26e-31	0.21	0.32	0.11	9.54e-27	3	Foxn3
2.81e-30	0.21	0.31	0.1	4.29e-26	3	Mxi1
1.90e-29	0.21	0.48	0.21	2.90e-25	3	Ccnl1
3.90e-27	0.21	0.34	0.13	5.94e-23	3	Emd
1.63e-26	0.21	0.4	0.17	2.48e-22	3	Rbm5
9.18e-25	0.21	0.35	0.15	1.40e-20	3	Baz2b
4.29e-24	0.21	0.49	0.24	6.54e-20	3	Tax1bp1
4.98e-23	0.21	0.3	0.12	7.59e-19	3	Plgrkt
2.10e-22	0.21	0.68	0.41	3.19e-18	3	Sf3b1
2.39e-21	0.21	0.4	0.19	3.64e-17	3	Hectd1
5.03e-21	0.21	0.4	0.19	7.66e-17	3	Ralbp1
2.06e-20	0.21	0.47	0.24	3.14e-16	3	Kmt2e
3.26e-19	0.21	0.45	0.24	4.97e-15	3	Ddx3x
1.54e-18	0.21	0.53	0.3	2.35e-14	3	Ankrd11
6.03e-17	0.21	0.35	0.17	9.18e-13	3	Ifrd1
9.66e-16	0.21	0.72	0.55	1.47e-11	3	Pfdn5
3.25e-56	0.2	0.28	0.05	4.95e-52	3	Man1a
4.76e-56	0.2	0.26	0.05	7.26e-52	3	Rab32
3.99e-55	0.2	0.27	0.05	6.09e-51	3	Stk40
7.97e-54	0.2	0.26	0.05	1.21e-49	3	Myo1c
1.15e-53	0.2	0.26	0.05	1.75e-49	3	Lrmp
3.42e-50	0.2	0.27	0.06	5.21e-46	3	Sel1l
4.43e-50	0.2	0.26	0.06	6.75e-46	3	Rap2b
2.67e-45	0.2	0.27	0.06	4.07e-41	3	Prex1
1.04e-41	0.2	0.29	0.08	1.58e-37	3	Snx10
1.29e-41	0.2	0.27	0.07	1.96e-37	3	D1Ertd622e
6.23e-41	0.2	0.27	0.07	9.49e-37	3	Flii
1.43e-40	0.2	0.3	0.08	2.18e-36	3	Snx1
1.09e-39	0.2	0.3	0.08	1.65e-35	3	Lrp10
3.49e-39	0.2	0.28	0.08	5.32e-35	3	Slc35c2
1.81e-38	0.2	0.32	0.1	2.75e-34	3	Ep300
1.47e-36	0.2	0.29	0.08	2.24e-32	3	Cntrl
1.80e-34	0.2	0.3	0.09	2.74e-30	3	Nfe2l1
2.69e-33	0.2	0.32	0.1	4.10e-29	3	Arf6
1.72e-32	0.2	0.34	0.12	2.61e-28	3	Cdc42se2
2.33e-32	0.2	0.32	0.11	3.56e-28	3	Map7d1
1.69e-31	0.2	0.41	0.16	2.58e-27	3	Mkrn1
2.29e-29	0.2	0.32	0.12	3.49e-25	3	Ube2a
4.54e-29	0.2	0.34	0.12	6.92e-25	3	Hipk1
5.24e-29	0.2	0.3	0.1	7.98e-25	3	Cebpg
5.91e-29	0.2	0.31	0.11	9.00e-25	3	Inpp5f
7.60e-29	0.2	0.27	0.09	1.16e-24	3	Crk
2.08e-28	0.2	0.3	0.11	3.17e-24	3	Tmem123
2.18e-28	0.2	0.38	0.15	3.32e-24	3	Lman2
2.22e-28	0.2	0.36	0.14	3.38e-24	3	Ap2b1
9.91e-28	0.2	0.36	0.14	1.51e-23	3	Emb
1.21e-27	0.2	0.34	0.13	1.84e-23	3	Arfgef1
3.38e-27	0.2	0.91	0.52	5.14e-23	3	mt-Co3
6.79e-26	0.2	0.32	0.13	1.03e-21	3	Mafg
7.18e-26	0.2	0.36	0.15	1.09e-21	3	Akt1
1.28e-25	0.2	0.45	0.2	1.96e-21	3	Spag9
1.40e-25	0.2	0.32	0.12	2.13e-21	3	Rab1a
9.79e-24	0.2	0.32	0.12	1.49e-19	3	Rb1cc1
1.50e-22	0.2	0.44	0.22	2.28e-18	3	Ssu72
5.47e-22	0.2	0.78	0.48	8.33e-18	3	mt-Nd3
7.81e-22	0.2	0.34	0.14	1.19e-17	3	Baz1a
3.15e-21	0.2	0.46	0.24	4.79e-17	3	Lamtor2
4.62e-19	0.2	0.48	0.26	7.04e-15	3	Purb
1.84e-16	0.2	0.67	0.46	2.80e-12	3	Ubl5
1.86e-13	0.2	0.61	0.42	2.83e-09	3	Pcbp2
6.81e-13	0.2	0.66	0.47	1.04e-08	3	Tpr
2.06e-12	0.2	0.66	0.48	3.14e-08	3	Uqcrb
1.55e-67	0.19	0.25	0.04	2.36e-63	3	Bmt2
1.29e-46	0.19	0.25	0.05	1.97e-42	3	Hivep2
4.11e-45	0.19	0.5	0.17	6.26e-41	3	Selplg
1.32e-42	0.19	0.26	0.06	2.02e-38	3	Epb41l2
3.58e-42	0.19	0.27	0.07	5.45e-38	3	Rc3h1
4.51e-42	0.19	0.3	0.08	6.87e-38	3	Erbin
1.37e-40	0.19	0.31	0.09	2.08e-36	3	Wipf1
4.24e-40	0.19	0.25	0.06	6.46e-36	3	Foxn2
2.82e-37	0.19	0.26	0.07	4.29e-33	3	Nfatc3
1.51e-36	0.19	0.28	0.08	2.31e-32	3	Ddi2
2.43e-36	0.19	0.27	0.07	3.70e-32	3	Slc29a1
3.00e-36	0.19	0.28	0.08	4.56e-32	3	Rgs19
2.54e-34	0.19	0.33	0.1	3.87e-30	3	Ets2
1.70e-30	0.19	0.36	0.13	2.59e-26	3	Rab11b
5.92e-30	0.19	0.35	0.13	9.02e-26	3	Derl1
1.31e-29	0.19	0.31	0.11	1.99e-25	3	Glg1
1.48e-29	0.19	0.31	0.11	2.26e-25	3	Ppp3r1
1.35e-28	0.19	0.26	0.08	2.06e-24	3	Nrbp1
1.80e-28	0.19	0.28	0.09	2.74e-24	3	Nfix
5.93e-28	0.19	0.35	0.13	9.03e-24	3	Zfand6
6.05e-28	0.19	0.35	0.13	9.22e-24	3	Wapl
1.20e-27	0.19	0.33	0.12	1.82e-23	3	Jarid2
3.63e-27	0.19	0.3	0.1	5.53e-23	3	Oser1
3.72e-27	0.19	0.32	0.12	5.66e-23	3	Kdm2a
1.16e-26	0.19	0.3	0.11	1.77e-22	3	Vps4b
4.46e-26	0.19	0.32	0.12	6.79e-22	3	Mark2
7.24e-26	0.19	0.34	0.14	1.10e-21	3	Emc7
8.37e-26	0.19	0.34	0.13	1.28e-21	3	Snx18
1.91e-24	0.19	0.34	0.14	2.92e-20	3	Mia2
1.81e-23	0.19	0.35	0.15	2.75e-19	3	Ppp4r2
7.01e-23	0.19	0.39	0.17	1.07e-18	3	Ctsl
2.51e-22	0.19	0.32	0.13	3.83e-18	3	Bcl10
2.61e-22	0.19	0.45	0.22	3.97e-18	3	Psme1
6.65e-22	0.19	0.38	0.18	1.01e-17	3	Tcea1
7.20e-22	0.19	0.3	0.12	1.10e-17	3	Hook3
1.58e-21	0.19	0.38	0.18	2.40e-17	3	Sod1
3.25e-20	0.19	0.54	0.3	4.96e-16	3	Tmem234
1.20e-18	0.19	0.49	0.26	1.83e-14	3	Tra2a
4.53e-18	0.19	0.5	0.27	6.90e-14	3	Dad1
6.52e-18	0.19	0.43	0.23	9.93e-14	3	Map4k4
4.01e-17	0.19	0.49	0.27	6.11e-13	3	Prpf40a
4.95e-13	0.19	0.9	0.75	7.53e-09	3	Oaz1
3.10e-12	0.19	0.72	0.56	4.73e-08	3	Pkm
6.94e-82	0.18	0.32	0.05	1.06e-77	3	Rnase6
2.05e-52	0.18	0.26	0.05	3.13e-48	3	Sgpl1
5.53e-44	0.18	0.27	0.06	8.42e-40	3	Sft2d1
1.18e-39	0.18	0.28	0.07	1.80e-35	3	Prcp
3.00e-39	0.18	0.26	0.06	4.57e-35	3	Myo9b
8.71e-38	0.18	0.37	0.12	1.33e-33	3	Litaf
4.26e-34	0.18	0.29	0.09	6.49e-30	3	Gltp
3.44e-30	0.18	0.29	0.1	5.23e-26	3	Tmed7
3.35e-29	0.18	0.26	0.08	5.10e-25	3	Nsf
3.38e-29	0.18	0.33	0.12	5.14e-25	3	Ube2q1
7.77e-29	0.18	0.34	0.12	1.18e-24	3	Copa
1.01e-28	0.18	0.31	0.11	1.55e-24	3	Riok3
2.69e-28	0.18	0.27	0.09	4.09e-24	3	Usp8
1.51e-27	0.18	0.28	0.1	2.30e-23	3	Fam120a
3.61e-27	0.18	0.26	0.08	5.50e-23	3	Ccm2
2.41e-26	0.18	0.27	0.09	3.67e-22	3	Vamp4
1.63e-25	0.18	0.26	0.09	2.48e-21	3	Vps26a
7.21e-25	0.18	0.4	0.18	1.10e-20	3	Cnih4
9.79e-24	0.18	0.36	0.15	1.49e-19	3	Sdf4
4.28e-23	0.18	0.33	0.14	6.52e-19	3	Phf20l1
7.19e-23	0.18	0.47	0.23	1.10e-18	3	Jak1
1.04e-22	0.18	0.3	0.12	1.59e-18	3	Ppp4r3b
2.15e-22	0.18	0.32	0.13	3.28e-18	3	Dusp11
6.57e-22	0.18	0.33	0.14	1.00e-17	3	Taok1
1.56e-21	0.18	0.34	0.15	2.38e-17	3	Frg1
2.81e-21	0.18	0.43	0.21	4.29e-17	3	Kdm6b
4.93e-21	0.18	0.38	0.18	7.51e-17	3	Sin3b
1.09e-20	0.18	0.42	0.2	1.65e-16	3	Fam104a
1.44e-20	0.18	0.47	0.24	2.19e-16	3	Cwc15
1.16e-19	0.18	0.35	0.16	1.76e-15	3	Ttc14
2.92e-19	0.18	0.44	0.23	4.45e-15	3	Tmem160
3.07e-19	0.18	0.27	0.11	4.68e-15	3	Ppp1r10
1.10e-18	0.18	0.36	0.17	1.68e-14	3	Pdcd10
5.78e-17	0.18	0.38	0.19	8.80e-13	3	Cdc5l
1.06e-16	0.18	0.57	0.34	1.61e-12	3	H2afj
2.93e-16	0.18	0.42	0.23	4.46e-12	3	Papola
4.24e-16	0.18	0.51	0.3	6.46e-12	3	Luc7l2
5.50e-16	0.18	0.46	0.26	8.38e-12	3	Eif4a2
9.82e-14	0.18	0.72	0.54	1.50e-09	3	Morf4l1
1.60e-13	0.18	0.84	0.67	2.44e-09	3	Atp5l
1.10e-12	0.18	0.73	0.55	1.67e-08	3	Ppp1ca
1.31e-12	0.18	0.56	0.38	1.99e-08	3	Prrc2c
9.00e-12	0.18	0.54	0.37	1.37e-07	3	Ndufa6
1.12e-11	0.18	0.49	0.31	1.70e-07	3	Pgam1
2.89e-07	0.18	0.67	0.55	4.41e-03	3	Dnaja1
2.89e-38	0.17	0.72	0.36	4.40e-34	3	Junb
1.44e-37	0.17	0.26	0.06	2.20e-33	3	Gmip
3.24e-37	0.17	0.26	0.07	4.94e-33	3	Nek7
2.18e-36	0.17	0.25	0.06	3.31e-32	3	Il16
3.08e-35	0.17	0.25	0.07	4.70e-31	3	Sptlc2
2.61e-34	0.17	0.45	0.17	3.97e-30	3	Sorl1
5.78e-33	0.17	0.29	0.09	8.81e-29	3	Mia3
7.50e-33	0.17	0.28	0.08	1.14e-28	3	Ythdf3
1.65e-32	0.17	0.28	0.08	2.52e-28	3	Rasgrp2
3.30e-31	0.17	0.28	0.09	5.03e-27	3	Ccnt2
2.98e-30	0.17	0.26	0.08	4.55e-26	3	Ino80d
3.12e-30	0.17	0.28	0.09	4.76e-26	3	Susd6
3.34e-30	0.17	0.27	0.08	5.09e-26	3	Marc2
4.94e-30	0.17	0.29	0.09	7.52e-26	3	Atp13a2
8.69e-30	0.17	0.25	0.08	1.32e-25	3	Far1
3.64e-29	0.17	0.28	0.09	5.55e-25	3	Twf2
4.88e-29	0.17	0.26	0.08	7.44e-25	3	Arhgef2
1.36e-28	0.17	0.27	0.09	2.06e-24	3	Cdc40
3.07e-28	0.17	0.28	0.09	4.68e-24	3	Tmem30a
3.34e-28	0.17	0.26	0.08	5.09e-24	3	Baz2a
5.73e-28	0.17	0.26	0.08	8.72e-24	3	Snapc5
7.97e-28	0.17	0.32	0.12	1.21e-23	3	Cab39
9.95e-28	0.17	0.26	0.08	1.52e-23	3	Bdp1
1.71e-27	0.17	0.27	0.09	2.61e-23	3	Fam50a
7.79e-27	0.17	0.26	0.09	1.19e-22	3	Blvra
8.01e-26	0.17	0.3	0.11	1.22e-21	3	Ranbp2
2.26e-24	0.17	0.31	0.12	3.44e-20	3	Dlst
2.41e-24	0.17	0.27	0.1	3.66e-20	3	Adprh
3.83e-24	0.17	0.32	0.12	5.83e-20	3	Bcap31
6.93e-24	0.17	0.26	0.09	1.06e-19	3	Ncor2
1.56e-23	0.17	0.32	0.12	2.38e-19	3	Selenot
6.75e-23	0.17	0.27	0.1	1.03e-18	3	Lbh
1.71e-21	0.17	0.3	0.12	2.61e-17	3	Fam111a
1.93e-21	0.17	0.32	0.13	2.94e-17	3	Rbm42
2.61e-21	0.17	0.34	0.15	3.98e-17	3	Vps35
5.51e-21	0.17	0.33	0.14	8.39e-17	3	Brd7
9.12e-21	0.17	0.38	0.18	1.39e-16	3	Pet100
1.84e-20	0.17	0.28	0.11	2.80e-16	3	Trappc1
2.24e-20	0.17	0.3	0.13	3.41e-16	3	Parl
4.90e-20	0.17	0.33	0.15	7.47e-16	3	Mapk1
1.47e-19	0.17	0.27	0.11	2.25e-15	3	Cnot6l
7.24e-19	0.17	0.34	0.15	1.10e-14	3	Brd4
7.35e-19	0.17	0.34	0.15	1.12e-14	3	Chic2
9.65e-19	0.17	0.26	0.11	1.47e-14	3	Hist1h1c
1.42e-17	0.17	0.4	0.2	2.16e-13	3	Pnisr
6.51e-17	0.17	0.42	0.22	9.92e-13	3	Reep5
1.67e-16	0.17	0.56	0.33	2.54e-12	3	Selenok
3.71e-15	0.17	0.33	0.17	5.65e-11	3	Hnrnpul2
1.62e-14	0.17	0.43	0.25	2.47e-10	3	Ier3ip1
4.07e-14	0.17	0.34	0.18	6.19e-10	3	Phf3
1.03e-13	0.17	0.45	0.26	1.57e-09	3	Canx
6.85e-13	0.17	0.6	0.41	1.04e-08	3	Rbm25
1.24e-12	0.17	0.53	0.34	1.89e-08	3	Cox6a1
1.65e-12	0.17	0.6	0.41	2.51e-08	3	Fus
1.97e-12	0.17	0.48	0.3	2.99e-08	3	Bax
8.52e-10	0.17	0.7	0.54	1.30e-05	3	Jpt1
1.09e-06	0.17	0.28	0.17	1.66e-02	3	Cstb
4.14e-40	0.16	0.27	0.07	6.30e-36	3	Cd300lf
4.78e-30	0.16	0.3	0.1	7.28e-26	3	2900097C17Rik
1.48e-28	0.16	0.26	0.08	2.25e-24	3	Zmynd8
2.38e-28	0.16	0.28	0.09	3.62e-24	3	Arhgap15
2.62e-27	0.16	0.29	0.1	3.99e-23	3	Zmiz2
1.57e-26	0.16	0.26	0.08	2.39e-22	3	Tmem259
2.18e-25	0.16	0.32	0.12	3.32e-21	3	Rsf1
2.63e-25	0.16	0.27	0.09	4.01e-21	3	Aip
3.06e-25	0.16	0.28	0.1	4.66e-21	3	Ociad1
4.73e-25	0.16	0.28	0.1	7.21e-21	3	Lsm14a
2.40e-24	0.16	0.26	0.09	3.65e-20	3	Ap3s1
9.35e-24	0.16	0.28	0.1	1.42e-19	3	Csnk1d
2.49e-23	0.16	0.3	0.12	3.80e-19	3	Tmbim4
3.08e-23	0.16	0.25	0.09	4.70e-19	3	Tmem33
1.28e-22	0.16	0.32	0.13	1.95e-18	3	Commd6
1.94e-22	0.16	0.3	0.11	2.95e-18	3	Ppp1r15a
2.66e-22	0.16	0.26	0.09	4.05e-18	3	Arid5b
6.70e-22	0.16	0.26	0.1	1.02e-17	3	Upf2
7.66e-22	0.16	0.27	0.1	1.17e-17	3	Acaa1a
1.29e-21	0.16	0.27	0.1	1.96e-17	3	Dctn4
1.97e-20	0.16	0.45	0.22	3.01e-16	3	Rab7
7.50e-20	0.16	0.25	0.1	1.14e-15	3	Ptpn11
2.67e-19	0.16	0.36	0.17	4.07e-15	3	Nrd1
3.65e-19	0.16	0.37	0.17	5.56e-15	3	Rtn3
3.79e-17	0.16	0.3	0.14	5.78e-13	3	N4bp2l2
1.32e-16	0.16	0.34	0.17	2.02e-12	3	Zfp207
3.96e-16	0.16	0.45	0.25	6.03e-12	3	Mycbp2
1.27e-15	0.16	0.41	0.22	1.94e-11	3	Supt4a
6.72e-15	0.16	0.28	0.13	1.02e-10	3	Tle4
1.42e-14	0.16	0.53	0.33	2.17e-10	3	Tra2b
1.46e-14	0.16	0.39	0.21	2.23e-10	3	Smchd1
1.16e-13	0.16	0.36	0.2	1.77e-09	3	Yy1
4.57e-13	0.16	0.33	0.18	6.96e-09	3	Esd
7.62e-13	0.16	0.41	0.24	1.16e-08	3	Srrm1
1.42e-12	0.16	0.48	0.3	2.16e-08	3	Dnajc8
3.47e-11	0.16	0.53	0.36	5.29e-07	3	Smdt1
9.25e-11	0.16	0.73	0.57	1.41e-06	3	Slc25a5
3.40e-51	0.15	0.38	0.1	5.18e-47	3	Selenop
9.06e-24	0.15	0.29	0.11	1.38e-19	3	Smg1
3.34e-22	0.15	0.26	0.09	5.09e-18	3	Os9
3.28e-21	0.15	0.28	0.11	5.00e-17	3	Setd2
3.29e-21	0.15	0.27	0.1	5.01e-17	3	Gsto1
5.92e-21	0.15	0.29	0.11	9.01e-17	3	Rtf2
1.22e-20	0.15	0.26	0.1	1.86e-16	3	Stt3b
1.80e-20	0.15	0.3	0.12	2.74e-16	3	Herc1
2.67e-20	0.15	0.25	0.1	4.06e-16	3	Gna13
3.36e-20	0.15	0.28	0.12	5.11e-16	3	Azin1
5.76e-20	0.15	0.27	0.11	8.78e-16	3	Atp6v1a
5.86e-20	0.15	0.31	0.13	8.92e-16	3	Trip12
9.17e-20	0.15	0.3	0.12	1.40e-15	3	Smim14
2.38e-19	0.15	0.28	0.11	3.63e-15	3	Gatad2b
4.20e-18	0.15	0.31	0.14	6.40e-14	3	Sptan1
9.49e-18	0.15	0.27	0.11	1.45e-13	3	Gps2
2.29e-17	0.15	0.38	0.19	3.48e-13	3	Cltc
3.31e-17	0.15	0.3	0.14	5.04e-13	3	Mbd2
1.09e-16	0.15	0.36	0.18	1.67e-12	3	Tm9sf3
5.56e-16	0.15	0.41	0.22	8.47e-12	3	Dbi
6.46e-16	0.15	0.38	0.2	9.84e-12	3	Lamtor5
2.55e-15	0.15	0.39	0.2	3.89e-11	3	Rabac1
3.98e-15	0.15	0.28	0.13	6.06e-11	3	Ankrd12
5.96e-15	0.15	0.33	0.17	9.08e-11	3	Crebbp
8.76e-11	0.15	0.43	0.27	1.33e-06	3	Sfr1
9.11e-10	0.15	0.84	0.73	1.39e-05	3	Sem1
9.10e-88	1.18	0.99	0.52	1.39e-83	4	mt-Atp6
4.07e-70	1.1	0.97	0.52	6.21e-66	4	mt-Co3
7.57e-70	1.06	0.97	0.52	1.15e-65	4	mt-Co2
5.47e-53	1.06	0.97	0.58	8.34e-49	4	mt-Co1
1.33e-51	0.83	0.92	0.52	2.02e-47	4	mt-Nd2
3.79e-60	0.81	0.93	0.51	5.78e-56	4	mt-Cytb
1.01e-51	0.7	0.94	0.57	1.54e-47	4	mt-Nd4
1.36e-43	0.66	0.82	0.48	2.07e-39	4	mt-Nd3
5.37e-38	0.63	0.89	0.54	8.17e-34	4	mt-Nd1
2.94e-17	0.38	0.61	0.38	4.47e-13	4	mt-Nd5
7.53e-16	0.36	0.5	0.32	1.15e-11	4	mt-Atp8
1.45e-15	0.33	0.44	0.27	2.21e-11	4	mt-Nd4l
5.28e-03	0.2	0.81	0.85	1.00e+00	4	Malat1
0.00e+00	5.05	0.88	0.01	0.00e+00	5	S100a9
0.00e+00	4.69	0.86	0.01	0.00e+00	5	S100a8
0.00e+00	2.94	0.81	0.03	0.00e+00	5	Cxcl2
0.00e+00	2.92	0.95	0.16	0.00e+00	5	Il1b
0.00e+00	2.77	0.58	0	0.00e+00	5	Retnlg
0.00e+00	2.52	0.95	0.14	0.00e+00	5	Cd14
2.59e-229	2.38	0.98	0.31	3.95e-225	5	Srgn
0.00e+00	2.36	0.77	0.02	0.00e+00	5	G0s2
2.36e-209	2.23	0.91	0.25	3.60e-205	5	Cebpb
0.00e+00	2.15	0.95	0.01	0.00e+00	5	Hdc
0.00e+00	2.1	0.94	0.04	0.00e+00	5	Mxd1
8.56e-201	2.1	0.96	0.35	1.30e-196	5	Junb
0.00e+00	2.09	0.79	0.02	0.00e+00	5	Ifitm1
1.20e-214	2.04	0.93	0.26	1.82e-210	5	Dusp1
0.00e+00	1.97	0.46	0	0.00e+00	5	Lcn2
0.00e+00	1.97	0.66	0	0.00e+00	5	Wfdc21
1.38e-205	1.95	0.96	0.35	2.10e-201	5	Mcl1
0.00e+00	1.93	0.93	0.04	0.00e+00	5	Csf3r
0.00e+00	1.87	0.85	0.01	0.00e+00	5	Il1r2
1.21e-255	1.77	0.95	0.22	1.84e-251	5	Msrb1
0.00e+00	1.73	0.83	0.07	0.00e+00	5	Tnfaip2
1.16e-125	1.72	0.8	0.28	1.76e-121	5	Nfkbia
1.08e-197	1.71	0.96	0.31	1.64e-193	5	Ifitm2
5.29e-202	1.69	0.9	0.24	8.06e-198	5	S100a11
6.49e-116	1.67	0.98	0.72	9.89e-112	5	Fth1
1.27e-206	1.62	0.93	0.25	1.93e-202	5	Neat1
2.35e-177	1.62	0.92	0.3	3.58e-173	5	Btg2
1.28e-246	1.6	0.93	0.22	1.95e-242	5	Rnf149
0.00e+00	1.59	0.86	0	0.00e+00	5	Cxcr2
0.00e+00	1.55	0.82	0.07	0.00e+00	5	Clec4e
0.00e+00	1.55	0.76	0.01	0.00e+00	5	Lrg1
0.00e+00	1.51	0.57	0	0.00e+00	5	Acod1
0.00e+00	1.49	0.79	0.08	0.00e+00	5	Hp
0.00e+00	1.46	0.87	0.07	0.00e+00	5	Ets2
1.62e-207	1.44	0.96	0.27	2.46e-203	5	Fxyd5
5.39e-220	1.43	0.59	0.07	8.21e-216	5	Ccrl2
5.88e-188	1.43	0.86	0.23	8.95e-184	5	Pim1
5.90e-278	1.42	0.84	0.14	9.00e-274	5	Grina
1.95e-186	1.41	0.98	0.28	2.97e-182	5	Tyrobp
0.00e+00	1.39	0.76	0.06	0.00e+00	5	Slc16a3
0.00e+00	1.39	0.82	0.02	0.00e+00	5	Ccr1
7.97e-136	1.39	0.96	0.41	1.21e-131	5	Btg1
0.00e+00	1.38	0.78	0.02	0.00e+00	5	Trem1
1.05e-287	1.35	0.78	0.1	1.61e-283	5	Dennd4a
0.00e+00	1.34	0.69	0.02	0.00e+00	5	Slc7a11
6.30e-193	1.32	0.93	0.27	9.60e-189	5	Lcp1
8.69e-237	1.31	0.7	0.09	1.32e-232	5	Plaur
1.51e-185	1.3	0.89	0.24	2.30e-181	5	Stk17b
9.01e-107	1.3	0.99	0.86	1.37e-102	5	Actg1
0.00e+00	1.28	0.71	0	0.00e+00	5	Mmp9
1.49e-117	1.28	0.74	0.22	2.27e-113	5	S100a6
2.49e-115	1.27	0.52	0.1	3.79e-111	5	Wfdc17
7.46e-178	1.26	0.9	0.28	1.14e-173	5	Tpd52
7.12e-129	1.26	0.46	0.07	1.08e-124	5	Gadd45b
0.00e+00	1.25	0.77	0.04	0.00e+00	5	Cd300lf
4.40e-207	1.25	0.88	0.2	6.70e-203	5	Alox5ap
1.55e-208	1.24	0.76	0.13	2.37e-204	5	Cd9
0.00e+00	1.23	0.8	0.1	0.00e+00	5	Litaf
7.03e-89	1.22	0.63	0.21	1.07e-84	5	Cdk2ap2
6.38e-232	1.21	0.82	0.15	9.71e-228	5	Sorl1
3.37e-133	1.2	0.79	0.23	5.13e-129	5	Zfp36
2.33e-173	1.19	0.78	0.18	3.55e-169	5	Samsn1
9.48e-236	1.18	0.76	0.12	1.44e-231	5	Zyx
1.18e-171	1.18	0.78	0.18	1.80e-167	5	Plek
1.20e-156	1.17	0.68	0.14	1.82e-152	5	Egr1
3.02e-111	1.17	0.8	0.3	4.61e-107	5	Fos
0.00e+00	1.15	0.71	0.02	0.00e+00	5	Cd33
3.31e-193	1.15	0.77	0.15	5.05e-189	5	Selplg
0.00e+00	1.14	0.74	0.07	0.00e+00	5	Lyst
0.00e+00	1.14	0.63	0.03	0.00e+00	5	Plk3
0.00e+00	1.14	0.74	0.07	0.00e+00	5	Gcnt2
1.91e-179	1.14	0.68	0.12	2.91e-175	5	2810474O19Rik
4.10e-164	1.12	0.8	0.2	6.24e-160	5	Cd44
1.94e-286	1.11	0.68	0.06	2.95e-282	5	Pglyrp1
5.44e-202	1.11	0.66	0.09	8.29e-198	5	Nfkbiz
8.19e-195	1.11	0.88	0.21	1.25e-190	5	Spi1
2.36e-172	1.11	0.8	0.2	3.60e-168	5	Picalm
0.00e+00	1.1	0.68	0.03	0.00e+00	5	Clec4d
2.54e-250	1.1	0.77	0.11	3.87e-246	5	Ncf2
0.00e+00	1.09	0.54	0.01	0.00e+00	5	Rdh12
0.00e+00	1.09	0.66	0.04	0.00e+00	5	Ier3
1.84e-289	1.09	0.41	0.02	2.80e-285	5	Ptgs2
4.39e-50	1.09	0.4	0.12	6.68e-46	5	BC018473
9.35e-179	1.08	0.8	0.19	1.42e-174	5	Kdm6b
1.50e-89	1.07	0.79	0.31	2.29e-85	5	Zfp36l2
1.51e-280	1.06	0.68	0.07	2.30e-276	5	Fosl2
4.67e-277	1.06	0.7	0.07	7.11e-273	5	Cyp4f18
7.85e-259	1.06	0.37	0.01	1.20e-254	5	Mmp8
2.08e-126	1.06	0.88	0.34	3.17e-122	5	Iqgap1
4.42e-145	1.04	0.76	0.22	6.74e-141	5	Lmnb1
4.35e-132	1.04	0.91	0.32	6.63e-128	5	Ptprc
4.74e-86	1.04	1	0.84	7.23e-82	5	Malat1
0.00e+00	1.03	0.6	0.02	0.00e+00	5	Adam8
2.29e-248	1.03	0.68	0.09	3.49e-244	5	Ndel1
7.76e-273	1.02	0.6	0.05	1.18e-268	5	Ptafr
0.00e+00	1.01	0.63	0.02	0.00e+00	5	Fgl2
1.44e-233	1.01	0.61	0.07	2.19e-229	5	Lilr4b
2.09e-146	1.01	0.77	0.22	3.19e-142	5	Pnrc1
7.30e-118	1	0.82	0.34	1.11e-113	5	Map1lc3b
6.61e-132	0.99	0.93	0.31	1.01e-127	5	Cd52
9.52e-106	0.99	0.86	0.4	1.45e-101	5	Taldo1
0.00e+00	0.98	0.7	0.03	0.00e+00	5	C5ar1
1.83e-92	0.98	0.62	0.2	2.79e-88	5	Gdpd3
1.30e-79	0.98	0.82	0.46	1.99e-75	5	Marcks
1.90e-120	0.97	0.71	0.2	2.89e-116	5	Slfn2
1.03e-77	0.97	0.61	0.21	1.57e-73	5	Cxcr4
0.00e+00	0.96	0.3	0	0.00e+00	5	Stfa2l1
2.44e-265	0.96	0.38	0.01	3.71e-261	5	Csf1
1.74e-244	0.96	0.75	0.1	2.65e-240	5	Emilin2
0.00e+00	0.95	0.63	0.03	0.00e+00	5	Csrnp1
2.28e-190	0.94	0.69	0.12	3.48e-186	5	Adipor1
0.00e+00	0.92	0.62	0.02	0.00e+00	5	Slfn1
2.51e-141	0.92	0.71	0.18	3.83e-137	5	Nudt4
0.00e+00	0.91	0.56	0.02	0.00e+00	5	Nlrp3
5.03e-106	0.91	0.88	0.43	7.67e-102	5	Gabarap
3.53e-81	0.91	1	0.94	5.38e-77	5	Actb
1.18e-146	0.9	0.8	0.21	1.79e-142	5	Ncf4
4.11e-118	0.9	0.68	0.2	6.26e-114	5	Ccnl1
4.83e-219	0.88	0.63	0.08	7.36e-215	5	Trib1
1.02e-148	0.87	0.66	0.14	1.56e-144	5	March7
3.85e-90	0.87	0.77	0.32	5.87e-86	5	Ptpn1
0.00e+00	0.86	0.64	0.05	0.00e+00	5	Pygl
3.81e-157	0.86	0.67	0.13	5.80e-153	5	Zcchc6
2.93e-138	0.86	0.49	0.07	4.46e-134	5	Anxa1
4.45e-138	0.86	0.96	0.28	6.77e-134	5	Fcer1g
6.42e-116	0.86	0.8	0.26	9.77e-112	5	Gmfg
2.70e-134	0.84	0.43	0.06	4.12e-130	5	Cdkn1a
2.38e-122	0.84	0.76	0.22	3.63e-118	5	Anxa2
0.00e+00	0.83	0.43	0.01	0.00e+00	5	Osm
0.00e+00	0.83	0.31	0	0.00e+00	5	Asprv1
5.43e-247	0.83	0.58	0.05	8.28e-243	5	Cebpd
[truncated: 6,351 more rows]

## Sheet: Suppl Table 3
Supplementary Table 3: List of the various signatures that have been plotted in our study.
M1 (Cheng-2021)	M2 (Cheng-2021)	Angiogenesis (Cheng-2021)	Phagocytosis (Cheng-2021)	Top 20 Cluster 5 mouse	Mouse activatd PMN-MDSCs (Veglia-2021)	Mouse PMN-MDSCs (Veglia-2021)	CAF-S1 (Pelon-2020)	CAF-S4 (Pelon-2020)	iCAF (Ohlund-2017)	myCAF (Ohlund-2017)	Human PMN-MDSCs (Veglia-2021)
IL23	IL4R	CCND2	MRC1	S100a9	Ccl4	Ngp	DAB2	C21orf7	Csf3	Gjb2	AQP9
TNF	CCL4	CCNE1	CD163	S100a8	Ccl3	Camp	LRRC15	MCAM	Il21	Col2a1	BCL2A1
CXCL9	CCL13	CD44	MERTK	Cxcl2	Cxcl3	Ltf	FBN1	MEF2C	S100a8	Pkp1	C19orf59
CXCL10	CCL20	CXCR4	C1QB	Il1b	Jun	Chil3	TSKU	MOCS1	Saa1	Tll1	C5AR1
CXCL11	CCL17	E2F3		Retnlg	Ccrl2	Lcn2	COL11A1	PTP4A3	Kcnj15	Cdh10	CCL18
CD86	CCL18	EDN1		Cd14	Saa3	Iftm6	CTHRC1	NRIP2	Il13ra2	Crabp1	CCL20
IL1A	CCL22	EZH2		Srgn	Spp1	Lyz2	MMP13	MYH11	Il6	Tnnt2	CD300E
IL1B	CCL24	FGF18		G0s2	Gad45b	Cybb	PTGFRN	PARM1	Saa3	Rmrp	CTSC
IL6	LYVE1	FGFR1		Cebpb	Il1b	Serpinb1a	THBS2	CDH6	Hp	Hck	CXCL1
CCL5	VEGFA	FYN		Hdc	Ninj1	Cd177	MXRA5	GJA4	Il1a	Fam38b	CXCL2
IRF5	VEGFB	HEY1		Mxd1	Clec4n	Anxa1	COMP	CACNB2	Cxcl3	Gjb3	CXCL3
IRF1	VEGFC	ITGAV		Junb	Hcar2	Aldh2	EMP1	OR51E1	Gpr84	Ncrna00086	CXCL5
CD40	VEGFD	JAG1		Ifitm1	Basp1	Mmp8	ODZ4	LINGO1	H2-Q10	Dock8	CXCL6
IDO1	EGF	JAG2		Dusp1	Nfkbia	Adpgk	LUM	ESAM	Il11	Acsbg1	CXCR1
KYNU	CTSA	MMP9		Lcn2	Btg1	Dstn	MORC4	NDUFA4L2	Cxcl2	Itih2	CXCR2
CCR7	CTSB	NOTCH1		Wfdc21	Il1rn	Arhgdib	COL10A1	PPP1R14A	Cxcl1	Cdh18	EMR2
	CTSC	PDGFA		Mcl1	Ifrd1	S100a8	GAS7	CASQ2	Spink5	Shank2	EMR3
	CTSD	PTK2		Csf3r	Txnip	AA467197	MMP2	COX4I2	Saa4	Mogat2	FCGR3B
	TGFB1	SPP1		Il1r2	Ccl9	Tkt	EPYC	ABTB1	Ndufa4l2	Car6	FGR
	TGFB2	STC1		Msrb1	Ier3	Wfdc21	PTGIS	ACAN	Prdm1	Acta2	FPR1
	TGFB3	TNFAIP6			Ier5	Capg	CST1	MICAL1	Pnpla3	Klhdc8a	FPR2
	MMP14	TYMP			Rs1	Cebpe	SPOCK1	ENPEP	Irg1	Bcat1	GPR97
	MMP19	VAV2			Thbs1	S100a9	MMP3	FHL5	Nos2	1700024P16Rik	HCK
	MMP9	VCAN			Cxcl1	Syn1	LOX	LDB3	Ism1	Cdh3	HK3
	CLEC7A	VEGFA			Hilpda	Pglyrp1	VDR	MYOCD	Lif	Lipg	ICAM1
	WNT7B				Hist1h1c	Ltb4r1	PPAPDC1A	DGKG			IL15RA
	FASL				Srgn	Lgals3	DIO2	ADAP2			IL1B
	TNFSF12				Hspa5	Tmsb10	SYNDIG1	SEMA5B			IL1R2
	TNFSF8				Csf1	Olfm4	EPB41L3	ARHGEF17			IL2RA
	CD276				Pgts2	Hmgn2	CCDC80	GPR20			IL6
	VTCN1				Xbp1	Ceacam10	MOXD1	RGS5			IL8
	MSR1					H2afz	MXRA8	ACTC1			LILRA3
	FN1						KLHL4	ITGA7			LILRA5
	IRF4						PDGFRA	PLN			LILRA6
							FNDC1	RCSD1			LIRRB2
							PLAU	LGI4			LILRB3
							TNFSF4	TRPC6			LYN
							CYP1B1	DPY19L2			MEFV
							SLC20A1	REM1			MMP12
							KERA	RERGL			NCF2
							COL1A2	SLC35F1			OSM
							MPZL1	GJC1			PLAUR
							F13A1	NFASC			PTAFR
							LTBP2	NRARP			S100A12
							PDGFRL	SOX5			S100A8
							C1S	KCNK17			S100A9
							ALDH1A3	RASGRP2			SERPINB8
							LRP1	NEURL1B			SLC11A1
							RTN4	TMEM74B			SOD2
							COL6A3	DGKB			TREM1
							CHPF	TBX2
							ENPP1	PDE3A
							SHISA2	SLC38A11
							CCL11	TINAGL1
							FRMD6	ATP1A2
							COL3A1	ARHGAP44
							TMEM119	CABP1
							CGREF1	GPR4
							C3	OAZ2
							WNT2	RASD2
							GFPT2	TRPC4
							COPZ2	KCNA5
							NHSL1	FADS3
							VCAN	GPR116
							MFAP5	SCN4B
							PODN	FAM162B
							SERINC2	KCNMB1
							DPEP1	JPH2
							LOC283867	KIAA1274
							GPR1	LGALSL
							CNIH3	LRRC10B
							ITGA11	CD4
							SURF4	OR51E2
							SFRP2	HEY2
							GLT8D2	SPTB
							LMCD1	HIGD1B
							RPN1	ABCC9
							SFRP4	PPP1R12B
							UAP1	GABRD
							CERCAM	ATP1B2
							SPON1	ZAK
							IGJ	RBPMS
							DCN	PGF
							KCNK2	PPP1R12A
							COL1A1	A2M
							MFSD2A	APOLD1
							BCL6B	AGAP11
							MRC2	AKAP6
							CILP	SUSD5
							C1QTNF3	PDGFA
							ASAP3	AOC3
							MFAP2	ARID5A
							SCN7A	P2RY14
							KDELR2	HTR1F
							TEK	SERPINI1
							NUCB2	CBFA2T3
							PRICKLE1	CCR10
							SLC1A5	HRC
							WNT2B	NOTCH3
							KLK4	MYOM1
							EFEMP1	RBPMS2
							P4HB	KCNK3
							HSD17B6	CSPG4
							CILP2	COL18A1
							CHRDL1	CSRP2
							GJA1	2004-09-01
							TPST1	MAP2
							CYP11A1	WFDC1
							GPR133	ANGPT1
							DEPDC7	PCDH1
							GPX8	CACNA1H
							COLEC12	PPARGC1B
							KDELR3	CRYAB
							LXN	CTNNA3
							BMP4	EEF1DP3
							KIAA0930	CPM
							SEMA3D	ANGPT2
							CYBRD1	GMFG
							NRK	RCAN2
							TSPAN18	KIAA1751
							PLXDC2	SEPT7P2
							ADAM12	HEYL
							HSPA12B	LYPD1
							KCNJ6	FRMD3
							TMED10	MAPRE2
							UGDH	LBH
							TSHZ3	C3orf70
							LOXL1	EPAS1
							MEG3	FBLIM1
							XPNPEP2	LAMA5
							FAP	RASL11A
							IGFL2	PTPLA
							PENK	DMPK
							DRP2	DAAM2
							ADD2	RGS6
							COL8A1	EPS8
							CELF2	PLEKHH3
							P4HA1	PRPH
							SKIL	ITIH4
							PYCR1	CCDC102B
							IGF1	FOXC2
							XG	HRH2
							STEAP2	SLCO1C1
							GRINA	ASB2
							COL16A1	HIP1
							SLC41A2	ARHGAP26
							HMCN1	PTK2
							SCML2	UTRN
							IRX6	ACTG2
							CMYA5	PLXND1
							ADC	EGFL6
							HOOK1	SPRY4
							BZW1	LZTS1
							CRABP2	FAM13C
							RSAD2	SMTN
							EGR2	FOXS1
							WT1	ATP8B1
							ISLR	KCNJ8
							LOC100288077	DOCK10
							CPXM2	FRMD4A
							SH3D19	SH2D3C
							BNC2	CHN1
							ARL1	FABP4
							OGN	PI5
							LSP1	PHLDA1
							FGFR1	EGFLAM
							ARHGAP20	CRTC3
							MEGF10	NDRG2
							IL16	ITGA1
							LOC100129034	SPEG
							IL20RA	CCDC3
							PLEKHA6	PELI1
							DEPTOR	OLFML2A
							TTC3	CALCRL
							PRRG3	P2RX1
							PLAUR	DLX5
							GJB2	GRM8
							DMGDH	SCN3A
							FAM155A	ARHGAP10
							TLR1	LGR6
							NKD2	RASL12
							LOC100134229	TESC
							PMP22	LOC100506035
							OMD	ACTA2
							MME	KLHL30
							TNFRSF8	SNTA1
							S100A16	PVRL1
							FBLN5	POPDC2
							SLC12A8	SLC8A1
							FLNB	LOC100131347
							SDC1	WNT6
							TSHZ2	MYLK
							AGTRAP	ISYNA1
							ELTD1	COL4A1
							CXCL11	CRIM1
							MMP11	CSRNP3
							F2RL2	GUCY1A2
							ABCA12	ITGA3
							ZCCHC5	TMEM136
							EHD4	SLC2A4
							WNT5A	2007-09-01
							CALU	NCK2
							SAMD11	PLA2G4C
							PCSK5	IL17B
							CHRNA1	ARHGDIB
							CLMP	ECEL1
							MPP3	CLMN
							SERPINB7	SORBS3
							LOC100192378	RAB15
							CCDC109B	COL4A2
							FAM3C	GRIN2C
							PI16	CHST2
							CPZ	SSTR2
							DPYSL3	C1QTNF1
							CST2	KIAA0040
							NEK6	LOC400456
							GRIA3	SORT1
							C13orf15	DACT3
							LOC100507632	PYGM
							B4GALT1	CDK18
							F2RL1	PDE1A
							BOC	RAB6B
							COL12A1	NR2F2
							FAIM2	DMD
							ALPL	SYNE2
							SEMA3C	UBA2
							ARSI	GUCY1A3
							IL11	PRR16
							STMN2	MIR143HG
							PRLR	CNN1
							SRPX	CD93
							FAM114A1	AVPR1A
							FSTL1	BAI3
							DRAM1	MTHFD2
							SLC16A14	NMNAT2
							PPIC	CAV2
							CDH5	LOC100507463
							CDSN	CACNA1A
							HS6ST2	ARHGEF7
							CD55	ANGPT4
							SFT2D2	FAM212B
							KCNK1	GRIN2A
							CNGA3	CD36
							TTC39C	PDE4C
							SULF2	ARHGAP42
							LINC00574	FILIP1
							RALGPS2	CAV1
							BDKRB2	NRGN
							EXPH5	ARHGAP6
							ASPN	HDAC5

## Sheet: Suppl Table 4
Supplementary Table 4: List of genes that are up-regulated in the different clusters identified in the integration of 10 patient tumors analyzed by scRNA-seq.
p_val	"avg_logFC"	"pct.1"	"pct.2"	"p_val_adj"	"cluster"	gene
1.994e-246	1.36089	0.772	0.152	3.65839e-242	"0"	IL7R
6.97684e-243	1.68742	0.941	0.324	1.28004e-238	"0"	LTB
8.43123e-239	0.997914	0.939	0.211	1.54688e-234	"0"	CD3D
4.0523e-235	1.02307	0.86	0.192	7.43476e-231	"0"	TRAC
1.26734e-224	0.464088	0.361	0.01	2.32518e-220	"0"	CD40LG
2.56438e-212	0.827007	0.84	0.18	4.70486e-208	"0"	CD3G
1.07448e-205	0.938699	0.878	0.219	1.97135e-201	"0"	CD2
1.39749e-204	0.772247	0.84	0.198	2.56397e-200	"0"	CD3E
2.34407e-194	0.684108	0.67	0.13	4.30067e-190	"0"	SPOCK2
2.11478e-190	0.455213	0.339	0.014	3.87999e-186	"0"	MAL
6.87256e-179	0.549543	0.529	0.077	1.26091e-174	"0"	RCAN3
1.00366e-159	0.858129	1	0.999	1.84142e-155	"0"	TPT1
6.30829e-155	1.05067	0.63	0.144	1.15738e-150	"0"	TRBC1
1.27543e-153	0.426128	0.352	0.03	2.34003e-149	"0"	ICOS
7.60163e-146	0.868211	0.722	0.21	1.39467e-141	"0"	TRBC2
5.60978e-145	1.02051	0.952	0.467	1.02923e-140	"0"	IL32
8.9224e-140	0.397917	0.381	0.044	1.63699e-135	"0"	TRAT1
1.50218e-139	0.429866	0.46	0.073	2.75605e-135	"0"	BCL11B
3.2139e-139	0.5618	0.665	0.168	5.89655e-135	"0"	LCK
6.77254e-139	0.620691	0.547	0.118	1.24256e-134	"0"	TCF7
1.78523e-136	0.682118	0.803	0.284	3.27536e-132	"0"	ETS1
6.7365e-135	0.734841	1	0.997	1.23595e-130	"0"	EEF1A1
9.35837e-125	0.430494	0.427	0.071	1.71698e-120	"0"	CD6
4.06723e-121	0.4972	0.306	0.031	7.46214e-117	"0"	PASK
1.81856e-115	0.442719	0.512	0.11	3.33651e-111	"0"	CD27
6.33147e-112	0.303767	0.341	0.046	1.16163e-107	"0"	TNFRSF25
7.20129e-110	0.527386	0.7	0.234	1.32122e-105	"0"	ACAP1
1.03133e-109	0.70844	0.654	0.224	1.89218e-105	"0"	GIMAP7
3.96458e-109	0.741097	0.786	0.294	7.27381e-105	"0"	CD69
2.80516e-108	0.437484	0.343	0.05	5.14662e-104	"0"	CCR7
4.17385e-106	0.335871	0.379	0.063	7.65776e-102	"0"	TC2N
1.04983e-105	0.586888	0.737	0.312	1.92613e-101	"0"	AAK1
1.86434e-105	0.317654	0.309	0.038	3.42051e-101	"0"	AQP3
2.30533e-104	0.413888	0.455	0.101	4.22959e-100	"0"	PBXIP1
3.92759e-104	0.726269	0.805	0.443	7.20595e-100	"0"	LDHB
6.92595e-104	0.327647	0.365	0.06	1.2707e-99	"0"	ITK
6.47879e-101	0.614967	0.982	0.855	1.18866e-96	"0"	EEF1D
3.07695e-99	0.382367	0.414	0.086	5.64528e-95	"0"	OXNAD1
5.53128e-98	0.933516	0.427	0.092	1.01482e-93	"0"	KLRB1
1.3289e-97	0.41992	0.495	0.127	2.43814e-93	"0"	LAT
3.13329e-97	0.29788	0.309	0.044	5.74865e-93	"0"	FLT3LG
4.12626e-97	0.65177	0.921	0.722	7.57046e-93	"0"	SARAF
5.38888e-97	0.326057	0.341	0.056	9.88698e-93	"0"	CAMK4
1.06882e-96	0.557614	0.691	0.279	1.96097e-92	"0"	LEPROTL1
5.35588e-95	0.309966	0.269	0.032	9.82644e-91	"0"	LEF1
8.88238e-95	0.273845	0.302	0.042	1.62965e-90	"0"	CD28
2.34029e-94	0.257921	0.271	0.033	4.29373e-90	"0"	CD5
3.43705e-94	0.578252	0.974	0.865	6.30596e-90	"0"	TOMM7
1.1393e-90	0.710006	0.987	0.908	2.09027e-86	"0"	EEF1B2
2.36829e-90	0.524178	1	0.979	4.34511e-86	"0"	UBA52
3.86536e-90	0.432028	0.47	0.124	7.09178e-86	"0"	RORA
4.11266e-90	0.411614	0.506	0.141	7.54549e-86	"0"	SKAP1
1.3688e-88	0.528575	0.543	0.184	2.51134e-84	"0"	NOSIP
8.13339e-88	0.6158	0.974	0.68	1.49223e-83	"0"	CD52
2.10371e-86	0.494196	0.626	0.239	3.85968e-82	"0"	IKZF1
5.51307e-86	0.435395	0.543	0.164	1.01148e-81	"0"	ITM2A
1.55808e-82	0.455444	1	0.987	2.85861e-78	"0"	FAU
4.27191e-78	0.444586	0.567	0.205	7.83768e-74	"0"	TRAF3IP3
6.67658e-78	0.3819	0.554	0.19	1.22495e-73	"0"	EMB
9.41378e-78	0.406317	0.545	0.185	1.72715e-73	"0"	OCIAD2
4.00401e-75	0.558521	0.832	0.531	7.34616e-71	"0"	NOP53
4.89739e-74	0.493778	0.715	0.34	8.98524e-70	"0"	STK4
5.921e-74	0.26441	0.3	0.057	1.08633e-69	"0"	SUSD3
4.63217e-73	0.379702	0.436	0.131	8.49865e-69	"0"	PIK3IP1
8.8796e-73	0.307986	0.506	0.155	1.62914e-68	"0"	CD247
1.37024e-72	0.371255	0.33	0.074	2.51398e-68	"0"	PDE3B
2.1146e-72	0.401897	0.554	0.194	3.87966e-68	"0"	CLEC2D
3.04435e-72	0.410394	0.637	0.265	5.58547e-68	"0"	SEPT6
2.28379e-71	0.392133	0.678	0.268	4.19006e-67	"0"	STK17A
1.74698e-70	0.342879	0.475	0.149	3.20518e-66	"0"	RHOH
4.44648e-70	0.501371	0.983	0.801	8.15795e-66	"0"	BTG1
2.25876e-69	0.442696	0.954	0.903	4.14415e-65	"0"	COX7C
2.51688e-68	0.461272	0.731	0.363	4.61772e-64	"0"	STK17B
5.75808e-68	0.375698	0.473	0.158	1.05643e-63	"0"	EPB41
6.46861e-68	0.336184	0.368	0.095	1.1868e-63	"0"	AC026979.2
1.2348e-67	0.283037	0.346	0.084	2.26549e-63	"0"	RASGRP1
1.4829e-67	0.327743	0.403	0.114	2.72067e-63	"0"	CD96
2.40513e-67	0.250198	0.298	0.062	4.41269e-63	"0"	FAM102A
2.60977e-67	0.408647	0.473	0.157	4.78815e-63	"0"	SOCS1
5.93423e-66	0.514738	0.727	0.414	1.08875e-61	"0"	FXYD5
1.04474e-65	0.46577	0.952	0.829	1.91678e-61	"0"	NPM1
1.61107e-65	0.54851	0.948	0.878	2.95582e-61	"0"	PABPC1
2.15341e-65	0.415441	0.652	0.294	3.95087e-61	"0"	CYTIP
7.5495e-65	0.35298	0.545	0.185	1.38511e-60	"0"	CD7
1.26668e-64	0.419369	0.628	0.282	2.32399e-60	"0"	CDC42SE2
4.62566e-64	0.289021	0.322	0.076	8.48669e-60	"0"	SIT1
1.68636e-63	0.453536	0.961	0.76	3.09397e-59	"0"	PTPRC
6.76449e-63	0.582829	0.893	0.684	1.24108e-58	"0"	ZFP36L2
1.01166e-62	0.426432	0.923	0.757	1.85609e-58	"0"	COMMD6
1.37718e-62	0.436761	0.816	0.512	2.52671e-58	"0"	AES
2.8595e-62	0.501016	0.983	0.958	5.24632e-58	"0"	RACK1
8.19618e-62	0.28609	0.326	0.081	1.50375e-57	"0"	ABLIM1
3.04817e-61	0.414398	0.958	0.854	5.59248e-57	"0"	HINT1
5.42009e-61	0.372916	0.578	0.249	9.94424e-57	"0"	TNFAIP8
8.20077e-61	0.276026	0.293	0.068	1.5046e-56	"0"	DGKA
1.28366e-60	0.455994	0.665	0.324	2.35512e-56	"0"	PPP2R5C
2.43513e-60	0.380193	0.611	0.271	4.46773e-56	"0"	IL2RG
2.81835e-60	0.443486	0.619	0.284	5.17082e-56	"0"	PDCD4
1.28029e-59	0.378518	0.665	0.293	2.34894e-55	"0"	RARRES3
1.44355e-59	0.595781	0.727	0.411	2.64848e-55	"0"	TNFAIP3
5.15771e-59	0.417857	1	0.978	9.46286e-55	"0"	NACA
1.0682e-58	0.399673	0.722	0.364	1.95983e-54	"0"	EVL
1.09656e-58	0.31605	0.309	0.076	2.01186e-54	"0"	GPR171
2.63544e-58	0.328023	0.304	0.077	4.83524e-54	"0"	AP3M2
1.48156e-57	0.355115	0.584	0.243	2.71822e-53	"0"	FYN
3.51693e-57	0.316436	0.418	0.142	6.45251e-53	"0"	TRADD
1.47992e-56	0.399732	0.645	0.316	2.71521e-52	"0"	MZT2A
2.05111e-56	0.431844	1	0.996	3.76317e-52	"0"	MALAT1
2.48792e-56	0.38389	0.971	0.894	4.56458e-52	"0"	TMA7
4.22493e-56	0.292848	1	1	7.75147e-52	"0"	B2M
9.12054e-56	0.402198	0.748	0.399	1.67335e-51	"0"	LIMD2
1.57848e-55	0.409892	0.589	0.274	2.89605e-51	"0"	MT-ND6
2.42711e-55	0.292789	0.372	0.116	4.45302e-51	"0"	TTC39C
4.46731e-55	0.434034	0.842	0.541	8.19617e-51	"0"	ARL4C
1.2554e-53	0.344415	0.464	0.178	2.30329e-49	"0"	SNHG25
2.4413e-53	0.391594	0.733	0.385	4.47906e-49	"0"	RAC2
1.13654e-52	0.400164	0.893	0.676	2.08521e-48	"0"	GMFG
1.40389e-52	0.385246	1	0.995	2.57572e-48	"0"	MT-ATP6
1.59426e-52	0.463875	0.722	0.444	2.92499e-48	"0"	ANKRD12
2.95857e-52	0.424711	0.365	0.118	5.42808e-48	"0"	HIST1H1D
5.1898e-52	0.364899	0.49	0.203	9.52172e-48	"0"	CYLD
8.17059e-52	0.307816	0.453	0.169	1.49906e-47	"0"	ARHGAP15
1.03204e-51	0.336855	0.634	0.285	1.89348e-47	"0"	ISG20
1.61948e-51	0.277769	0.394	0.132	2.97127e-47	"0"	SEPT1
2.02104e-51	0.251288	0.313	0.087	3.708e-47	"0"	CDC14A
3.28171e-50	0.361795	0.634	0.325	6.02096e-46	"0"	FNBP1
6.63367e-50	0.385922	0.694	0.387	1.21708e-45	"0"	DDX24
1.18316e-49	0.295393	0.593	0.26	2.17075e-45	"0"	ICAM3
1.19703e-49	0.542074	0.954	0.885	2.1962e-45	"0"	JUNB
1.72794e-49	0.318648	0.492	0.207	3.17024e-45	"0"	NAP1L4
8.13312e-49	0.361667	0.689	0.362	1.49218e-44	"0"	C12orf57
1.76152e-48	0.37902	0.978	0.932	3.23186e-44	"0"	DDX5
2.15376e-48	0.388495	0.543	0.244	3.9515e-44	"0"	RIPOR2
4.03894e-48	0.375982	0.858	0.605	7.41025e-44	"0"	CD48
1.71703e-47	0.360448	0.967	0.883	3.15024e-43	"0"	UQCRB
2.13095e-47	0.335236	0.521	0.223	3.90966e-43	"0"	SYNE2
2.18664e-47	0.427043	0.775	0.498	4.01183e-43	"0"	FYB1
2.52428e-47	0.337245	0.505	0.217	4.63129e-43	"0"	SLFN5
5.72957e-47	0.41456	0.652	0.362	1.0512e-42	"0"	SNHG8
1.06602e-46	0.360757	0.996	0.946	1.95582e-42	"0"	HLA-C
3.82192e-46	0.332833	0.587	0.289	7.01208e-42	"0"	FAM107B
9.55909e-46	0.360588	0.676	0.37	1.75381e-41	"0"	RGS10
1.52506e-45	0.362903	0.967	0.901	2.79802e-41	"0"	BTF3
2.05467e-45	0.340105	0.691	0.39	3.76971e-41	"0"	ANAPC16
5.8013e-45	0.378904	0.858	0.556	1.06436e-40	"0"	CORO1A
7.68802e-45	0.437848	0.996	0.989	1.41052e-40	"0"	MT-CYB
1.73562e-44	0.371303	0.678	0.392	3.18434e-40	"0"	SF1
1.97646e-44	0.353417	0.641	0.362	3.62622e-40	"0"	GSTK1
2.90618e-44	0.30806	0.656	0.354	5.33198e-40	"0"	HIST1H4C
5.79786e-44	0.383286	0.845	0.587	1.06373e-39	"0"	CXCR4
4.47944e-43	0.270925	0.494	0.21	8.21844e-39	"0"	TBC1D10C
6.12531e-43	0.279533	0.444	0.186	1.12381e-38	"0"	MCUB
6.71044e-42	0.276213	0.339	0.119	1.23116e-37	"0"	BCL2
1.65758e-41	0.289179	0.492	0.22	3.04117e-37	"0"	PSIP1
5.90378e-41	0.323664	0.575	0.295	1.08317e-36	"0"	GYPC
1.39658e-40	0.260405	0.337	0.121	2.56231e-36	"0"	RHOF
2.8124e-40	0.436117	0.751	0.561	5.1599e-36	"0"	EIF3E
3.26395e-40	0.441889	0.481	0.242	5.98836e-36	"0"	CORO1B
2.27732e-39	0.431674	0.418	0.182	4.17821e-35	"0"	SELL
3.34228e-39	0.293944	0.444	0.197	6.13208e-35	"0"	C6orf48
4.47375e-39	0.253027	0.348	0.132	8.208e-35	"0"	TLK1
6.80243e-39	0.255587	0.361	0.137	1.24804e-34	"0"	S1PR4
6.93529e-39	0.425069	0.917	0.825	1.27242e-34	"0"	MTRNR2L12
7.24221e-39	0.348519	0.558	0.287	1.32873e-34	"0"	GIMAP4
1.22974e-38	0.321116	0.451	0.205	2.2562e-34	"0"	ARID5B
1.28282e-38	0.262608	0.389	0.156	2.35359e-34	"0"	SVIP
1.59355e-38	0.263854	0.385	0.156	2.92369e-34	"0"	IL16
6.30245e-38	0.307369	0.948	0.815	1.15631e-33	"0"	ARHGDIB
8.69828e-38	0.29014	0.98	0.905	1.59587e-33	"0"	CALM1
1.16243e-37	0.475428	0.287	0.093	2.13271e-33	"0"	TNFRSF4
1.27011e-37	0.26868	0.398	0.167	2.33027e-33	"0"	CDKN1B
1.69646e-37	0.274951	0.389	0.158	3.1125e-33	"0"	CCND2
1.72065e-37	0.331345	0.764	0.56	3.15688e-33	"0"	APRT
2.31125e-37	0.27829	0.517	0.25	4.24046e-33	"0"	KIAA1551
3.44231e-36	0.32481	0.514	0.267	6.3156e-32	"0"	ATM
4.96671e-36	0.288515	0.49	0.242	9.11243e-32	"0"	EML4
1.31689e-35	0.336114	0.573	0.329	2.4161e-31	"0"	STAT3
1.32814e-35	0.282759	0.501	0.253	2.43674e-31	"0"	PPP1R2
3.15842e-35	0.31256	0.82	0.614	5.79475e-31	"0"	MZT2B
1.11433e-34	0.296234	0.652	0.395	2.04446e-30	"0"	SNRPD2
1.13668e-34	0.324776	0.676	0.438	2.08547e-30	"0"	ANP32B
2.87701e-34	0.266146	0.525	0.278	5.27845e-30	"0"	IK
6.48015e-34	0.300313	0.818	0.66	1.18891e-29	"0"	SON
9.23927e-34	0.257222	0.525	0.267	1.69513e-29	"0"	TSTD1
9.51283e-34	0.284966	0.505	0.269	1.74532e-29	"0"	G3BP2
1.26248e-33	0.283351	0.6	0.341	2.31627e-29	"0"	VAMP2
4.15261e-33	0.290351	0.648	0.402	7.61879e-29	"0"	HLA-F
8.0657e-33	0.305545	0.895	0.799	1.47981e-28	"0"	EEF2
9.25408e-33	0.276708	0.368	0.158	1.69785e-28	"0"	HIST1H1C
4.5032e-32	0.308445	0.558	0.329	8.26202e-28	"0"	ABRACL
4.63076e-32	0.278324	0.486	0.252	8.49605e-28	"0"	NSD3
5.79994e-32	0.27414	0.593	0.345	1.06412e-27	"0"	SYF2
2.27331e-31	0.307224	0.996	0.996	4.17085e-27	"0"	MT-CO1
3.06348e-31	0.353029	0.505	0.268	5.62057e-27	"0"	GPR183
6.54795e-31	0.29535	0.525	0.296	1.20135e-26	"0"	TPR
9.20277e-31	0.271107	1	0.993	1.68843e-26	"0"	MT-ND3
1.93047e-30	0.262936	0.475	0.248	3.54184e-26	"0"	KLF13
2.74024e-30	0.331068	0.466	0.255	5.02753e-26	"0"	GCC2
3.06578e-30	0.308274	0.599	0.374	5.62479e-26	"0"	GTF3A
3.45767e-30	0.254313	0.372	0.171	6.34379e-26	"0"	FBL
3.49794e-30	0.286622	0.851	0.728	6.41767e-26	"0"	SRSF5
3.73817e-30	0.265436	0.936	0.858	6.85842e-26	"0"	OST4
7.86687e-30	0.259528	0.667	0.412	1.44333e-25	"0"	JAK1
1.19596e-29	0.273302	0.635	0.393	2.19422e-25	"0"	CIB1
1.8415e-29	0.311952	0.692	0.481	3.3786e-25	"0"	NSA2
2.64671e-29	0.297764	0.961	0.887	4.85591e-25	"0"	MYL12A
3.82036e-29	0.287399	0.906	0.8	7.00922e-25	"0"	HNRNPA1
4.28658e-29	0.252516	0.368	0.169	7.86458e-25	"0"	NSMCE3
7.41681e-29	0.288326	0.661	0.42	1.36076e-24	"0"	MBNL1
1.46102e-28	0.260101	0.961	0.91	2.68053e-24	"0"	COX4I1
1.60255e-28	0.253771	0.541	0.315	2.9402e-24	"0"	SEPT9
4.2445e-28	0.283006	0.692	0.475	7.78738e-24	"0"	N4BP2L2
5.81617e-28	0.263707	0.645	0.41	1.06709e-23	"0"	CBX3
1.13839e-27	0.300001	0.569	0.353	2.08861e-23	"0"	UXT
3.56181e-27	0.273471	0.449	0.235	6.53485e-23	"0"	BIRC3
1.19834e-26	0.270646	0.652	0.423	2.1986e-22	"0"	GPSM3
2.05298e-26	0.272177	0.418	0.217	3.7666e-22	"0"	ITGA4
2.98914e-26	0.397769	0.866	0.702	5.48417e-22	"0"	S100A4
1.60906e-25	0.254503	0.67	0.454	2.95214e-21	"0"	SRRM1
1.85085e-25	0.303845	0.481	0.271	3.39576e-21	"0"	PIK3R1
3.95581e-25	0.268225	0.705	0.508	7.25772e-21	"0"	SOD1
9.79817e-25	0.252698	0.761	0.578	1.79767e-20	"0"	PNISR
4.59445e-24	0.260955	1	0.993	8.42943e-20	"0"	MT-CO3
3.26115e-23	0.256765	0.74	0.557	5.98323e-19	"0"	RNF213
9.38028e-23	0.263459	0.742	0.595	1.721e-18	"0"	ARL6IP5
1.3171e-22	0.259457	0.552	0.357	2.41648e-18	"0"	EIF4B
2.03475e-22	0.29064	1	0.988	3.73316e-18	"0"	MT-ND1
2.38188e-22	0.256353	0.646	0.468	4.37003e-18	"0"	EIF3H
2.78921e-22	0.278033	0.449	0.258	5.11736e-18	"0"	CREM
6.46141e-21	0.276917	0.492	0.312	1.18548e-16	"0"	PRMT2
1.0196e-20	0.302685	0.6	0.412	1.87065e-16	"0"	BTG2
2.59188e-18	0.286201	0.558	0.35	4.75533e-14	"0"	RGS1
8.53306e-18	0.263801	0.7	0.534	1.56556e-13	"0"	TSC22D3
2.04155e-16	0.473267	0.637	0.554	3.74563e-12	"0"	KLF2
1.74579e-15	0.270384	0.262	0.132	3.203e-11	"0"	LINC01871
3.26209e-11	0.259009	0.495	0.381	5.98495e-07	"0"	CKLF
0	2.05076	0.987	0.189	0	"1"	CCL5
2.69096e-304	0.902176	0.683	0.06	4.9371e-300	"1"	CD8A
1.67183e-291	1.44332	0.912	0.156	3.0673e-287	"1"	GZMA
8.56643e-289	0.889919	0.592	0.04	1.57168e-284	"1"	CD8B
4.23165e-282	1.49227	0.702	0.081	7.7638e-278	"1"	GZMK
2.63871e-279	1.25074	0.666	0.065	4.84124e-275	"1"	GZMH
5.37504e-277	1.36383	0.916	0.172	9.86158e-273	"1"	NKG7
8.88388e-239	1.00489	0.83	0.157	1.62993e-234	"1"	CST7
7.38893e-236	1.08421	0.954	0.224	1.35565e-231	"1"	CD3D
8.71958e-226	0.965091	0.874	0.189	1.59978e-221	"1"	CD3G
9.99038e-188	0.801741	0.849	0.209	1.83294e-183	"1"	CD3E
2.06679e-181	0.859376	0.847	0.208	3.79195e-177	"1"	TRAC
4.26567e-176	0.741341	0.674	0.131	7.82622e-172	"1"	GZMM
1.92549e-174	0.94892	0.857	0.236	3.5327e-170	"1"	CD2
1.95366e-153	0.950622	0.973	0.474	3.58439e-149	"1"	IL32
3.49116e-139	0.89753	0.966	0.591	6.40523e-135	"1"	HCST
4.03741e-135	0.575704	0.408	0.052	7.40744e-131	"1"	TRGC2
2.90091e-133	0.553659	0.529	0.096	5.32231e-129	"1"	LINC01871
3.46313e-132	0.690232	0.666	0.18	6.3538e-128	"1"	APOBEC3G
1.35068e-131	0.744102	0.792	0.283	2.4781e-127	"1"	RARRES3
1.71933e-131	0.52274	0.519	0.098	3.15445e-127	"1"	SAMD3
2.9596e-128	0.787643	0.733	0.219	5.42999e-124	"1"	TRBC2
2.56074e-125	1.31314	0.729	0.208	4.69819e-121	"1"	CCL4
3.49645e-124	0.478955	0.532	0.098	6.41494e-120	"1"	CTSW
3.95003e-120	0.404773	0.374	0.049	7.24713e-116	"1"	LAG3
1.8888e-119	0.56056	0.664	0.178	3.46538e-115	"1"	LCK
3.54167e-113	0.510878	0.361	0.05	6.49789e-109	"1"	KLRG1
5.20336e-110	0.395297	0.462	0.084	9.5466e-106	"1"	PRF1
1.23216e-105	0.596164	0.439	0.079	2.26064e-101	"1"	KLRD1
3.48712e-105	0.499993	0.408	0.065	6.39782e-101	"1"	GZMB
1.31741e-104	0.707072	0.813	0.3	2.41705e-100	"1"	CD69
2.68567e-104	0.624014	0.66	0.213	4.92741e-100	"1"	RUNX3
2.61728e-96	0.725015	0.981	0.685	4.80193e-92	"1"	CD52
7.89678e-93	0.495869	0.489	0.121	1.44882e-88	"1"	CD27
1.28375e-92	0.536836	0.506	0.137	2.3553e-88	"1"	LYAR
1.35993e-89	0.476528	0.519	0.143	2.49506e-85	"1"	C12orf75
1.97089e-88	0.60542	0.733	0.321	3.61598e-84	"1"	PPP2R5C
1.32978e-87	0.55892	0.706	0.272	2.43976e-83	"1"	STK17A
2.41243e-86	0.614726	0.981	0.761	4.42609e-82	"1"	PTPRC
5.99804e-86	0.344183	0.395	0.081	1.10046e-81	"1"	MATK
7.7433e-83	0.615866	0.903	0.555	1.42066e-78	"1"	CORO1A
5.61102e-81	0.543106	0.782	0.363	1.02945e-76	"1"	EVL
1.61359e-79	0.496139	0.265	0.037	2.96045e-75	"1"	IFNG
2.52783e-79	0.332001	0.324	0.057	4.63781e-75	"1"	TIGIT
1.35873e-78	0.492788	0.662	0.249	2.49286e-74	"1"	ACAP1
1.04574e-77	0.377185	0.485	0.136	1.91862e-73	"1"	LAT
3.08308e-74	0.293088	0.54	0.157	5.65653e-70	"1"	CD247
1.67981e-73	0.47234	0.445	0.118	3.08194e-69	"1"	HOPX
2.25542e-73	0.396844	0.588	0.186	4.13801e-69	"1"	CD7
1.68303e-72	0.40899	1	0.997	3.08785e-68	"1"	HLA-B
5.4462e-72	0.411402	0.492	0.15	9.99214e-68	"1"	SKAP1
1.09932e-71	0.627724	0.777	0.41	2.01691e-67	"1"	TNFAIP3
1.96972e-70	0.328731	0.349	0.077	3.61385e-66	"1"	PYHIN1
2.24239e-68	0.308684	0.431	0.116	4.1141e-64	"1"	CD96
8.95277e-68	0.516953	0.788	0.428	1.64257e-63	"1"	PSMB9
1.25931e-66	0.621254	0.517	0.17	2.31045e-62	"1"	TRBC1
2.08854e-66	0.346437	0.439	0.126	3.83185e-62	"1"	IKZF3
2.49174e-65	0.263151	0.298	0.059	4.5716e-61	"1"	CXCR3
3.35402e-65	0.326042	1	1	6.15361e-61	"1"	B2M
6.17868e-63	0.493595	0.962	0.888	1.1336e-58	"1"	MYL12A
5.30712e-61	0.299517	0.303	0.066	9.73697e-57	"1"	SH2D1A
3.03645e-60	0.343969	1	0.993	5.57097e-56	"1"	HLA-A
1.69219e-59	0.421264	0.542	0.203	3.10466e-55	"1"	CLEC2D
2.3218e-58	0.422709	0.981	0.894	4.25981e-54	"1"	TMA7
8.5959e-58	0.449452	0.853	0.579	1.57709e-53	"1"	CD99
2.02906e-56	0.44822	0.985	0.895	3.72271e-52	"1"	SH3BGRL3
7.62735e-55	0.347766	1	0.998	1.39939e-50	"1"	TMSB4X
1.44487e-54	0.265364	0.319	0.08	2.6509e-50	"1"	GPR171
1.91624e-54	0.369636	0.532	0.21	3.51573e-50	"1"	TBC1D10C
5.71712e-53	0.440873	0.735	0.391	1.04892e-48	"1"	RAC2
4.91695e-52	0.261103	0.336	0.091	9.02112e-48	"1"	CD6
4.17974e-51	0.481576	0.912	0.685	7.66857e-47	"1"	ZFP36L2
5.22232e-51	0.261291	0.347	0.097	9.58138e-47	"1"	BCL11B
2.12615e-48	0.440053	0.882	0.658	3.90084e-44	"1"	SRSF7
5.05297e-48	0.404451	0.599	0.293	9.27068e-44	"1"	CDC42SE2
5.84364e-48	0.502397	0.618	0.294	1.07213e-43	"1"	ISG20
2.76585e-47	0.379844	0.985	0.906	5.07451e-43	"1"	CALM1
4.04684e-46	0.445294	0.866	0.589	7.42474e-42	"1"	CXCR4
9.02221e-46	0.35416	0.611	0.299	1.65531e-41	"1"	LEPROTL1
5.25253e-45	0.25976	0.3	0.085	9.63681e-41	"1"	SIT1
8.21784e-45	0.352467	0.559	0.253	1.50773e-40	"1"	FYN
1.05873e-44	0.552849	0.618	0.325	1.94245e-40	"1"	DUSP2
1.25986e-44	0.395279	0.866	0.672	2.31146e-40	"1"	PSME1
2.20419e-44	0.4472	0.782	0.523	4.04402e-40	"1"	AES
6.3946e-44	0.279417	0.393	0.137	1.17322e-39	"1"	GBP5
7.77434e-44	0.281485	0.433	0.162	1.42636e-39	"1"	RHOH
1.03887e-43	0.314295	0.517	0.22	1.90601e-39	"1"	TRAF3IP3
5.82127e-43	0.429284	0.666	0.383	1.06803e-38	"1"	CLEC2B
5.93326e-43	0.277776	0.372	0.129	1.08857e-38	"1"	RASAL3
7.1669e-43	0.296877	0.447	0.178	1.31491e-38	"1"	ITGAL
1.62833e-42	0.274636	0.38	0.135	2.98749e-38	"1"	PTPN22
1.89338e-42	0.30452	0.447	0.181	3.47378e-38	"1"	AKNA
8.58576e-42	0.353356	0.55	0.248	1.57523e-37	"1"	GIMAP7
9.93846e-42	0.265697	0.34	0.11	1.82341e-37	"1"	TENT5C
1.02515e-41	0.388114	0.935	0.695	1.88084e-37	"1"	S100A4
1.1168e-40	0.335874	0.468	0.201	2.04899e-36	"1"	BTN3A2
1.21733e-40	0.344887	0.515	0.23	2.23343e-36	"1"	SYNE2
1.42509e-40	0.296756	0.479	0.203	2.61462e-36	"1"	SLC38A1
2.48635e-40	0.360396	0.58	0.296	4.5617e-36	"1"	PDCD4
3.69394e-40	0.291843	0.401	0.151	6.77727e-36	"1"	PTPN7
5.91095e-40	0.313158	0.412	0.162	1.08448e-35	"1"	TUBA4A
2.36438e-39	0.412148	0.771	0.556	4.33792e-35	"1"	RNF213
3.76419e-39	0.335055	0.498	0.224	6.90615e-35	"1"	SLFN5
4.05268e-39	0.267081	0.813	0.533	7.43546e-35	"1"	MT2A
8.86599e-38	0.382981	0.954	0.809	1.62664e-33	"1"	BTG1
9.6584e-38	0.314339	0.968	0.859	1.77203e-33	"1"	EEF1D
6.74609e-37	0.25024	0.347	0.126	1.23771e-32	"1"	CHST12
7.23353e-37	0.354783	0.838	0.613	1.32714e-32	"1"	CD48
1.01451e-36	0.336714	0.618	0.338	1.86133e-32	"1"	AAK1
1.71252e-36	0.299222	0.416	0.172	3.14197e-32	"1"	SOCS1
3.03066e-36	0.338194	0.618	0.321	5.56036e-32	"1"	ETS1
5.18123e-36	0.384605	0.628	0.364	9.50601e-32	"1"	CKLF
1.38352e-34	0.587121	0.282	0.087	2.53834e-30	"1"	GNLY
1.17488e-33	0.298123	0.529	0.261	2.15556e-29	"1"	IKZF1
2.74628e-33	0.325683	0.912	0.798	5.0386e-29	"1"	SUB1
1.49225e-32	0.354878	0.96	0.928	2.73783e-28	"1"	PFN1
3.05449e-32	0.288287	0.933	0.86	5.60408e-28	"1"	OST4
3.74184e-32	0.256378	0.305	0.11	6.86515e-28	"1"	AC026979.2
5.99474e-32	0.319492	0.695	0.413	1.09986e-27	"1"	LIMD2
1.41613e-31	0.355568	0.798	0.553	2.59818e-27	"1"	ARL4C
8.75885e-31	0.328313	0.517	0.27	1.60699e-26	"1"	PIK3R1
1.50679e-30	0.269057	0.426	0.189	2.76451e-26	"1"	ITM2A
4.79325e-30	0.313204	0.905	0.804	8.79417e-26	"1"	MYL12B
1.67457e-29	0.328636	0.605	0.363	3.07234e-25	"1"	STK4
1.76555e-29	0.262543	0.941	0.872	3.23925e-25	"1"	TOMM7
1.88905e-29	0.261686	0.433	0.206	3.46585e-25	"1"	PIP4K2A
4.25192e-29	0.331863	0.863	0.662	7.801e-25	"1"	ANXA1
3.7499e-28	0.306952	0.473	0.248	6.87993e-24	"1"	PAXX
4.16702e-28	0.297234	0.529	0.288	7.64524e-24	"1"	SEPT6
6.61496e-28	0.305412	0.489	0.259	1.21365e-23	"1"	KIAA1551
7.23836e-28	0.283927	0.378	0.17	1.32802e-23	"1"	ITM2C
7.42785e-28	0.320399	0.504	0.276	1.36279e-23	"1"	MBP
9.22012e-28	0.317578	0.639	0.408	1.69161e-23	"1"	HLA-F
2.42074e-27	0.251676	0.462	0.235	4.44134e-23	"1"	ARPC5L
1.34647e-26	0.356353	0.632	0.394	2.47038e-22	"1"	IRF1
4.69835e-26	0.269416	0.83	0.694	8.62006e-22	"1"	GUK1
4.98244e-26	0.318182	0.622	0.404	9.14128e-22	"1"	DDX24
6.8401e-26	0.326441	0.605	0.348	1.25495e-21	"1"	RGS1
7.45373e-26	0.268171	0.525	0.29	1.36754e-21	"1"	IL2RG
8.24793e-25	0.250696	0.868	0.684	1.51325e-20	"1"	GMFG
1.19222e-24	0.261302	0.527	0.307	2.18737e-20	"1"	ABHD17A
1.25529e-24	0.25841	0.345	0.16	2.30309e-20	"1"	SYNE1
2.60757e-24	0.269087	0.866	0.729	4.78411e-20	"1"	SRSF5
8.74234e-24	0.291057	0.561	0.352	1.60396e-19	"1"	VAMP2
9.19913e-24	0.261395	0.872	0.767	1.68776e-19	"1"	COMMD6
1.19478e-23	0.276763	0.916	0.829	2.19206e-19	"1"	CLIC1
1.50528e-23	0.272812	0.803	0.642	2.76174e-19	"1"	SEPT7
1.98729e-23	0.290543	0.605	0.403	3.64608e-19	"1"	CIB1
2.81194e-23	0.274203	0.445	0.244	5.15907e-19	"1"	SSBP4
3.20319e-23	0.269481	0.527	0.308	5.8769e-19	"1"	ADGRE5
3.78902e-23	0.262813	0.525	0.308	6.95172e-19	"1"	GYPC
4.4751e-23	0.28329	0.968	0.925	8.21047e-19	"1"	JUND
2.47048e-22	0.261489	0.897	0.825	4.53259e-18	"1"	ARHGDIB
3.89604e-22	0.258291	0.326	0.154	7.14807e-18	"1"	APOBEC3C
9.11981e-22	0.255689	0.929	0.883	1.67321e-17	"1"	ATP5MG
1.20819e-21	0.275254	0.756	0.602	2.21666e-17	"1"	TRIR
1.82909e-21	0.251254	0.62	0.405	3.35583e-17	"1"	SNRPD2
9.28876e-21	0.292681	0.683	0.529	1.70421e-16	"1"	DRAP1
2.4084e-19	0.266	0.494	0.302	4.41869e-15	"1"	GIMAP4
8.80291e-19	0.287036	0.553	0.38	1.61507e-14	"1"	GSTK1
9.70401e-18	0.267481	0.567	0.402	1.78039e-13	"1"	PSMB8
5.5928e-15	0.275493	0.683	0.54	1.02611e-10	"1"	TSC22D3
3.58427e-12	0.364384	0.643	0.487	6.57605e-08	"1"	ISG15
0	2.30051	0.971	0.175	0	"2"	C1QB
0	2.19499	0.966	0.138	0	"2"	C1QC
0	2.03857	0.818	0.08	0	"2"	SLC40A1
0	1.83358	0.83	0.098	0	"2"	FUCA1
0	1.68219	0.892	0.124	0	"2"	LGMN
0	1.54488	0.966	0.155	0	"2"	MS4A6A
0	1.44038	0.735	0.045	0	"2"	FOLR2
0	1.36635	0.811	0.089	0	"2"	PLA2G7
0	1.0619	0.651	0.043	0	"2"	ADAMDEC1
0	0.99061	0.833	0.066	0	"2"	SLCO2B1
9.59384e-305	2.2333	0.975	0.213	1.76018e-300	"2"	C1QA
1.086e-298	1.66424	0.902	0.133	1.99248e-294	"2"	GPNMB
3.7436e-297	1.22665	0.749	0.078	6.86837e-293	"2"	IL18
6.44124e-284	1.07667	0.875	0.135	1.18177e-279	"2"	TMEM176A
7.10955e-284	1.43886	0.914	0.175	1.30439e-279	"2"	TMEM176B
8.30626e-284	1.05488	0.912	0.153	1.52395e-279	"2"	CREG1
2.64015e-280	1.13778	0.796	0.101	4.84388e-276	"2"	MS4A4A
4.55022e-270	0.853071	0.656	0.057	8.34829e-266	"2"	ENPP2
1.67318e-268	2.35818	0.774	0.116	3.06978e-264	"2"	SELENOP
1.81901e-266	1.44826	0.904	0.175	3.33734e-262	"2"	LIPA
1.61934e-264	0.912914	0.791	0.11	2.97101e-260	"2"	NPL
1.015e-257	1.15048	0.845	0.14	1.86222e-253	"2"	DAB2
8.76161e-257	0.665679	0.661	0.063	1.60749e-252	"2"	FPR3
1.13166e-256	0.67095	0.587	0.044	2.07626e-252	"2"	OTOA
8.14349e-256	0.642698	0.634	0.056	1.49409e-251	"2"	KCNMA1
4.94576e-255	1.07148	0.929	0.197	9.07399e-251	"2"	HLA-DMB
5.75382e-249	1.37576	0.899	0.185	1.05565e-244	"2"	IGSF6
6.07739e-249	0.839113	0.762	0.106	1.11502e-244	"2"	RASSF4
9.60087e-246	0.813343	0.767	0.106	1.76147e-241	"2"	GM2A
1.29068e-242	0.481123	0.469	0.023	2.368e-238	"2"	TMEM37
7.85873e-242	0.712564	0.597	0.053	1.44184e-237	"2"	C2
2.11101e-241	0.61147	0.639	0.065	3.87307e-237	"2"	SLAMF8
7.75045e-240	0.904641	0.771	0.118	1.42198e-235	"2"	RNASE6
2.14032e-237	1.58236	0.966	0.259	3.92685e-233	"2"	CD14
1.65845e-231	1.14167	0.479	0.028	3.04276e-227	"2"	PLA2G2D
2.71865e-231	1.6003	0.855	0.166	4.98791e-227	"2"	CCL3
4.73565e-231	0.781708	0.771	0.114	8.68849e-227	"2"	CSF1R
1.50055e-230	0.853729	0.848	0.151	2.75305e-226	"2"	MPEG1
6.73094e-230	1.29735	0.98	0.287	1.23493e-225	"2"	CD68
1.14853e-229	0.476483	0.455	0.023	2.1072e-225	"2"	GPR34
4.16898e-229	2.35917	0.924	0.282	7.64883e-225	"2"	APOE
4.40445e-225	0.898516	0.872	0.186	8.08085e-221	"2"	CD4
8.6614e-225	0.60639	0.631	0.073	1.58911e-220	"2"	SGPL1
1.01494e-222	0.66918	0.747	0.113	1.86212e-218	"2"	HNMT
1.31718e-222	0.594533	0.472	0.029	2.41663e-218	"2"	GATM
1.28907e-221	0.675333	0.482	0.032	2.36506e-217	"2"	CD163L1
2.55228e-221	1.59828	0.995	0.481	4.68267e-217	"2"	CTSZ
2.05639e-220	0.749521	0.794	0.144	3.77285e-216	"2"	MFSD1
3.26511e-218	0.964262	0.853	0.157	5.99049e-214	"2"	CPVL
5.09312e-216	1.39466	0.99	0.465	9.34434e-212	"2"	NPC2
8.22652e-215	0.697191	0.779	0.133	1.50932e-210	"2"	SLC15A3
7.58828e-214	0.54722	0.531	0.046	1.39222e-209	"2"	SLC1A3
1.80478e-212	1.19017	0.921	0.231	3.31123e-208	"2"	CTSL
2.12703e-212	1.06744	0.862	0.211	3.90246e-208	"2"	PLD3
3.68336e-212	0.822942	0.717	0.107	6.75785e-208	"2"	LILRB4
3.9169e-212	0.655945	0.658	0.089	7.18633e-208	"2"	ADAP2
7.45494e-211	1.87177	0.882	0.228	1.36776e-206	"2"	APOC1
9.55751e-208	1.2263	0.998	0.475	1.75352e-203	"2"	GRN
4.30299e-205	0.839858	0.84	0.184	7.89469e-201	"2"	CD84
1.02333e-203	1.10467	0.951	0.298	1.87751e-199	"2"	HLA-DMA
1.30874e-203	0.900345	0.796	0.15	2.40114e-199	"2"	MAFB
2.64431e-202	1.00452	0.656	0.09	4.85151e-198	"2"	PLTP
3.08802e-202	0.78131	0.912	0.226	5.6656e-198	"2"	RNF130
3.7779e-200	1.51957	0.995	0.591	6.93131e-196	"2"	PSAP
7.93066e-200	0.628994	0.7	0.112	1.45504e-195	"2"	CYFIP1
6.36499e-199	0.585537	0.644	0.088	1.16778e-194	"2"	ACP2
1.89299e-197	0.976536	0.862	0.21	3.47307e-193	"2"	BLVRB
4.73279e-197	0.775504	0.676	0.103	8.68326e-193	"2"	ABCA1
1.41124e-196	1.44401	0.99	0.466	2.5892e-192	"2"	CTSB
1.22092e-191	1.21726	0.776	0.153	2.24003e-187	"2"	MS4A7
1.65222e-190	0.604678	0.533	0.057	3.03132e-186	"2"	SDC3
3.91964e-188	0.90338	0.806	0.168	7.19136e-184	"2"	ACP5
4.39762e-188	0.541083	0.627	0.087	8.06831e-184	"2"	RAB20
6.81782e-188	1.21073	0.968	0.417	1.25087e-183	"2"	FCGRT
2.14924e-187	0.729932	0.747	0.146	3.94322e-183	"2"	TSPAN4
7.57895e-186	0.543618	0.654	0.099	1.39051e-181	"2"	C3AR1
2.36822e-185	1.12027	0.617	0.088	4.34497e-181	"2"	CCL3L1
1.24593e-184	0.694284	0.693	0.118	2.28591e-180	"2"	C1orf54
6.8119e-184	0.671031	0.717	0.13	1.24978e-179	"2"	TTYH3
7.62961e-184	0.565823	0.526	0.058	1.3998e-179	"2"	SMPDL3A
2.14782e-183	1.46277	0.998	0.761	3.94061e-179	"2"	CD74
2.46238e-183	1.36746	0.975	0.517	4.51773e-179	"2"	CTSC
2.12398e-182	1.07742	0.961	0.425	3.89686e-178	"2"	ASAH1
6.58741e-182	0.559831	0.651	0.102	1.20859e-177	"2"	MPP1
1.41086e-181	0.5964	0.654	0.105	2.58851e-177	"2"	BMP2K
5.26864e-180	1.1141	0.602	0.088	9.66637e-176	"2"	CD163
5.67037e-180	0.73835	0.875	0.235	1.04034e-175	"2"	TPP1
9.11792e-180	0.836329	0.629	0.095	1.67287e-175	"2"	IL4I1
4.88305e-179	1.5148	0.98	0.548	8.95894e-175	"2"	CTSD
6.24355e-178	0.498234	0.585	0.078	1.1455e-173	"2"	TFEC
1.26373e-175	1.44865	0.912	0.343	2.31856e-171	"2"	HLA-DQA1
6.27173e-175	0.534367	0.516	0.057	1.15068e-170	"2"	NR1H3
7.27962e-175	0.589966	0.658	0.11	1.33559e-170	"2"	CD86
1.79803e-174	0.722188	0.688	0.133	3.29884e-170	"2"	DNASE2
5.16055e-174	0.538081	0.627	0.097	9.46807e-170	"2"	RBM47
4.42377e-172	0.828688	0.889	0.221	8.11628e-168	"2"	CYBB
8.07464e-172	0.785285	0.828	0.181	1.48145e-167	"2"	FGL2
3.11238e-171	0.907199	0.887	0.253	5.71028e-167	"2"	CTSH
6.67316e-171	0.592759	0.742	0.153	1.22432e-166	"2"	LAIR1
2.32996e-170	0.433414	0.45	0.042	4.27478e-166	"2"	CMKLR1
1.1328e-169	1.39571	0.998	0.601	2.07834e-165	"2"	HLA-DRA
1.78747e-169	0.637816	0.781	0.181	3.27947e-165	"2"	HEXA
3.71571e-169	0.589606	0.713	0.129	6.81721e-165	"2"	CXCL16
7.91441e-169	0.689546	0.563	0.082	1.45206e-164	"2"	IL18BP
7.78833e-168	0.582272	0.654	0.118	1.42893e-163	"2"	AP1B1
1.74123e-167	0.472831	0.563	0.078	3.19463e-163	"2"	FCHO2
8.20549e-167	0.48361	0.43	0.037	1.50546e-162	"2"	RARRES1
2.04108e-166	1.07434	0.978	0.406	3.74476e-162	"2"	AIF1
2.09843e-165	0.876229	0.835	0.255	3.84998e-161	"2"	AKR1A1
4.00811e-165	0.478467	0.619	0.1	7.35369e-161	"2"	ABHD12
5.9747e-165	1.43562	0.715	0.145	1.09618e-160	"2"	HMOX1
1.00077e-164	1.20818	0.87	0.286	1.83612e-160	"2"	CAPG
2.2469e-163	1.33216	0.985	0.616	4.1224e-159	"2"	HLA-DPA1
3.77871e-162	0.421475	0.472	0.052	6.93279e-158	"2"	DAPK1
3.16193e-161	1.33979	1	0.98	5.8012e-157	"2"	FTL
3.39003e-161	0.438839	0.477	0.053	6.21968e-157	"2"	RGL1
3.83086e-160	0.611006	0.789	0.185	7.02847e-156	"2"	LY96
3.18327e-159	0.728661	0.84	0.238	5.84034e-155	"2"	CTSA
4.28266e-159	0.441237	0.489	0.059	7.85739e-155	"2"	HLA-DOA
7.99513e-159	0.72306	0.808	0.22	1.46687e-154	"2"	NAGK
3.86213e-157	1.36922	0.919	0.444	7.08584e-153	"2"	ATOX1
6.2525e-157	1.28671	0.973	0.665	1.14715e-152	"2"	PRDX1
2.29665e-156	0.671854	0.865	0.25	4.21366e-152	"2"	PPT1
1.62063e-155	0.633268	0.744	0.174	2.97337e-151	"2"	ADA2
2.58803e-154	1.17406	0.983	0.611	4.74826e-150	"2"	HLA-DPB1
7.42857e-154	0.773152	0.914	0.304	1.36292e-149	"2"	TIMP2
6.83066e-153	1.55927	0.56	0.092	1.25322e-148	"2"	MMP9
2.03646e-152	0.65147	0.688	0.141	3.73629e-148	"2"	KCTD12
7.12437e-151	0.581218	0.735	0.171	1.30711e-146	"2"	SCPEP1
1.90418e-150	0.609988	0.482	0.062	3.49359e-146	"2"	PLAU
8.91983e-150	1.34043	0.486	0.062	1.63652e-145	"2"	CCL18
2.38239e-149	0.437958	0.334	0.022	4.37097e-145	"2"	LINC00996
1.30788e-148	0.478503	0.359	0.027	2.39956e-144	"2"	IGF1
4.33435e-148	0.958354	0.993	0.44	7.95224e-144	"2"	FCER1G
1.25187e-146	1.40908	0.975	0.637	2.29681e-142	"2"	HLA-DRB1
3.52305e-146	0.609699	0.686	0.159	6.46373e-142	"2"	AKR1B1
7.47995e-144	0.828465	0.811	0.226	1.37235e-139	"2"	SGK1
7.53027e-144	0.632399	0.744	0.176	1.38158e-139	"2"	TNFSF13B
3.05698e-143	0.522638	0.651	0.133	5.60864e-139	"2"	LY86
1.06568e-141	0.402415	0.396	0.038	1.9552e-137	"2"	RAB42
3.48033e-141	0.456322	0.58	0.1	6.38536e-137	"2"	PTAFR
9.06599e-141	0.92408	0.924	0.336	1.66334e-136	"2"	GLUL
1.09517e-140	0.478731	0.491	0.069	2.00931e-136	"2"	ALDH1A1
2.40008e-140	1.08799	0.99	0.534	4.40344e-136	"2"	CST3
2.44625e-140	0.417822	0.516	0.077	4.48814e-136	"2"	CSF2RA
8.00369e-140	1.3378	0.548	0.096	1.46844e-135	"2"	CCL4L2
6.89945e-138	0.510786	0.617	0.121	1.26584e-133	"2"	DMXL2
9.05715e-137	0.65669	0.484	0.067	1.66172e-132	"2"	MRC1
1.34092e-136	0.699556	0.848	0.295	2.46019e-132	"2"	LAMP1
1.91286e-136	0.43517	0.484	0.069	3.50952e-132	"2"	TCN2
1.35788e-134	0.461726	0.55	0.093	2.49131e-130	"2"	CPM
1.464e-133	0.361198	0.364	0.035	2.68601e-129	"2"	MERTK
2.40027e-133	0.558383	0.644	0.142	4.40377e-129	"2"	MGST2
5.95093e-133	0.500106	0.398	0.046	1.09182e-128	"2"	CUL9
5.98976e-133	0.29937	0.3	0.02	1.09894e-128	"2"	EBI3
3.74796e-132	0.475073	0.572	0.107	6.87639e-128	"2"	PLXNC1
4.4645e-132	0.516357	0.769	0.21	8.19102e-128	"2"	SYNGR2
5.06506e-132	0.319499	0.258	0.012	9.29287e-128	"2"	GAL3ST4
6.17008e-132	0.306213	0.324	0.025	1.13202e-127	"2"	PDE6G
1.3431e-131	0.553338	0.735	0.174	2.46419e-127	"2"	CLEC7A
4.94177e-131	0.588517	0.479	0.07	9.06666e-127	"2"	SERPINF1
7.48601e-131	0.556679	0.636	0.135	1.37346e-126	"2"	TGFBI
1.52821e-130	0.532612	0.87	0.231	2.80381e-126	"2"	SPI1
2.7442e-130	0.43472	0.619	0.126	5.03479e-126	"2"	TBXAS1
1.22557e-129	0.562325	0.656	0.149	2.24856e-125	"2"	RAB32
8.04665e-129	0.898105	0.496	0.084	1.47632e-124	"2"	STAB1
8.27707e-129	0.451925	0.55	0.101	1.51859e-124	"2"	NAIP
5.7065e-128	0.445335	0.528	0.094	1.04697e-123	"2"	GNPDA1
4.45632e-127	0.549282	0.744	0.201	8.17601e-123	"2"	GRINA
2.18222e-125	0.522845	0.781	0.232	4.00371e-121	"2"	ATP6AP1
3.25078e-125	0.552074	0.71	0.176	5.9642e-121	"2"	CFD
1.88178e-124	0.546562	0.732	0.176	3.4525e-120	"2"	A2M
3.39603e-124	0.40699	0.452	0.066	6.2307e-120	"2"	CEBPA
9.24208e-124	0.865644	1	0.778	1.69564e-119	"2"	SAT1
9.62478e-124	0.740584	0.993	0.604	1.76586e-119	"2"	CTSS
2.47063e-123	0.842432	0.995	0.469	4.53287e-119	"2"	TYROBP
8.2432e-123	0.345876	0.332	0.031	1.51238e-118	"2"	SLC7A8
7.28694e-122	0.82392	0.995	0.771	1.33693e-117	"2"	CD63
1.08306e-121	0.506788	0.634	0.149	1.9871e-117	"2"	BLVRA
1.35888e-121	0.535583	0.757	0.221	2.49314e-117	"2"	LAMP2
3.17269e-121	0.505117	0.658	0.161	5.82094e-117	"2"	GNS
6.07593e-120	0.426191	0.565	0.112	1.11475e-115	"2"	SIRPA
1.67184e-119	0.749833	0.486	0.086	3.06733e-115	"2"	CLEC4E
3.17059e-119	1.1571	0.904	0.494	5.81708e-115	"2"	HLA-DQB1
3.40225e-119	0.548647	0.563	0.115	6.24211e-115	"2"	ICAM1
9.99409e-118	0.66196	0.676	0.181	1.83362e-113	"2"	MAF
5.56333e-117	0.37002	0.44	0.067	1.0207e-112	"2"	SEMA4A
1.03714e-116	0.367362	0.459	0.073	1.90284e-112	"2"	SIGLEC10
2.08205e-116	0.550728	0.735	0.204	3.81994e-112	"2"	NINJ1
1.23891e-115	0.441517	0.393	0.053	2.27303e-111	"2"	LINC01857
2.0106e-115	0.321674	0.398	0.054	3.68886e-111	"2"	RENBP
2.07264e-115	0.435387	0.511	0.097	3.80268e-111	"2"	MCOLN1
1.57839e-114	0.771349	0.978	0.738	2.89588e-110	"2"	CD81
9.9178e-114	0.530169	0.725	0.207	1.81962e-109	"2"	IFNGR2
1.46288e-113	0.411113	0.553	0.111	2.68395e-109	"2"	NRP2
2.01542e-113	0.422277	0.459	0.076	3.69769e-109	"2"	AXL
5.16094e-113	0.50724	0.715	0.2	9.46878e-109	"2"	ATP6V1B2
2.38442e-112	0.359302	0.425	0.065	4.3747e-108	"2"	SLC38A6
3.95294e-112	0.502576	0.457	0.075	7.25246e-108	"2"	MSR1
4.11307e-112	0.837318	0.907	0.462	7.54625e-108	"2"	LGALS3
2.56338e-111	0.42234	0.474	0.086	4.70304e-107	"2"	IDH1
2.67899e-111	0.428598	0.563	0.124	4.91514e-107	"2"	UNC93B1
1.12436e-110	0.306274	0.356	0.044	2.06286e-106	"2"	SIGLEC7
1.80151e-110	0.422322	0.602	0.134	3.30524e-106	"2"	PILRA
7.94179e-110	0.385743	0.486	0.087	1.45708e-105	"2"	MMP14
3.62222e-109	0.399584	0.609	0.139	6.64569e-105	"2"	SLC7A7
7.94769e-109	0.292131	0.319	0.034	1.45816e-104	"2"	LACC1
8.44785e-109	0.402228	0.472	0.086	1.54993e-104	"2"	GLA
9.60613e-109	0.285497	0.314	0.033	1.76244e-104	"2"	SLC29A3
4.66712e-108	0.680125	0.634	0.163	8.56276e-104	"2"	FCGR2A
5.9541e-108	0.517607	0.629	0.164	1.0924e-103	"2"	AOAH
6.59041e-108	0.48701	0.624	0.167	1.20914e-103	"2"	DRAM2
7.82175e-108	0.334627	0.4	0.06	1.43506e-103	"2"	GPR137B
8.08849e-108	1.32053	0.531	0.115	1.48399e-103	"2"	SPP1
1.13017e-107	0.483858	0.678	0.194	2.07352e-103	"2"	NCOA4
2.41453e-107	0.35618	0.342	0.041	4.42994e-103	"2"	QPRT
2.74135e-107	0.484081	0.617	0.146	5.02956e-103	"2"	TNFAIP2
7.76517e-107	0.372131	0.482	0.089	1.42468e-102	"2"	TLR4
9.06735e-107	0.399537	0.44	0.075	1.66359e-102	"2"	SPRED1
1.38789e-105	0.712186	0.943	0.473	2.54637e-101	"2"	MARCKS
2.55532e-105	0.492233	0.378	0.055	4.68825e-101	"2"	CHCHD6
9.57174e-104	0.716853	0.936	0.411	1.75613e-99	"2"	LYZ
1.68548e-103	0.618545	0.939	0.511	3.09235e-99	"2"	SDCBP
4.2643e-103	0.637987	0.587	0.154	7.82372e-99	"2"	TFRC
2.02567e-102	0.613531	0.963	0.723	3.71649e-98	"2"	GPX4
5.07002e-102	0.61955	0.538	0.132	9.30196e-98	"2"	CYB561A3
7.5333e-102	0.706285	0.998	0.92	1.38213e-97	"2"	ITM2B
1.47412e-101	0.36655	0.408	0.067	2.70457e-97	"2"	KLHDC8B
2.08408e-101	0.600547	0.973	0.623	3.82366e-97	"2"	BRI3
3.11859e-100	0.25913	0.305	0.034	5.72167e-96	"2"	HSD17B14
5.13448e-100	0.392901	0.545	0.127	9.42023e-96	"2"	NAAA
1.79324e-99	0.431067	0.501	0.107	3.29006e-95	"2"	FRMD4B
4.20225e-99	0.329946	0.391	0.062	7.70986e-95	"2"	EPB41L3
4.84386e-99	0.467166	0.516	0.115	8.88702e-95	"2"	ATP1B1
5.63362e-99	0.294234	0.351	0.048	1.0336e-94	"2"	MITF
9.41513e-99	0.284565	0.322	0.04	1.72739e-94	"2"	ETV5
3.18121e-98	0.504435	0.479	0.103	5.83657e-94	"2"	ANKH
4.11489e-98	0.517578	0.464	0.091	7.54958e-94	"2"	CYP27A1
4.8734e-98	0.353005	0.334	0.044	8.94122e-94	"2"	SIGLEC1
6.07809e-98	0.48201	0.663	0.197	1.11515e-93	"2"	SCARB2
6.55361e-98	0.519729	0.786	0.299	1.20239e-93	"2"	M6PR
8.86519e-98	0.308215	0.366	0.054	1.6265e-93	"2"	ABCC5
1.21866e-97	0.432144	0.654	0.187	2.23587e-93	"2"	HEXB
3.27358e-96	0.315733	0.428	0.078	6.00605e-92	"2"	NAGA
2.79776e-95	0.25389	0.307	0.037	5.13305e-91	"2"	CLIC2
3.40659e-94	0.38145	0.457	0.093	6.25008e-90	"2"	TNS3
1.3516e-93	0.456578	0.749	0.251	2.47978e-89	"2"	LGALS9
1.65839e-93	1.27687	0.327	0.046	3.04265e-89	"2"	DNASE1L3
3.96918e-93	0.391929	0.545	0.131	7.28225e-89	"2"	MARCH1
6.3012e-93	0.479242	0.609	0.171	1.15608e-88	"2"	PHACTR1
6.90367e-93	0.365866	0.499	0.112	1.26662e-88	"2"	GAA
7.47068e-93	0.307191	0.366	0.058	1.37064e-88	"2"	FMNL2
3.78386e-92	0.572513	0.951	0.662	6.94224e-88	"2"	CSTB
5.98727e-92	0.695709	0.83	0.4	1.09848e-87	"2"	ATP6AP2
3.84151e-91	0.361833	0.499	0.114	7.04801e-87	"2"	FUOM
1.02847e-90	0.363806	0.504	0.116	1.88694e-86	"2"	GNB4
1.13772e-90	0.552785	0.796	0.279	2.08738e-86	"2"	CEBPD
5.09014e-90	0.37917	0.423	0.081	9.33889e-86	"2"	LHFPL2
8.41553e-90	0.411208	0.378	0.065	1.544e-85	"2"	PDK4
3.37851e-89	0.289139	0.359	0.057	6.19855e-85	"2"	SDSL
3.6251e-89	0.375176	0.521	0.127	6.65097e-85	"2"	ATP6V1A
6.22847e-89	0.985561	0.317	0.044	1.14274e-84	"2"	MMP12
6.63652e-89	0.552298	0.921	0.544	1.2176e-84	"2"	VAMP8
7.14049e-89	0.322046	0.428	0.085	1.31007e-84	"2"	CREBL2
9.58223e-89	0.256734	0.258	0.026	1.75805e-84	"2"	SUCNR1
7.66932e-88	0.477596	0.779	0.32	1.40709e-83	"2"	DPP7
8.5939e-88	0.273203	0.314	0.044	1.57672e-83	"2"	SCARB1
9.07517e-88	0.691002	0.801	0.329	1.66502e-83	"2"	RGS1
1.46789e-87	0.254363	0.351	0.055	2.69314e-83	"2"	RRAGD
2.36436e-87	0.525739	0.926	0.543	4.3379e-83	"2"	ATP6V0B
5.31719e-87	0.255192	0.322	0.046	9.75545e-83	"2"	TM6SF1
5.47018e-87	0.359066	0.418	0.085	1.00361e-82	"2"	TMEM138
6.40482e-87	0.339227	0.432	0.088	1.17509e-82	"2"	CLEC4A
1.60254e-86	0.401687	0.447	0.097	2.94018e-82	"2"	MGLL
1.20063e-85	0.270126	0.83	0.276	2.20279e-81	"2"	LST1
2.77627e-85	0.312327	0.491	0.112	5.09362e-81	"2"	PLBD1
6.19857e-85	0.413091	0.541	0.146	1.13725e-80	"2"	ITPR2
2.59263e-84	0.534428	0.258	0.029	4.7567e-80	"2"	CETP
2.82157e-84	0.598526	0.828	0.388	5.17673e-80	"2"	SQSTM1
2.93732e-84	0.440097	0.624	0.197	5.3891e-80	"2"	DNPH1
8.37368e-84	0.265271	0.344	0.057	1.53632e-79	"2"	PLBD2
1.44532e-83	0.357424	0.55	0.149	2.65172e-79	"2"	PCBD1
1.5513e-83	0.312085	0.568	0.152	2.84617e-79	"2"	PRCP
3.92587e-83	0.302194	0.44	0.092	7.20279e-79	"2"	LRRC25
7.3819e-83	0.37139	0.563	0.159	1.35436e-78	"2"	GUSB
1.46391e-82	0.57323	1	0.991	2.68583e-78	"2"	FTH1
1.71262e-82	1.19281	0.614	0.228	3.14214e-78	"2"	HLA-DRB5
1.48362e-81	0.347645	0.698	0.216	2.72199e-77	"2"	CD59
2.46138e-81	0.323735	0.545	0.142	4.51589e-77	"2"	HCK
2.5294e-81	0.388771	0.607	0.185	4.64069e-77	"2"	OAZ2
4.41936e-81	0.376523	0.457	0.105	8.10821e-77	"2"	FAM213A
7.1572e-81	0.370866	0.371	0.069	1.31313e-76	"2"	NCEH1
7.641e-81	0.306507	0.403	0.082	1.40189e-76	"2"	GSAP
9.40236e-81	0.321808	0.437	0.098	1.72505e-76	"2"	MKNK1
2.85204e-80	0.336797	0.538	0.145	5.23263e-76	"2"	SPINT2
3.97053e-80	0.446313	0.681	0.241	7.28473e-76	"2"	SMS
1.6596e-79	0.390638	0.455	0.105	3.04487e-75	"2"	CCR1
2.90595e-79	0.444988	0.526	0.142	5.33155e-75	"2"	DST
4.36366e-79	0.275314	0.319	0.051	8.00601e-75	"2"	PLA2G15
1.18236e-77	0.3949	0.654	0.224	2.16927e-73	"2"	RNF13
1.52092e-77	0.307881	0.305	0.048	2.79042e-73	"2"	SLC48A1
2.3571e-77	0.288365	0.275	0.037	4.32457e-73	"2"	CLEC10A
8.73982e-77	0.384924	0.506	0.131	1.6035e-72	"2"	PMP22
2.2178e-76	0.309063	0.405	0.089	4.06899e-72	"2"	GLMP
6.8975e-76	0.404362	0.263	0.034	1.26548e-71	"2"	SDS
7.21098e-76	0.583892	0.865	0.471	1.323e-71	"2"	RNASET2
1.12184e-75	0.319078	0.386	0.081	2.05824e-71	"2"	MYO5A
2.95247e-75	0.307857	0.425	0.098	5.4169e-71	"2"	AIG1
3.05854e-75	0.523775	0.732	0.273	5.61151e-71	"2"	PLEK
6.52375e-75	0.365819	0.568	0.174	1.19691e-70	"2"	VOPP1
1.84497e-74	0.304474	0.425	0.098	3.38496e-70	"2"	ATP6V0A1
1.88377e-74	0.345786	0.366	0.073	3.45615e-70	"2"	EPHX1
2.77433e-74	0.342013	0.408	0.092	5.09007e-70	"2"	ADAM9
3.24219e-74	0.550249	0.921	0.557	5.94845e-70	"2"	TYMP
9.51994e-74	0.382662	0.442	0.112	1.74662e-69	"2"	TOR3A
1.59155e-73	0.271932	0.364	0.072	2.92002e-69	"2"	CD300LF
1.63957e-73	0.345609	0.595	0.191	3.00811e-69	"2"	PLEKHB2
1.04491e-72	0.415013	0.388	0.083	1.91709e-68	"2"	SCD
1.6825e-72	0.283111	0.41	0.094	3.08688e-68	"2"	CHPT1
2.59591e-72	0.331195	0.491	0.133	4.76272e-68	"2"	NCF4
2.91823e-72	0.419061	0.445	0.112	5.35408e-68	"2"	EPB41L2
2.31737e-71	0.362805	0.555	0.166	4.25168e-67	"2"	CD300A
3.44831e-71	0.256105	0.334	0.063	6.32661e-67	"2"	CRYL1
1.18207e-70	0.315746	0.472	0.125	2.16874e-66	"2"	IRF8
3.69077e-70	0.470821	0.889	0.551	6.77146e-66	"2"	ATP6V1F
5.64881e-70	0.358418	0.484	0.136	1.03639e-65	"2"	PRNP
8.10708e-70	0.282756	0.688	0.235	1.48741e-65	"2"	GSN
1.20368e-69	0.473251	0.995	0.915	2.2084e-65	"2"	CYBA
2.09524e-69	0.363482	0.354	0.073	3.84413e-65	"2"	CR1
3.27726e-69	0.476228	0.639	0.228	6.01279e-65	"2"	PLIN2
7.24471e-69	0.40652	0.722	0.308	1.32919e-64	"2"	RPN2
7.69522e-69	0.261017	0.278	0.042	1.41184e-64	"2"	CXCL12
1.55413e-68	0.347941	0.491	0.137	2.85136e-64	"2"	PLXDC2
2.21344e-68	0.429983	0.302	0.053	4.061e-64	"2"	VSIG4
4.15721e-68	0.330221	0.275	0.044	7.62724e-64	"2"	VCAM1
1.30878e-67	0.473791	0.791	0.362	2.40122e-63	"2"	UCP2
4.30438e-67	0.467236	0.74	0.316	7.89725e-63	"2"	LAP3
1.06975e-66	0.353927	0.378	0.089	1.96267e-62	"2"	WWP1
3.52964e-66	0.279587	0.442	0.117	6.47584e-62	"2"	FUCA2
6.82072e-66	0.264831	0.327	0.065	1.2514e-61	"2"	FRMD4A
1.39889e-65	0.299527	0.44	0.118	2.56654e-61	"2"	NEU1
2.65246e-64	0.370067	0.585	0.206	4.86647e-60	"2"	MGAT4A
2.99864e-64	0.339911	0.538	0.177	5.5016e-60	"2"	SNX5
1.05505e-63	0.332154	0.612	0.217	1.93571e-59	"2"	VEGFB
1.10903e-63	0.273352	0.408	0.102	2.03474e-59	"2"	IL13RA1
1.2974e-63	0.292996	0.445	0.12	2.38034e-59	"2"	HAVCR2
1.52194e-63	0.320391	0.418	0.109	2.79231e-59	"2"	FNIP2
2.0925e-63	0.387594	0.676	0.266	3.83911e-59	"2"	MGAT1
4.97318e-63	0.496159	0.597	0.219	9.1243e-59	"2"	CD83
5.39511e-63	0.321542	0.283	0.05	9.8984e-59	"2"	TREM2
6.20014e-63	0.268731	0.413	0.107	1.13754e-58	"2"	ATP6V1C1
9.82729e-63	0.26272	0.403	0.102	1.80301e-58	"2"	ACER3
1.78795e-62	0.342367	0.432	0.119	3.28034e-58	"2"	AHR
2.4745e-62	0.484193	0.767	0.372	4.53996e-58	"2"	RGS10
6.07488e-62	0.415761	0.558	0.196	1.11456e-57	"2"	RAP2B
7.3631e-62	0.284488	0.405	0.104	1.35091e-57	"2"	CD302
8.60612e-62	0.420377	0.71	0.301	1.57897e-57	"2"	ZFAND5
1.45916e-61	0.282953	0.268	0.046	2.67712e-57	"2"	ANTXR1
1.64777e-61	0.406156	0.693	0.297	3.02317e-57	"2"	NFE2L2
2.26905e-61	0.319377	0.641	0.209	4.16302e-57	"2"	SERPINA1
2.62646e-61	0.339959	0.464	0.139	4.81877e-57	"2"	UGCG
3.12416e-61	0.259069	0.359	0.083	5.73189e-57	"2"	SHTN1
3.81203e-61	0.275597	0.396	0.102	6.99392e-57	"2"	TRIM14
4.81334e-61	0.309069	0.373	0.09	8.83104e-57	"2"	DRAM1
1.03503e-60	0.33641	0.614	0.231	1.89897e-56	"2"	RAB10
3.74753e-60	0.33187	0.58	0.208	6.8756e-56	"2"	MYO9B
5.75861e-60	0.392224	0.786	0.346	1.05653e-55	"2"	SAMHD1
1.04183e-59	0.385847	0.636	0.222	1.91145e-55	"2"	PLAUR
3.19533e-59	0.4369	0.796	0.399	5.86248e-55	"2"	TALDO1
4.01817e-59	0.251809	0.334	0.074	7.37214e-55	"2"	GAS7
1.66757e-58	0.3205	0.342	0.079	3.05948e-54	"2"	NR4A3
1.73662e-58	0.302805	0.55	0.192	3.18617e-54	"2"	CISD2
1.8699e-58	0.399145	0.747	0.356	3.4307e-54	"2"	CHCHD10
2.26199e-58	0.403623	0.934	0.669	4.15008e-54	"2"	RAC1
5.84578e-58	0.347167	0.597	0.231	1.07253e-53	"2"	NCKAP1L
6.7504e-58	0.384998	0.499	0.161	1.2385e-53	"2"	LRP1
1.19742e-57	0.442179	0.953	0.737	2.19691e-53	"2"	GSTP1
2.56801e-57	0.316111	0.543	0.185	4.71153e-53	"2"	ARHGAP18
3.23064e-57	0.367026	0.946	0.717	5.92725e-53	"2"	ATP6V0E1
6.32425e-57	0.337712	0.644	0.255	1.16031e-52	"2"	SERPINB6
6.63103e-57	0.260661	0.4	0.11	1.2166e-52	"2"	SMIM30
9.51583e-57	0.435885	0.936	0.611	1.74587e-52	"2"	ITGB2
1.26842e-56	0.333321	0.661	0.268	2.32717e-52	"2"	SNX2
2.74695e-56	0.291478	0.464	0.142	5.03984e-52	"2"	THEMIS2
4.818e-56	0.411703	0.479	0.15	8.83958e-52	"2"	CSTA
5.91587e-56	0.470533	0.693	0.286	1.08539e-51	"2"	SOD2
8.56777e-56	0.444253	0.329	0.076	1.57193e-51	"2"	LGALS2
1.28419e-55	0.26598	0.378	0.099	2.3561e-51	"2"	SLC31A2
1.42182e-55	0.294846	0.391	0.106	2.60861e-51	"2"	SLAMF7
1.45491e-55	0.401427	0.882	0.54	2.66933e-51	"2"	ANXA5
1.85411e-55	0.325443	0.391	0.105	3.40173e-51	"2"	ATF5
2.82515e-55	0.294528	0.575	0.214	5.18331e-51	"2"	SCAMP2
3.47211e-55	0.274496	0.337	0.08	6.37028e-51	"2"	P2RY13
5.76162e-55	0.321056	0.464	0.146	1.05708e-50	"2"	RAB31
1.37683e-54	0.387004	0.725	0.351	2.52606e-50	"2"	CANX
1.83878e-54	0.251024	0.322	0.075	3.37362e-50	"2"	SASH1
3.91433e-54	0.283273	0.661	0.262	7.18162e-50	"2"	ATP6V0D1
5.33984e-54	0.386062	0.627	0.27	9.797e-50	"2"	QKI
7.32474e-54	0.394732	0.256	0.05	1.34387e-49	"2"	RCAN1
1.7818e-53	0.264454	0.42	0.126	3.26908e-49	"2"	TMEM70
3.41559e-53	0.316357	0.447	0.146	6.26657e-49	"2"	AP2A2
5.99822e-53	0.434311	0.98	0.734	1.10049e-48	"2"	LAPTM5
9.69218e-53	0.251845	0.386	0.108	1.77822e-48	"2"	OTULINL
1.0934e-52	0.2821	0.474	0.156	2.00606e-48	"2"	RHOQ
2.28744e-52	0.32335	0.56	0.206	4.19676e-48	"2"	CCDC88A
2.31473e-52	0.327248	0.639	0.268	4.24684e-48	"2"	FERMT3
2.67051e-52	0.314382	0.597	0.237	4.89958e-48	"2"	MLEC
1.20678e-51	0.410634	0.528	0.194	2.21408e-47	"2"	ATF3
1.99454e-51	0.281339	0.396	0.116	3.65938e-47	"2"	PDE4DIP
6.42324e-51	0.277463	0.511	0.183	1.17847e-46	"2"	PEPD
1.23843e-50	0.522863	0.504	0.184	2.27215e-46	"2"	IER3
1.2682e-50	0.288875	0.501	0.178	2.32676e-46	"2"	GNPTAB
2.55526e-50	0.372598	0.545	0.223	4.68813e-46	"2"	SDHD
3.02521e-50	0.360248	0.646	0.279	5.55035e-46	"2"	IFNGR1
4.32248e-50	0.287059	0.533	0.195	7.93045e-46	"2"	PDXK
6.23271e-50	0.283163	0.393	0.114	1.14352e-45	"2"	IFI30
1.06931e-49	0.451344	0.811	0.469	1.96187e-45	"2"	LITAF
1.20703e-49	0.346323	0.862	0.539	2.21454e-45	"2"	CLTA
1.76018e-49	0.356422	0.587	0.252	3.2294e-45	"2"	CLTC
1.98349e-49	0.259877	0.413	0.129	3.63912e-45	"2"	HSD17B4
3.56579e-49	0.347943	0.351	0.096	6.54215e-45	"2"	CALHM6
5.82087e-49	0.266246	0.486	0.172	1.06795e-44	"2"	NANS
7.28274e-49	0.38844	0.386	0.112	1.33616e-44	"2"	NUPR1
1.1491e-48	0.352415	0.73	0.354	2.10825e-44	"2"	BCAP31
4.17025e-48	0.268006	0.447	0.15	7.65117e-44	"2"	UBE2D1
6.32816e-48	0.304957	0.6	0.252	1.16103e-43	"2"	G3BP1
1.22437e-47	0.254866	0.349	0.099	2.24634e-43	"2"	KLHL6
3.83674e-47	0.290364	0.455	0.157	7.03927e-43	"2"	ZFYVE16
9.52442e-47	0.342278	0.872	0.589	1.74745e-42	"2"	CAPZB
2.00481e-46	0.279233	0.658	0.29	3.67822e-42	"2"	COMT
5.85699e-46	0.272422	0.302	0.077	1.07458e-41	"2"	FCGR1A
6.71984e-46	0.264522	0.418	0.135	1.23289e-41	"2"	SPATS2L
7.0664e-46	0.354227	0.624	0.27	1.29647e-41	"2"	RGS2
7.34951e-46	0.420254	0.72	0.375	1.34841e-41	"2"	HERPUD1
1.06275e-45	0.464743	0.71	0.371	1.94982e-41	"2"	NR4A2
1.50674e-45	0.263435	0.995	0.811	2.76442e-41	"2"	S100A11
1.77428e-45	0.290254	0.499	0.191	3.25528e-41	"2"	CAT
1.8334e-45	0.412857	0.919	0.675	3.36374e-41	"2"	LGALS1
2.1098e-45	0.409925	0.29	0.073	3.87085e-41	"2"	COLEC12
3.03436e-45	0.289541	0.479	0.172	5.56714e-41	"2"	SLC16A3
2.63257e-44	0.257775	0.545	0.213	4.82997e-40	"2"	CASP1
2.8837e-44	0.301381	0.968	0.8	5.29073e-40	"2"	TMBIM6
1.21245e-43	1.19923	0.359	0.117	2.22449e-39	"2"	RNASE1
1.92402e-43	0.252895	0.366	0.112	3.53e-39	"2"	SLC43A2
2.79931e-43	0.289252	0.43	0.154	5.13589e-39	"2"	CNDP2
4.27432e-43	0.317282	0.826	0.485	7.8421e-39	"2"	AP2S1
6.5026e-43	0.26898	0.55	0.224	1.19303e-38	"2"	SKAP2
7.46102e-43	0.270832	0.607	0.268	1.36887e-38	"2"	RHOG
9.89904e-43	0.35063	0.624	0.306	1.81618e-38	"2"	SELENOS
1.38024e-42	0.440889	0.619	0.301	2.53232e-38	"2"	STAT1
1.93539e-42	0.546449	0.459	0.173	3.55085e-38	"2"	FCGR3A
3.17319e-42	0.262979	0.45	0.167	5.82186e-38	"2"	PITHD1
3.423e-42	0.267091	0.614	0.253	6.28019e-38	"2"	C1orf162
1.99805e-41	0.265134	0.501	0.202	3.66583e-37	"2"	GALNT1
4.21572e-41	0.265507	0.344	0.108	7.73459e-37	"2"	MCUR1
4.8581e-41	0.317315	0.663	0.336	8.91316e-37	"2"	TIMM8B
6.45678e-41	0.503217	0.6	0.282	1.18462e-36	"2"	LMNA
1.62464e-40	0.281541	0.663	0.32	2.98074e-36	"2"	RAB5C
2.03634e-40	0.363906	0.597	0.267	3.73607e-36	"2"	GPR183
2.87206e-40	0.252099	0.528	0.223	5.26937e-36	"2"	PRDX3
8.88929e-40	0.44518	0.531	0.244	1.63092e-35	"2"	CHMP1B
1.93138e-39	0.470778	0.545	0.24	3.54351e-35	"2"	CCL4
2.82113e-39	0.33814	0.486	0.19	5.17592e-35	"2"	KLF4
6.02947e-39	0.297033	0.617	0.292	1.10623e-34	"2"	H2AFJ
3.5954e-38	0.341516	0.614	0.303	6.59649e-34	"2"	MDH1
3.80802e-38	0.304376	0.585	0.276	6.98657e-34	"2"	PABPC4
3.89646e-38	0.288574	0.811	0.452	7.14883e-34	"2"	EFHD2
8.51342e-38	0.321369	1	0.998	1.56196e-33	"2"	TMSB4X
1.18131e-37	0.300352	0.504	0.214	2.16735e-33	"2"	MAT2A
1.32103e-37	0.307338	0.705	0.351	2.42369e-33	"2"	ZEB2
2.34369e-37	0.433951	0.29	0.083	4.29997e-33	"2"	CXCL2
1.6689e-36	0.269488	0.435	0.164	3.06192e-32	"2"	LGALS3BP
4.18526e-36	0.393975	0.607	0.318	7.6787e-32	"2"	GADD45B
6.96079e-36	0.311572	0.509	0.227	1.2771e-31	"2"	IQGAP2
8.19959e-36	0.269227	0.629	0.311	1.50438e-31	"2"	LAMTOR2
1.0541e-35	0.360174	0.627	0.327	1.93396e-31	"2"	ATP1B3
1.09382e-35	0.37118	0.865	0.672	2.00682e-31	"2"	DBI
1.72693e-35	0.279746	0.641	0.327	3.16841e-31	"2"	LRPAP1
2.36103e-35	0.296102	0.668	0.326	4.33178e-31	"2"	APLP2
2.76755e-35	0.282307	0.654	0.331	5.07762e-31	"2"	LIMS1
4.42128e-35	0.276822	0.489	0.206	8.11173e-31	"2"	MAP3K8
7.62571e-35	0.420753	0.848	0.64	1.39909e-30	"2"	TXN
9.57905e-35	0.252347	0.545	0.241	1.75747e-30	"2"	SAMSN1
1.6103e-34	0.251046	0.484	0.206	2.95442e-30	"2"	BEX4
6.0254e-34	0.257562	0.676	0.348	1.10548e-29	"2"	SSR3
8.60348e-34	0.271464	0.799	0.491	1.57848e-29	"2"	RTN4
2.02705e-33	0.270649	0.663	0.349	3.71904e-29	"2"	MYDGF
4.1772e-32	0.268555	0.705	0.378	7.66392e-28	"2"	H2AFY
4.9767e-32	0.400458	0.654	0.385	9.13075e-28	"2"	FABP5
8.31434e-32	0.250489	0.84	0.513	1.52543e-27	"2"	CD53
1.82553e-31	0.277805	0.87	0.611	3.3493e-27	"2"	ANXA2
3.11046e-31	0.452841	0.533	0.281	5.70676e-27	"2"	ZNF331
5.63275e-31	0.251023	0.683	0.374	1.03344e-26	"2"	RNH1
6.86729e-31	0.264319	0.361	0.134	1.25994e-26	"2"	CD36
2.14706e-30	0.277299	0.826	0.503	3.93922e-26	"2"	FYB1
2.6063e-30	0.250001	0.56	0.277	4.78179e-26	"2"	ARL6IP1
2.62615e-30	0.349728	0.354	0.132	4.8182e-26	"2"	HES1
2.62242e-29	0.263549	0.649	0.365	4.81136e-25	"2"	SNX6
6.04753e-29	0.315784	0.565	0.292	1.10954e-24	"2"	YWHAH
8.91356e-29	0.305864	0.359	0.134	1.63537e-24	"2"	AC020656.1
2.07208e-27	0.328878	0.835	0.659	3.80164e-23	"2"	NFKBIA
4.31519e-27	0.309865	0.902	0.733	7.91708e-23	"2"	CALR
8.72133e-27	0.27536	0.285	0.102	1.6001e-22	"2"	TNFRSF4
3.07874e-26	0.295165	0.359	0.144	5.64856e-22	"2"	CXCL8
3.27553e-23	0.269647	0.258	0.091	6.00962e-19	"2"	C15orf48
1.40423e-18	0.275234	0.563	0.361	2.57633e-14	"2"	AKAP9
6.37198e-18	0.28783	0.531	0.327	1.16907e-13	"2"	ID2
1.71618e-17	0.336143	0.752	0.586	3.14867e-13	"2"	ZFP36L1
0	3.46458	0.885	0.01	0	"3"	COL1A1
0	3.09088	0.891	0.006	0	"3"	COL1A2
0	2.76392	0.832	0.007	0	"3"	COL3A1
0	2.54502	0.744	0.03	0	"3"	TAGLN
0	2.34949	0.862	0.082	0	"3"	FN1
0	2.32882	0.591	0.026	0	"3"	ACTA2
0	2.24381	0.815	0.071	0	"3"	CALD1
0	2.08543	0.712	0.024	0	"3"	TPM2
0	2.06061	0.424	0.001	0	"3"	DCN
0	2.03941	0.832	0.049	0	"3"	COL6A2
0	1.90298	0.759	0.025	0	"3"	BGN
0	1.7643	0.697	0.03	0	"3"	THY1
0	1.73926	0.797	0.049	0	"3"	COL6A1
0	1.67956	0.682	0.028	0	"3"	MYL9
0	1.65151	0.674	0.006	0	"3"	COL6A3
0	1.28703	0.626	0.006	0	"3"	PDGFRB
0	1.20226	0.615	0.015	0	"3"	PLAC9
0	1.14198	0.6	0.027	0	"3"	AEBP1
0	1.1361	0.626	0.031	0	"3"	PCOLCE
0	1.12627	0.568	0.007	0	"3"	NOTCH3
0	1.05635	0.574	0.008	0	"3"	COL5A1
0	1.02555	0.591	0.017	0	"3"	COL5A2
0	0.928571	0.518	0.002	0	"3"	SOD3
0	0.824755	0.497	0.001	0	"3"	PRRX1
0	0.759905	0.459	0.001	0	"3"	MXRA8
9.78937e-305	2.26515	0.718	0.053	1.79605e-300	"3"	MGP
2.62062e-303	1.12915	0.606	0.032	4.80804e-299	"3"	LHFPL6
1.0314e-302	1.13418	0.597	0.028	1.89231e-298	"3"	NR2F2
3.72302e-302	1.04215	0.5	0.014	6.83062e-298	"3"	CCDC102B
9.65453e-296	1.46116	0.385	0.001	1.77132e-291	"3"	LUM
2.67247e-288	0.724437	0.474	0.012	4.90318e-284	"3"	EMILIN1
6.64695e-286	1.76541	0.741	0.067	1.21952e-281	"3"	COL4A2
1.82895e-285	0.968724	0.624	0.041	3.35558e-281	"3"	MFGE8
2.81091e-280	1.78315	0.735	0.066	5.15717e-276	"3"	COL4A1
1.63768e-278	0.889521	0.465	0.013	3.00465e-274	"3"	PLXDC1
5.95982e-274	1.04646	0.376	0.002	1.09345e-269	"3"	HIGD1B
6.82751e-274	1.63489	0.718	0.072	1.25264e-269	"3"	COL18A1
8.82821e-273	2.3523	0.888	0.131	1.61971e-268	"3"	IGFBP7
5.00365e-272	0.702524	0.371	0.002	9.18019e-268	"3"	CARMN
1.21662e-269	0.688198	0.374	0.003	2.23213e-265	"3"	COL14A1
2.59321e-268	0.806787	0.447	0.012	4.75776e-264	"3"	CD248
8.62527e-266	1.14307	0.618	0.043	1.58248e-261	"3"	FSTL1
9.40514e-261	1.94515	0.879	0.141	1.72556e-256	"3"	SPARC
1.81599e-259	0.627691	0.429	0.01	3.3318e-255	"3"	COL12A1
1.59379e-254	0.722346	0.453	0.015	2.92414e-250	"3"	MYLK
1.04622e-251	0.719419	0.512	0.026	1.9195e-247	"3"	TGFB1I1
5.67295e-251	1.7267	0.756	0.104	1.04082e-246	"3"	TPM1
7.60365e-251	0.45229	0.35	0.003	1.39504e-246	"3"	SEMA5A
4.50911e-249	0.729279	0.374	0.005	8.27287e-245	"3"	CRYAB
7.95047e-245	0.583431	0.391	0.008	1.45867e-240	"3"	SEPT4
5.52604e-244	0.492749	0.324	0.001	1.01386e-239	"3"	EDNRA
1.7835e-243	1.09503	0.424	0.013	3.27218e-239	"3"	C1R
1.7905e-241	1.87125	0.424	0.013	3.28503e-237	"3"	POSTN
2.30768e-241	0.608531	0.347	0.003	4.2339e-237	"3"	ID4
3.61042e-241	1.1091	0.515	0.029	6.62403e-237	"3"	FBN1
9.70643e-237	1.77323	0.391	0.01	1.78084e-232	"3"	CCDC80
1.18666e-236	0.462197	0.362	0.006	2.17716e-232	"3"	FAT1
2.22442e-232	0.701062	0.309	0.001	4.08115e-228	"3"	THBS2
1.53172e-231	1.07329	0.515	0.031	2.81024e-227	"3"	NNMT
1.46423e-228	1.26745	0.576	0.05	2.68642e-224	"3"	UACA
5.69529e-228	0.401246	0.297	0	1.04492e-223	"3"	KCNE4
1.16096e-227	0.50476	0.347	0.006	2.13002e-223	"3"	COL5A3
2.10759e-226	0.998414	0.479	0.027	3.86679e-222	"3"	PPP1R14A
5.37912e-226	0.669696	0.353	0.006	9.86908e-222	"3"	SULF1
1.32047e-225	0.770344	0.294	0	2.42267e-221	"3"	ASPN
1.44506e-225	1.1334	0.585	0.052	2.65126e-221	"3"	CPE
2.18486e-225	1.57762	0.609	0.059	4.00856e-221	"3"	C11orf96
3.19556e-225	0.50607	0.362	0.008	5.86289e-221	"3"	CDH11
4.55422e-225	0.467974	0.3	0.001	8.35563e-221	"3"	SMOC2
3.9809e-224	0.621705	0.426	0.017	7.30375e-220	"3"	GGT5
6.23437e-222	1.33051	0.459	0.023	1.14382e-217	"3"	CTGF
1.5832e-218	0.334804	0.318	0.003	2.9047e-214	"3"	PRKG1
2.1368e-217	0.781008	0.521	0.038	3.92038e-213	"3"	SDC2
2.4507e-216	0.441183	0.315	0.003	4.4963e-212	"3"	CSPG4
9.20127e-216	1.36408	0.6	0.054	1.68816e-211	"3"	SPARCL1
1.16989e-212	0.382449	0.321	0.005	2.1464e-208	"3"	VASN
2.68285e-211	0.511747	0.297	0.002	4.92222e-207	"3"	KCNJ8
5.14522e-211	0.494737	0.438	0.022	9.43994e-207	"3"	SGCE
6.01405e-209	0.595513	0.288	0.002	1.1034e-204	"3"	ABCC9
6.18992e-209	1.2772	0.629	0.066	1.13566e-204	"3"	TIMP3
3.79378e-204	0.326293	0.279	0.001	6.96044e-200	"3"	SNHG18
2.22265e-203	0.743651	0.318	0.006	4.07789e-199	"3"	MMP11
3.66681e-202	0.793884	0.291	0.003	6.72751e-198	"3"	TNC
3.50058e-199	0.808035	0.526	0.046	6.42251e-195	"3"	CAVIN3
7.7135e-196	1.36002	0.559	0.057	1.4152e-191	"3"	IGFBP2
4.9755e-195	0.805957	0.482	0.038	9.12854e-191	"3"	PDLIM3
1.04241e-194	0.475689	0.432	0.026	1.91251e-190	"3"	EHD2
2.96371e-193	0.571629	0.382	0.017	5.43752e-189	"3"	PDGFA
4.91329e-193	0.295157	0.256	0.001	9.01441e-189	"3"	ECM2
2.07997e-192	0.465159	0.388	0.018	3.81613e-188	"3"	ARHGEF17
1.10476e-189	0.3932	0.291	0.005	2.0269e-185	"3"	GUCY1A2
1.25344e-189	0.996591	0.597	0.07	2.29969e-185	"3"	PRSS23
2.10896e-187	0.623817	0.397	0.021	3.8693e-183	"3"	CFH
4.75633e-186	0.336031	0.274	0.003	8.72644e-182	"3"	CDH6
5.26317e-185	0.49389	0.406	0.024	9.65634e-181	"3"	KANK2
7.77627e-185	0.587658	0.365	0.016	1.42671e-180	"3"	SLIT3
5.64534e-184	0.590464	0.374	0.018	1.03575e-179	"3"	TPPP3
1.71104e-183	0.33205	0.259	0.002	3.13925e-179	"3"	ENPEP
2.50653e-181	0.862272	0.582	0.068	4.59874e-177	"3"	SERPINH1
2.65702e-181	0.341999	0.282	0.005	4.87484e-177	"3"	KDELR3
3.804e-181	0.349373	0.262	0.003	6.97921e-177	"3"	FOXS1
4.19265e-181	0.726168	0.429	0.029	7.69225e-177	"3"	TINAGL1
1.09824e-180	0.448467	0.368	0.017	2.01494e-176	"3"	FKBP10
3.0942e-180	0.505405	0.391	0.022	5.67692e-176	"3"	RCN3
3.16111e-180	1.36445	0.482	0.045	5.79969e-176	"3"	NDUFA4L2
8.36309e-180	0.751256	0.526	0.054	1.53438e-175	"3"	PPIC
8.97113e-180	0.348305	0.306	0.008	1.64593e-175	"3"	DDR2
4.37481e-178	0.767182	0.574	0.065	8.02646e-174	"3"	CAVIN1
8.81723e-178	0.775862	0.318	0.01	1.6177e-173	"3"	C1S
1.01324e-177	0.621077	0.506	0.051	1.85899e-173	"3"	EPS8
1.30158e-177	0.802695	0.494	0.045	2.38802e-173	"3"	AKAP12
3.68018e-177	0.362077	0.329	0.012	6.75202e-173	"3"	TMEM98
1.53637e-176	0.842672	0.424	0.029	2.81879e-172	"3"	CYR61
2.06687e-174	0.491356	0.324	0.012	3.79209e-170	"3"	GJC1
2.35626e-174	0.470663	0.371	0.02	4.32303e-170	"3"	EFEMP2
4.52872e-172	0.315868	0.256	0.003	8.30885e-168	"3"	FOXC2
8.01016e-172	0.516311	0.379	0.022	1.46962e-167	"3"	GUCY1A1
1.03919e-170	0.288336	0.262	0.004	1.9066e-166	"3"	KIRREL1
4.9169e-170	0.73946	0.453	0.04	9.02105e-166	"3"	OLFML2B
5.78326e-170	0.664664	0.479	0.047	1.06105e-165	"3"	CLEC11A
8.70603e-170	1.04314	0.512	0.054	1.5973e-165	"3"	MCAM
2.25857e-169	0.410299	0.262	0.004	4.1438e-165	"3"	FRZB
3.24942e-169	0.314715	0.276	0.006	5.96171e-165	"3"	ADAMTS2
2.56416e-166	0.551883	0.491	0.047	4.70447e-162	"3"	LAMC1
3.74597e-165	0.619996	0.524	0.055	6.87272e-161	"3"	LAMA4
8.81307e-160	0.305419	0.274	0.007	1.61693e-155	"3"	SSPN
2.18609e-159	0.411251	0.318	0.014	4.01083e-155	"3"	DCBLD2
2.75821e-157	0.555498	0.382	0.027	5.0605e-153	"3"	TBX2
3.17541e-157	0.766905	0.562	0.078	5.82593e-153	"3"	CNN3
5.5647e-157	0.567797	0.503	0.054	1.02096e-152	"3"	TFPI
6.39702e-157	0.508812	0.447	0.042	1.17366e-152	"3"	DLC1
2.42473e-156	0.658364	0.456	0.044	4.44865e-152	"3"	LAMB1
6.4157e-156	0.408247	0.347	0.02	1.17709e-151	"3"	ADGRA2
1.38707e-155	0.957132	0.597	0.099	2.54485e-151	"3"	SELENOM
4.16096e-154	1.05687	0.591	0.094	7.63412e-150	"3"	ITGA1
4.76597e-154	0.80994	0.503	0.062	8.74412e-150	"3"	FILIP1L
2.33264e-153	0.466606	0.4	0.031	4.27969e-149	"3"	DKK3
2.34091e-153	0.435234	0.394	0.031	4.29487e-149	"3"	RBPMS
2.73167e-153	0.451524	0.268	0.008	5.01179e-149	"3"	FHL2
3.05934e-153	0.420765	0.368	0.025	5.61297e-149	"3"	MSRB3
4.35676e-152	0.430932	0.338	0.02	7.99335e-148	"3"	GUCY1B1
7.40211e-152	1.01417	0.6	0.091	1.35806e-147	"3"	IGFBP4
3.89579e-151	0.947051	0.412	0.034	7.14761e-147	"3"	RARRES2
1.90009e-149	0.568956	0.397	0.033	3.48609e-145	"3"	CAMK2N1
3.31072e-149	0.354328	0.318	0.017	6.07417e-145	"3"	ECM1
1.058e-147	0.343659	0.276	0.01	1.94111e-143	"3"	RNF152
3.56804e-145	0.452226	0.444	0.045	6.54629e-141	"3"	PXDN
2.21158e-143	0.615868	0.365	0.028	4.05758e-139	"3"	PGF
2.43376e-141	0.507983	0.326	0.021	4.46521e-137	"3"	CYGB
4.92071e-141	0.478518	0.415	0.041	9.02803e-137	"3"	EBF1
1.30473e-139	0.407564	0.4	0.037	2.39379e-135	"3"	PLS3
2.96596e-139	0.360934	0.276	0.012	5.44164e-135	"3"	EDIL3
8.22549e-138	0.551094	0.262	0.01	1.50913e-133	"3"	COX4I2
1.50307e-136	0.316026	0.282	0.014	2.75768e-132	"3"	CERCAM
3.83051e-136	0.606212	0.476	0.062	7.02784e-132	"3"	COX7A1
4.65416e-136	0.456354	0.318	0.02	8.53898e-132	"3"	GJA4
5.02601e-136	0.463718	0.456	0.053	9.22122e-132	"3"	LAMB2
2.52298e-135	0.435897	0.276	0.013	4.62892e-131	"3"	OLFML3
4.40387e-134	1.09076	0.288	0.016	8.07977e-130	"3"	FBLN1
6.52013e-133	0.600169	0.403	0.042	1.19625e-128	"3"	FHL1
3.28912e-132	0.297118	0.282	0.015	6.03455e-128	"3"	PLEKHH3
6.02304e-132	0.384269	0.271	0.013	1.10505e-127	"3"	CTSK
4.7149e-131	0.744397	0.503	0.069	8.65043e-127	"3"	CAV1
1.25538e-130	0.705505	0.391	0.04	2.30325e-126	"3"	MEG3
6.53732e-130	0.364399	0.276	0.014	1.1994e-125	"3"	GEM
1.31469e-129	0.441816	0.321	0.023	2.41206e-125	"3"	CRISPLD2
5.78776e-129	0.400732	0.294	0.018	1.06188e-124	"3"	OLFML2A
6.00461e-129	0.44025	0.426	0.047	1.10167e-124	"3"	NID1
5.84658e-128	0.551822	0.338	0.027	1.07267e-123	"3"	LOXL2
7.2361e-128	0.494987	0.353	0.032	1.32761e-123	"3"	INAFM1
2.2694e-127	0.390965	0.347	0.03	4.16367e-123	"3"	AC245595.1
2.99086e-127	0.537106	0.397	0.043	5.48733e-123	"3"	JAG1
2.23341e-126	0.30722	0.274	0.015	4.09764e-122	"3"	GPX8
2.85986e-126	0.659916	0.465	0.066	5.24699e-122	"3"	PALLD
2.8463e-124	2.24986	0.882	0.383	5.2221e-120	"3"	TIMP1
4.9706e-124	0.9127	0.253	0.012	9.11956e-120	"3"	IGFBP6
1.00408e-123	0.783422	0.288	0.018	1.84219e-119	"3"	ELN
1.10572e-123	0.252756	0.253	0.012	2.02867e-119	"3"	YAP1
1.5661e-122	1.59973	0.35	0.032	2.87332e-118	"3"	IGFBP5
1.0078e-121	0.478488	0.424	0.05	1.84901e-117	"3"	ADGRF5
1.74555e-121	0.315047	0.3	0.021	3.20256e-117	"3"	PARVA
2.70169e-121	0.428609	0.374	0.039	4.9568e-117	"3"	FBLIM1
7.17527e-121	0.510112	0.359	0.035	1.31645e-116	"3"	MYO1B
1.87117e-119	0.475421	0.412	0.049	3.43303e-115	"3"	CAV2
3.86826e-119	0.591077	0.347	0.034	7.0971e-115	"3"	CSRP2
6.14211e-118	0.365016	0.315	0.026	1.12689e-113	"3"	C9orf3
6.01918e-117	0.356175	0.303	0.024	1.10434e-112	"3"	NEXN
3.54408e-116	0.404163	0.294	0.021	6.50232e-112	"3"	TNFAIP6
6.21796e-114	0.403743	0.397	0.048	1.14081e-109	"3"	CTTN
7.51186e-112	0.345588	0.303	0.025	1.3782e-107	"3"	GSTM3
5.2272e-111	0.590922	0.271	0.019	9.59034e-107	"3"	MYH11
1.61448e-107	0.28952	0.265	0.019	2.96208e-103	"3"	COPZ2
5.95227e-107	0.410849	0.271	0.02	1.09206e-102	"3"	CHN1
7.71346e-107	0.450694	0.426	0.058	1.41519e-102	"3"	HTRA1
9.42615e-107	0.52067	0.506	0.087	1.72942e-102	"3"	CRIP2
1.55025e-106	0.62002	0.274	0.021	2.84425e-102	"3"	KRT18
1.24185e-105	0.865669	0.447	0.075	2.27842e-101	"3"	PMEPA1
1.33981e-105	0.330955	0.259	0.018	2.45815e-101	"3"	NEURL1B
1.3025e-104	0.371214	0.335	0.037	2.38969e-100	"3"	FAM114A1
2.05043e-104	1.00769	0.947	0.522	3.76193e-100	"3"	ITGB1
4.81568e-103	0.395018	0.362	0.044	8.83533e-99	"3"	FERMT2
7.32711e-103	0.81813	0.335	0.037	1.3443e-98	"3"	ADIRF
1.52327e-102	1.04196	0.591	0.14	2.79474e-98	"3"	ID3
2.65e-100	0.440814	0.262	0.021	4.86196e-96	"3"	TNFRSF12A
6.1e-100	0.604231	0.606	0.152	1.11917e-95	"3"	LGALS3BP
7.21402e-100	0.798074	0.521	0.111	1.32356e-95	"3"	SERPING1
2.01809e-99	0.396091	0.294	0.028	3.70259e-95	"3"	ADAMTS1
5.00412e-99	0.309007	0.285	0.026	9.18107e-95	"3"	LRRC32
5.56196e-99	0.372868	0.294	0.028	1.02045e-94	"3"	PLAT
1.68293e-98	0.665304	0.565	0.133	3.08766e-94	"3"	PMP22
1.32644e-97	0.338291	0.306	0.032	2.43361e-93	"3"	BMP1
3.9339e-97	0.7522	0.359	0.048	7.21753e-93	"3"	RGS16
1.70368e-96	0.515111	0.547	0.123	3.12573e-92	"3"	TCEAL9
5.54561e-96	0.313077	0.297	0.03	1.01745e-91	"3"	PHLDB1
1.14603e-94	0.317638	0.279	0.026	2.10263e-90	"3"	FILIP1
1.87571e-94	0.452576	0.329	0.041	3.44136e-90	"3"	LTBP4
4.75455e-94	0.469815	0.35	0.048	8.72318e-90	"3"	NBL1
6.12226e-94	0.376559	0.376	0.055	1.12325e-89	"3"	TNS1
2.14099e-92	0.63146	0.565	0.143	3.92808e-88	"3"	CD151
4.89999e-90	0.303355	0.279	0.029	8.99001e-86	"3"	PTGIR
1.01917e-89	0.339395	0.338	0.045	1.86987e-85	"3"	ENAH
4.37789e-89	0.316545	0.356	0.051	8.03212e-85	"3"	RBFOX2
8.44809e-89	0.339552	0.326	0.043	1.54997e-84	"3"	RBMS3
1.53385e-88	0.505885	0.453	0.091	2.81416e-84	"3"	ITGAV
1.89323e-87	0.695117	0.409	0.071	3.47352e-83	"3"	SPON2
1.49228e-85	0.344134	0.253	0.023	2.73789e-81	"3"	INHBA
1.44189e-84	0.917321	0.844	0.362	2.64544e-80	"3"	IFITM3
2.9155e-84	0.343118	0.326	0.045	5.34907e-80	"3"	ANTXR1
5.22196e-84	0.269163	0.271	0.029	9.58074e-80	"3"	TUSC1
1.7323e-83	0.419781	0.371	0.062	3.17826e-79	"3"	PTK2
2.02975e-82	0.259588	0.265	0.028	3.72398e-78	"3"	NDN
4.18905e-82	0.625669	0.565	0.156	7.68565e-78	"3"	MAP1B
1.02997e-80	0.358481	0.321	0.045	1.88969e-76	"3"	RND3
4.9976e-80	0.40264	0.268	0.03	9.16911e-76	"3"	NES
8.84373e-80	0.419232	0.394	0.074	1.62256e-75	"3"	PDLIM7
5.17697e-79	0.297044	0.329	0.048	9.49819e-75	"3"	TJP1
1.88635e-78	0.600935	0.488	0.116	3.46089e-74	"3"	PDLIM1
3.10233e-78	0.331729	0.285	0.037	5.69184e-74	"3"	CYBRD1
7.28358e-78	0.326443	0.347	0.055	1.33632e-73	"3"	PPFIBP1
1.14842e-77	0.296139	0.291	0.038	2.10701e-73	"3"	TNS2
1.09244e-76	0.388393	0.306	0.045	2.0043e-72	"3"	MRC2
2.76063e-76	0.675075	0.485	0.122	5.06493e-72	"3"	HES4
8.13156e-75	0.482899	0.459	0.109	1.4919e-70	"3"	LIMA1
1.24578e-74	1.07738	0.715	0.379	2.28563e-70	"3"	DSTN
4.84071e-74	0.63051	0.462	0.116	8.88124e-70	"3"	PHLDA1
1.5283e-73	0.416415	0.406	0.087	2.80398e-69	"3"	VCL
2.38205e-73	0.374034	0.391	0.079	4.37034e-69	"3"	RCN1
1.32419e-72	0.318647	0.253	0.03	2.42948e-68	"3"	LMCD1
3.49518e-72	0.372378	0.415	0.088	6.41262e-68	"3"	AXL
5.26262e-72	0.298736	0.253	0.03	9.65533e-68	"3"	MYH10
1.44776e-70	0.279406	0.259	0.033	2.65621e-66	"3"	CDC42EP5
1.63407e-70	0.272305	0.288	0.042	2.99803e-66	"3"	SGCB
3.14393e-70	0.577323	0.406	0.089	5.76817e-66	"3"	MT1E
5.19698e-70	0.270472	0.268	0.036	9.5349e-66	"3"	NDRG2
3.83698e-69	0.329818	0.341	0.06	7.03971e-65	"3"	PLPP1
8.76178e-69	0.578239	0.524	0.16	1.60752e-64	"3"	EVA1B
1.95947e-68	0.57706	0.556	0.188	3.59504e-64	"3"	MAGED2
4.07909e-67	0.55391	0.529	0.167	7.48391e-63	"3"	SEPT11
1.77661e-65	0.3249	0.371	0.078	3.25954e-61	"3"	RAB34
1.84446e-64	0.713598	0.691	0.348	3.38404e-60	"3"	LAPTM4A
2.57314e-64	0.522776	0.506	0.155	4.72093e-60	"3"	CALU
9.88727e-64	0.361083	0.388	0.089	1.81402e-59	"3"	ARHGAP1
4.87762e-63	0.59383	0.432	0.118	8.94897e-59	"3"	CSRP1
2.1671e-62	0.4136	0.359	0.078	3.97597e-58	"3"	RBP1
2.79294e-62	0.302578	0.512	0.141	5.1242e-58	"3"	APP
2.80983e-61	0.338126	0.318	0.06	5.15519e-57	"3"	NFIA
3.27432e-60	0.85535	0.376	0.089	6.00739e-56	"3"	SERPINF1
8.95608e-60	0.493948	0.474	0.143	1.64317e-55	"3"	RRAS
1.50927e-59	0.929138	0.582	0.202	2.76906e-55	"3"	A2M
2.50256e-59	0.368509	0.362	0.083	4.59144e-55	"3"	NT5DC2
6.02419e-59	0.281444	0.271	0.044	1.10526e-54	"3"	AGRN
6.22026e-59	0.455388	0.447	0.124	1.14123e-54	"3"	RAB13
3.36169e-58	0.664205	0.668	0.282	6.1677e-54	"3"	LMNA
5.44145e-58	0.283715	0.259	0.042	9.98343e-54	"3"	DNAJB4
1.27187e-57	0.451921	0.294	0.056	2.33349e-53	"3"	GPX3
2.12693e-57	0.450949	0.359	0.081	3.90227e-53	"3"	S100A13
7.20583e-57	0.400717	0.421	0.116	1.32205e-52	"3"	MXRA7
1.98264e-56	0.685812	0.759	0.418	3.63755e-52	"3"	PTMS
2.61399e-56	0.255211	0.441	0.112	4.79588e-52	"3"	NUPR1
3.10002e-55	0.329143	0.35	0.081	5.6876e-51	"3"	FARP1
1.2295e-54	0.432877	0.553	0.196	2.25577e-50	"3"	BEX3
2.23681e-54	0.481553	0.303	0.063	4.10388e-50	"3"	PHLDA2
3.99354e-54	0.279215	0.291	0.057	7.32696e-50	"3"	MAP3K20
6.16737e-54	0.681798	0.574	0.225	1.13153e-49	"3"	EGR1
1.05971e-53	0.70685	0.979	0.777	1.94425e-49	"3"	CD63
5.14972e-53	0.468206	0.526	0.193	9.44819e-49	"3"	LPP
2.30256e-52	0.395123	0.321	0.068	4.22451e-48	"3"	NFIB
2.61323e-52	0.293026	0.282	0.056	4.7945e-48	"3"	FHL3
2.98195e-52	0.973578	0.606	0.252	5.47099e-48	"3"	GSN
3.24104e-52	0.287251	0.385	0.096	5.94634e-48	"3"	EMP2
7.48562e-52	0.441031	0.456	0.129	1.37339e-47	"3"	VCAN
1.33306e-51	0.533405	0.471	0.154	2.44576e-47	"3"	DST
7.0571e-51	0.294013	0.324	0.075	1.29477e-46	"3"	LTBP3
1.58263e-50	0.469699	0.529	0.187	2.90365e-46	"3"	SPTBN1
2.49385e-50	0.274915	0.303	0.066	4.57547e-46	"3"	CKAP4
1.5158e-49	0.534883	0.476	0.168	2.78105e-45	"3"	ACTN1
4.52818e-49	0.964642	0.959	0.676	8.30785e-45	"3"	LGALS1
1.62108e-48	0.254349	0.271	0.054	2.9742e-44	"3"	DBN1
1.92911e-48	0.888691	0.994	0.917	3.53934e-44	"3"	VIM
2.32326e-48	0.30589	0.321	0.078	4.26249e-44	"3"	PEAK1
2.71106e-48	0.496608	0.562	0.223	4.97399e-44	"3"	SOX4
6.94642e-48	0.553438	0.459	0.16	1.27446e-43	"3"	MIR4435-2HG
3.37595e-47	0.488856	0.576	0.237	6.19386e-43	"3"	CD59
4.49366e-47	0.573749	0.506	0.206	8.24452e-43	"3"	PDLIM2
5.21725e-47	0.637534	0.906	0.626	9.57209e-43	"3"	TUBA1A
5.65018e-47	0.290331	0.324	0.08	1.03664e-42	"3"	TAX1BP3
7.31604e-46	0.27296	0.318	0.078	1.34227e-41	"3"	MYO1C
1.13429e-45	0.315294	0.332	0.086	2.08107e-41	"3"	KLF9
2.50266e-45	0.328271	0.362	0.103	4.59163e-41	"3"	MAP1LC3A
3.01594e-45	0.499335	0.506	0.197	5.53335e-41	"3"	RHOC
1.19025e-44	0.40689	0.5	0.197	2.18374e-40	"3"	PRDX4
1.49193e-43	0.322166	0.4	0.123	2.73725e-39	"3"	EPB41L2
2.19344e-43	0.460972	0.335	0.087	4.0243e-39	"3"	THBS1
3.15288e-43	0.307194	0.344	0.097	5.78459e-39	"3"	ABI2
3.43647e-43	0.329034	0.315	0.082	6.30488e-39	"3"	NREP
7.02092e-43	0.280661	0.265	0.06	1.28813e-38	"3"	RHOBTB3
1.06522e-42	0.255746	0.376	0.106	1.95436e-38	"3"	NRP1
1.1374e-42	0.364451	0.488	0.184	2.08678e-38	"3"	MAP4
1.63198e-42	0.252344	0.279	0.066	2.99419e-38	"3"	PELO
2.47841e-42	0.263003	0.294	0.073	4.54714e-38	"3"	SORBS3
1.40465e-41	1.11553	0.462	0.186	2.57712e-37	"3"	RGS5
2.93112e-41	0.340851	0.315	0.082	5.37773e-37	"3"	F2R
6.09882e-41	0.287838	0.382	0.121	1.11895e-36	"3"	PGRMC1
1.16324e-40	0.342374	0.353	0.109	2.1342e-36	"3"	HCFC1R1
1.75167e-40	0.335704	0.329	0.091	3.21379e-36	"3"	SPRY1
4.32014e-40	0.350655	0.335	0.096	7.92615e-36	"3"	GAS6
7.46087e-40	0.700111	0.671	0.413	1.36885e-35	"3"	TPM4
1.19216e-39	0.764173	0.603	0.324	2.18726e-35	"3"	HSPB1
1.24351e-38	0.284779	0.347	0.103	2.28147e-34	"3"	CLIC4
2.00908e-38	0.33088	0.394	0.134	3.68605e-34	"3"	MPRIP
3.04789e-38	0.468388	0.921	0.717	5.59197e-34	"3"	PPIB
3.30451e-38	0.35581	0.403	0.142	6.06279e-34	"3"	SPATS2L
1.48376e-37	0.294262	0.371	0.122	2.72226e-33	"3"	ROCK2
5.50487e-37	0.354659	0.297	0.078	1.00998e-32	"3"	EMP1
9.01969e-37	0.332224	0.412	0.153	1.65484e-32	"3"	REXO2
5.59492e-36	0.256771	0.291	0.081	1.0265e-31	"3"	METRN
7.75655e-36	0.405819	0.776	0.48	1.42309e-31	"3"	MGST3
1.46767e-34	0.526462	0.618	0.37	2.69274e-30	"3"	SELENOW
4.65304e-34	0.259258	0.315	0.098	8.53693e-30	"3"	CSNK1E
5.83567e-34	0.313207	0.376	0.137	1.07067e-29	"3"	CPQ
1.70806e-33	0.330054	0.432	0.172	3.13379e-29	"3"	TCEAL4
7.8306e-33	0.697957	0.515	0.267	1.43668e-28	"3"	CYTOR
1.89789e-32	0.252296	0.274	0.077	3.48206e-28	"3"	TMEM204
3.89585e-32	0.330522	0.471	0.204	7.14772e-28	"3"	CYB5R3
3.94471e-32	0.354021	0.406	0.163	7.23736e-28	"3"	NFIC
7.47804e-32	0.351902	0.482	0.218	1.372e-27	"3"	LEPROT
1.01466e-31	0.34708	0.491	0.226	1.86159e-27	"3"	VKORC1
1.08125e-31	0.34128	0.453	0.197	1.98378e-27	"3"	MORF4L2
3.66588e-31	0.613841	0.274	0.081	6.72579e-27	"3"	HSPA1B
6.15448e-31	0.457295	0.615	0.396	1.12916e-26	"3"	RABAC1
8.42082e-31	0.257815	0.324	0.11	1.54497e-26	"3"	ARL3
1.73514e-30	0.482759	0.374	0.145	3.18347e-26	"3"	TSC22D1
4.43165e-30	0.365702	0.362	0.136	8.13075e-26	"3"	IER5L
4.49099e-30	0.396578	0.485	0.238	8.23961e-26	"3"	RRBP1
3.23693e-29	0.772298	0.818	0.544	5.9388e-25	"3"	MT2A
2.26658e-28	0.291427	0.562	0.275	4.15849e-24	"3"	TCF4
5.43609e-28	0.320405	0.45	0.208	9.9736e-24	"3"	PSMB5
6.22905e-28	0.385135	0.85	0.644	1.14284e-23	"3"	SEPT7
8.01469e-28	0.25084	0.329	0.121	1.47046e-23	"3"	PDLIM5
1.0159e-27	0.390584	0.891	0.712	1.86387e-23	"3"	DYNLL1
1.46937e-27	0.296205	0.415	0.175	2.69585e-23	"3"	ITM2C
1.63016e-27	0.257178	0.338	0.127	2.99085e-23	"3"	REEP3
1.04334e-25	0.349296	0.835	0.592	1.91422e-21	"3"	CD99
1.54526e-25	0.255691	0.315	0.118	2.83509e-21	"3"	IKBIP
3.61344e-25	0.415275	0.612	0.388	6.62958e-21	"3"	C12orf57
4.83517e-25	0.373928	0.95	0.746	8.87108e-21	"3"	CD81
6.70488e-24	0.478816	0.391	0.178	1.23014e-19	"3"	LRP1
9.90207e-24	0.282681	0.388	0.18	1.81673e-19	"3"	ILK
9.96363e-24	0.338523	0.444	0.22	1.82803e-19	"3"	ARID5B
3.86632e-23	0.315477	0.476	0.262	7.09353e-19	"3"	KDELR1
3.00779e-22	0.331863	0.421	0.208	5.51839e-18	"3"	ZBTB20
4.8105e-22	0.268461	0.376	0.175	8.82582e-18	"3"	YIF1A
1.09748e-21	0.358348	0.468	0.265	2.01355e-17	"3"	ARF4
1.41495e-21	0.335753	0.974	0.9	2.596e-17	"3"	GNAS
2.98942e-21	0.340157	0.379	0.17	5.48469e-17	"3"	TGFBI
4.9969e-21	0.358696	0.762	0.554	9.16782e-17	"3"	TUBB
8.29272e-21	0.349998	0.624	0.455	1.52147e-16	"3"	EID1
1.71976e-20	0.292183	0.394	0.199	3.15525e-16	"3"	HDLBP
1.85216e-20	0.307331	0.862	0.729	3.39816e-16	"3"	SLC25A3
4.09685e-20	0.335915	0.494	0.296	7.51648e-16	"3"	KDELR2
2.77937e-19	0.333456	0.921	0.816	5.09931e-15	"3"	CALM2
3.53825e-19	0.28396	0.282	0.115	6.49163e-15	"3"	MMP14
3.56224e-19	0.301361	0.465	0.261	6.53565e-15	"3"	ANXA6
4.29819e-19	0.262638	0.3	0.128	7.88589e-15	"3"	TUBB2A
6.76265e-18	0.558497	0.853	0.682	1.24074e-13	"3"	JUN
9.79979e-18	0.259404	0.368	0.182	1.79797e-13	"3"	IL6ST
1.26638e-17	0.280508	0.753	0.578	2.32343e-13	"3"	TMEM59
1.63216e-17	0.296727	0.788	0.556	2.99452e-13	"3"	ANXA5
2.21203e-17	0.254813	0.429	0.236	4.05842e-13	"3"	PTEN
3.47136e-17	0.304203	0.788	0.65	6.3689e-13	"3"	NDUFS5
3.89606e-16	0.365979	0.562	0.399	7.1481e-12	"3"	P4HB
8.61125e-16	0.518921	0.529	0.37	1.57991e-11	"3"	VMP1
4.04141e-15	0.294008	0.559	0.351	7.41478e-11	"3"	TIMP2
5.51375e-15	0.264364	0.406	0.243	1.01161e-10	"3"	NENF
1.58389e-14	0.331602	0.526	0.382	2.90596e-10	"3"	OSTC
1.8572e-14	0.250261	0.674	0.502	3.40741e-10	"3"	PDIA3
2.42464e-14	0.366093	0.553	0.414	4.44849e-10	"3"	MYH9
5.73747e-14	0.283998	0.524	0.364	1.05265e-09	"3"	PHPT1
6.24518e-14	0.371474	0.571	0.411	1.1458e-09	"3"	FLNA
3.86274e-12	0.347015	0.3	0.167	7.08696e-08	"3"	NPY
3.93731e-12	0.290302	0.991	0.972	7.22379e-08	"3"	ACTG1
5.99418e-12	0.334406	0.329	0.186	1.09975e-07	"3"	TUBB2B
7.46485e-11	0.313185	0.35	0.205	1.36958e-06	"3"	IER3
2.05018e-10	0.277592	0.865	0.716	3.76146e-06	"3"	TUBA1B
6.85827e-10	0.305857	0.465	0.327	1.25829e-05	"3"	ACTN4
7.30358e-09	0.891129	0.379	0.27	0.000133999	"3"	HSPA1A
7.42034e-09	0.276524	0.338	0.216	0.000136141	"3"	MEF2C
1.9518e-08	0.320387	0.438	0.328	0.000358097	"3"	SLC38A2
1.78094e-07	0.304494	0.765	0.64	0.0032675	"3"	FOSB
3.07135e-07	0.300898	0.979	0.975	0.00563501	"3"	MYL6
0.00253236	0.36945	0.406	0.339	1	"3"	MACF1
0.00697864	0.741792	0.185	0.273	1	"3"	ODC1
0	2.00297	0.941	0.061	0	"4"	FCN1
0	1.50508	0.65	0.028	0	"4"	S100A12
7.19159e-291	0.74893	0.561	0.022	1.31944e-286	"4"	CD300E
1.30593e-284	2.14834	0.888	0.107	2.39599e-280	"4"	S100A8
6.64262e-224	1.23194	0.772	0.105	1.21872e-219	"4"	AC020656.1
5.0914e-214	1.55907	0.759	0.106	9.3412e-210	"4"	VCAN
4.04845e-211	1.50747	0.726	0.093	7.4277e-207	"4"	IL1B
1.69292e-207	1.1594	0.521	0.036	3.106e-203	"4"	APOBEC3A
6.9354e-205	1.06277	0.815	0.128	1.27244e-200	"4"	MNDA
2.09528e-204	0.680344	0.667	0.073	3.8442e-200	"4"	CFP
2.96219e-202	0.701851	0.68	0.078	5.43474e-198	"4"	FPR1
3.27453e-197	0.868543	0.809	0.132	6.00779e-193	"4"	CSTA
1.29424e-187	2.25008	0.997	0.422	2.37454e-183	"4"	LYZ
3.99121e-183	1.0555	0.917	0.198	7.32268e-179	"4"	SERPINA1
2.00734e-182	0.821257	0.706	0.096	3.68286e-178	"4"	SLC11A1
4.32125e-181	0.42043	0.393	0.02	7.9282e-177	"4"	AC245128.3
4.1001e-172	2.29818	0.941	0.327	7.52246e-168	"4"	S100A9
5.2814e-169	0.669851	0.353	0.016	9.68979e-165	"4"	EREG
3.07189e-167	0.407468	0.462	0.037	5.636e-163	"4"	C19orf38
1.06337e-162	0.460146	0.442	0.035	1.95097e-158	"4"	NLRP3
9.29941e-161	1.04979	0.861	0.197	1.70616e-156	"4"	FGL2
1.3369e-145	0.861647	0.937	0.284	2.45282e-141	"4"	LST1
5.13429e-145	0.456182	0.446	0.043	9.41987e-141	"4"	ASGR1
9.00464e-145	0.908795	0.901	0.24	1.65208e-140	"4"	CYBB
2.84601e-144	0.53203	0.637	0.098	5.22157e-140	"4"	CSF3R
3.52783e-143	0.582563	0.587	0.086	6.47251e-139	"4"	LILRB2
8.8011e-136	1.28665	0.997	0.615	1.61474e-131	"4"	CTSS
9.28584e-136	1.00601	0.917	0.32	1.70367e-131	"4"	NAMPT
1.15929e-134	0.746235	0.772	0.174	2.12695e-130	"4"	KLF4
4.97319e-134	1.0117	0.838	0.217	9.12432e-130	"4"	PLAUR
1.47665e-133	0.445527	0.508	0.064	2.7092e-129	"4"	TLR2
3.15675e-131	0.705828	0.789	0.186	5.7917e-127	"4"	CLEC7A
2.38481e-124	0.484082	0.432	0.048	4.3754e-120	"4"	LILRA5
2.13022e-123	0.840716	0.762	0.186	3.90832e-119	"4"	CPVL
3.0632e-121	0.904507	0.818	0.263	5.62006e-117	"4"	AP1S2
5.87749e-121	0.666654	0.66	0.138	1.07834e-116	"4"	NCF2
6.36553e-121	0.479662	0.561	0.092	1.16788e-116	"4"	LILRB3
8.5379e-119	0.839993	0.7	0.16	1.56645e-114	"4"	C5AR1
1.07995e-117	0.503924	0.432	0.053	1.98139e-113	"4"	CLEC12A
4.85466e-117	0.717544	0.36	0.033	8.90685e-113	"4"	RETN
1.21584e-114	0.744006	0.815	0.246	2.23069e-110	"4"	C1orf162
7.49654e-114	1.01573	0.967	0.424	1.37539e-109	"4"	AIF1
9.26341e-113	0.470289	0.518	0.086	1.69956e-108	"4"	IRAK3
3.24293e-112	1.10815	0.561	0.101	5.94981e-108	"4"	G0S2
2.03737e-111	0.33176	0.356	0.035	3.73796e-107	"4"	PRAM1
4.37158e-110	0.533477	0.594	0.115	8.02053e-106	"4"	FGR
1.08942e-109	0.337827	0.35	0.035	1.99875e-105	"4"	CD1D
4.97581e-109	0.438877	0.469	0.066	9.12912e-105	"4"	TREM1
7.81189e-108	1.0259	0.99	0.485	1.43325e-103	"4"	TYROBP
1.23608e-107	0.344801	0.356	0.037	2.26783e-103	"4"	LILRA2
5.56334e-104	0.635698	0.64	0.149	1.02071e-99	"4"	JAML
2.93362e-102	0.599469	0.653	0.158	5.38232e-98	"4"	STXBP2
3.31869e-102	1.09299	0.957	0.565	6.0888e-98	"4"	TYMP
3.94312e-102	0.407934	0.584	0.107	7.23445e-98	"4"	CD93
6.68268e-102	0.666163	0.713	0.184	1.22607e-97	"4"	MPEG1
3.33097e-100	0.934536	0.997	0.547	6.11133e-96	"4"	CST3
1.93629e-99	0.274184	0.281	0.023	3.55251e-95	"4"	TMEM170B
4.36207e-99	0.50081	0.591	0.12	8.00309e-95	"4"	CD36
6.06871e-99	0.599274	0.465	0.072	1.11343e-94	"4"	LGALS2
8.2449e-99	0.666373	0.779	0.195	1.51269e-94	"4"	MS4A6A
4.76478e-98	0.742913	0.601	0.144	8.74194e-94	"4"	PPIF
1.92105e-96	0.961865	0.997	0.812	3.52456e-92	"4"	SRGN
5.54233e-94	0.366671	0.422	0.064	1.01685e-89	"4"	ADGRE2
7.74061e-94	0.509218	0.554	0.117	1.42017e-89	"4"	PLBD1
1.30694e-92	0.4205	0.518	0.103	2.39785e-88	"4"	CD302
1.37793e-92	0.507494	0.624	0.151	2.52809e-88	"4"	GCA
1.1031e-91	0.461463	0.485	0.091	2.02386e-87	"4"	LILRB1
1.99978e-89	0.686441	0.865	0.289	3.66899e-85	"4"	CD14
1.58775e-88	0.773324	0.947	0.617	2.91304e-84	"4"	COTL1
8.78911e-88	0.605656	0.525	0.113	1.61254e-83	"4"	HBEGF
1.26635e-87	0.361662	0.37	0.051	2.32337e-83	"4"	LRRK2
2.62114e-87	0.8997	0.997	0.897	4.80901e-83	"4"	NEAT1
1.89415e-85	0.595573	0.601	0.16	3.4752e-81	"4"	LTA4H
2.86728e-85	0.449668	0.531	0.115	5.2606e-81	"4"	MXD1
1.46584e-84	0.858322	0.795	0.295	2.68938e-80	"4"	CEBPD
5.20341e-84	0.454966	0.597	0.149	9.54669e-80	"4"	HCK
5.76143e-84	0.415739	0.498	0.103	1.05705e-79	"4"	CPPED1
1.95876e-83	0.463938	0.502	0.108	3.59375e-79	"4"	SLC43A2
2.15314e-83	0.688125	0.7	0.211	3.95036e-79	"4"	BCL2A1
5.05775e-82	0.595181	0.726	0.241	9.27946e-78	"4"	PTPRE
2.0734e-81	0.586568	0.782	0.258	3.80407e-77	"4"	SPI1
6.72009e-81	0.396873	0.482	0.096	1.23294e-76	"4"	ACSL1
2.77416e-80	0.662871	0.614	0.167	5.08974e-76	"4"	DUSP6
4.71734e-80	0.732176	0.901	0.576	8.6549e-76	"4"	TSPO
6.54688e-80	0.321725	0.353	0.053	1.20116e-75	"4"	BST1
8.09554e-80	0.637846	0.746	0.269	1.48529e-75	"4"	TNFRSF1B
2.54637e-78	0.545665	0.68	0.199	4.67183e-74	"4"	TNFSF13B
6.29309e-78	0.353523	0.38	0.062	1.15459e-73	"4"	ANPEP
1.43071e-77	0.354757	0.465	0.096	2.62493e-73	"4"	CLEC4A
4.66161e-75	0.438036	0.581	0.155	8.55266e-71	"4"	SLC7A7
6.18006e-75	0.373204	0.462	0.098	1.13386e-70	"4"	ZNF385A
6.73145e-75	0.883987	0.96	0.804	1.23502e-70	"4"	S100A6
7.49043e-75	0.314152	0.33	0.049	1.37427e-70	"4"	MEGF9
8.51546e-75	0.718028	0.779	0.338	1.56233e-70	"4"	TKT
1.60882e-74	0.601369	0.69	0.241	2.95171e-70	"4"	VSIR
1.73366e-74	0.43216	0.373	0.063	3.18075e-70	"4"	OLR1
8.26131e-74	0.255873	0.307	0.041	1.5157e-69	"4"	RBP7
1.0886e-73	0.777963	1	0.992	1.99725e-69	"4"	FTH1
8.23237e-73	0.691062	0.954	0.46	1.51039e-68	"4"	FCER1G
3.29307e-72	0.856448	0.97	0.704	6.0418e-68	"4"	S100A4
8.1641e-72	0.333122	0.479	0.101	1.49787e-67	"4"	SMIM25
2.8534e-71	0.39079	0.578	0.15	5.23514e-67	"4"	PILRA
6.66146e-71	0.275815	0.323	0.049	1.22218e-66	"4"	SIGLEC14
1.06619e-70	0.46186	0.505	0.128	1.95615e-66	"4"	NUP214
1.16113e-70	0.436522	0.578	0.157	2.13033e-66	"4"	ITGAX
2.48487e-70	0.314172	0.67	0.196	4.55899e-66	"4"	CFD
5.74206e-70	0.722132	0.406	0.084	1.0535e-65	"4"	THBS1
8.50726e-69	0.392378	0.482	0.118	1.56083e-64	"4"	STX11
1.03428e-68	0.451321	0.482	0.114	1.89759e-64	"4"	IFI30
1.11024e-68	0.392363	0.604	0.174	2.03697e-64	"4"	ALDH2
3.47515e-68	0.532268	1	0.943	6.37585e-64	"4"	OAZ1
7.76319e-68	0.636285	0.818	0.352	1.42431e-63	"4"	ZEB2
3.93805e-67	0.49368	0.683	0.236	7.22514e-63	"4"	LYN
4.14948e-67	0.464047	0.558	0.16	7.61305e-63	"4"	GPCPD1
5.70686e-67	0.571983	0.736	0.271	1.04704e-62	"4"	RGS2
8.49805e-67	0.364394	0.63	0.178	1.55914e-62	"4"	FCGR2A
9.3489e-67	0.488291	0.518	0.143	1.71524e-62	"4"	ATP2B1-AS1
4.95214e-66	0.295989	0.353	0.064	9.08569e-62	"4"	SECTM1
1.25211e-65	0.568666	0.782	0.345	2.29725e-61	"4"	PYCARD
1.68374e-65	0.605689	0.776	0.338	3.08917e-61	"4"	SERPINB1
1.94057e-64	0.560539	0.957	0.619	3.56037e-60	"4"	ITGB2
8.10324e-63	0.388245	0.475	0.122	1.4867e-58	"4"	OGFRL1
1.16232e-62	0.312638	0.396	0.082	2.13251e-58	"4"	P2RY13
1.18684e-62	0.383359	0.528	0.144	2.17749e-58	"4"	DMXL2
4.56293e-62	0.385964	0.521	0.147	8.37161e-58	"4"	THEMIS2
8.44243e-62	0.500805	0.617	0.196	1.54893e-57	"4"	ATF3
1.70705e-61	0.573488	0.993	0.817	3.13193e-57	"4"	S100A11
2.32829e-61	0.470769	0.528	0.149	4.2717e-57	"4"	WARS
2.502e-61	0.410262	0.337	0.063	4.59041e-57	"4"	OSM
2.83526e-61	0.606209	1	0.899	5.20185e-57	"4"	SH3BGRL3
8.83643e-61	0.416749	0.564	0.168	1.62122e-56	"4"	KCTD12
1.27234e-60	0.425067	0.442	0.109	2.33437e-56	"4"	VEGFA
2.19412e-60	0.604842	0.739	0.294	4.02554e-56	"4"	SOD2
3.27762e-60	0.556366	0.601	0.186	6.01345e-56	"4"	MAFB
2.46566e-59	0.704241	0.508	0.138	4.52374e-55	"4"	CXCL8
2.69811e-59	0.338009	0.389	0.086	4.95022e-55	"4"	TRIB1
3.39109e-59	0.485067	0.611	0.208	6.22164e-55	"4"	METRNL
6.43619e-59	0.329698	0.571	0.165	1.18085e-54	"4"	LRP1
2.83989e-58	0.608954	0.578	0.187	5.21035e-54	"4"	IER3
2.97579e-58	0.407826	0.99	0.603	5.45968e-54	"4"	PSAP
3.57029e-58	0.266714	0.267	0.041	6.55042e-54	"4"	AC015912.3
5.39376e-58	0.398734	0.304	0.053	9.89594e-54	"4"	PTGS2
8.05459e-58	0.307463	0.327	0.06	1.47777e-53	"4"	AQP9
1.34534e-57	0.326549	0.37	0.078	2.46829e-53	"4"	FCGR1A
1.94657e-57	0.452147	0.683	0.269	3.57137e-53	"4"	ARRB2
4.81624e-57	0.51117	0.845	0.46	8.83636e-53	"4"	EFHD2
5.73427e-57	0.595499	0.884	0.619	1.05207e-52	"4"	MCL1
6.28961e-57	0.316567	0.62	0.186	1.15395e-52	"4"	MS4A7
1.11281e-56	0.481774	0.729	0.287	2.04167e-52	"4"	PLEK
1.14664e-56	0.305014	0.327	0.064	2.10373e-52	"4"	HRH2
1.99932e-56	0.583528	0.99	0.785	3.66815e-52	"4"	SAT1
3.17623e-56	0.498547	0.693	0.253	5.82744e-52	"4"	SGK1
5.46439e-56	0.646903	0.871	0.567	1.00255e-51	"4"	CD44
7.48447e-56	0.308813	0.389	0.091	1.37318e-51	"4"	ODF3B
2.58217e-55	0.37406	0.479	0.138	4.73751e-51	"4"	KLF10
3.94336e-55	0.445155	0.607	0.218	7.23488e-51	"4"	CASP1
1.02207e-54	0.521273	0.934	0.661	1.8752e-50	"4"	LCP1
1.43329e-54	0.30465	0.396	0.096	2.62966e-50	"4"	C9orf72
1.60321e-54	0.436296	0.611	0.224	2.94142e-50	"4"	PLSCR1
2.99874e-54	0.512122	1	0.991	5.50179e-50	"4"	ACTB
3.79973e-54	0.405488	0.564	0.183	6.97136e-50	"4"	AOAH
8.8225e-54	0.377169	0.498	0.148	1.61866e-49	"4"	MARCH1
2.69786e-53	0.426101	0.409	0.108	4.94976e-49	"4"	DSE
2.79356e-53	0.310577	0.429	0.113	5.12534e-49	"4"	RXRA
3.79081e-53	0.25436	0.297	0.056	6.95499e-49	"4"	FGD4
3.73482e-52	0.46946	0.673	0.277	6.85227e-48	"4"	EVI2B
7.55891e-52	0.497346	0.743	0.33	1.38683e-47	"4"	APLP2
8.46961e-52	0.449643	0.518	0.167	1.55392e-47	"4"	NR4A1
1.3791e-51	0.316155	0.393	0.099	2.53023e-47	"4"	IL17RA
2.21486e-51	0.358795	0.479	0.144	4.06361e-47	"4"	SMCO4
6.48447e-51	0.301563	0.419	0.113	1.18971e-46	"4"	TET2
9.01884e-51	0.253032	0.683	0.225	1.65469e-46	"4"	IGSF6
1.01012e-50	0.526182	0.792	0.397	1.85327e-46	"4"	TIMP1
1.20709e-50	0.431515	0.574	0.208	2.21465e-46	"4"	FOSL2
2.38074e-50	0.324197	0.432	0.119	4.36794e-46	"4"	MYD88
4.50724e-50	0.374192	1	0.986	8.26943e-46	"4"	H3F3A
6.49697e-50	0.328826	0.409	0.111	1.192e-45	"4"	EMILIN2
3.39871e-49	0.471432	0.977	0.741	6.23561e-45	"4"	LAPTM5
8.59959e-49	0.359404	0.597	0.221	1.57777e-44	"4"	RNF149
9.50675e-49	0.288868	0.343	0.081	1.7442e-44	"4"	KYNU
1.11766e-48	0.387581	0.693	0.265	2.05057e-44	"4"	RNF130
1.71797e-48	0.342235	0.271	0.049	3.15196e-44	"4"	IL1RN
2.80961e-48	0.344237	0.521	0.168	5.1548e-44	"4"	TNFAIP2
5.31419e-48	0.37318	0.446	0.132	9.74995e-44	"4"	CDKN1A
1.36432e-47	0.438715	0.779	0.381	2.50312e-43	"4"	H2AFY
1.66926e-47	0.449345	0.568	0.215	3.06259e-43	"4"	KDM6B
2.27059e-47	0.326083	0.449	0.133	4.16585e-43	"4"	BACH1
2.61001e-47	0.495719	0.729	0.364	4.78859e-43	"4"	SAMHD1
4.76398e-47	0.360789	0.475	0.149	8.74047e-43	"4"	PLXDC2
5.29984e-47	0.330502	0.422	0.119	9.72362e-43	"4"	ETS2
5.75118e-47	0.442977	0.894	0.644	1.05517e-42	"4"	SERP1
1.13469e-46	0.543801	0.812	0.448	2.08182e-42	"4"	CEBPB
1.44505e-46	0.290868	0.422	0.121	2.65123e-42	"4"	SH3BP2
6.23456e-46	0.42001	0.637	0.27	1.14386e-41	"4"	GLIPR1
6.71579e-46	0.575494	0.904	0.629	1.23215e-41	"4"	FOSB
8.82288e-46	0.29157	0.356	0.091	1.61873e-41	"4"	RIPK2
1.47856e-45	0.355468	0.323	0.076	2.71272e-41	"4"	GK
1.35609e-44	0.33941	0.413	0.119	2.48801e-40	"4"	CCR1
3.22267e-44	0.315543	0.472	0.154	5.91264e-40	"4"	TBXAS1
4.85625e-44	0.354031	0.627	0.255	8.90976e-40	"4"	CNPY3
5.12432e-44	0.326261	0.475	0.155	9.40159e-40	"4"	RAB31
7.53017e-44	0.59584	0.96	0.616	1.38156e-39	"4"	HLA-DRA
8.28816e-44	0.345444	0.406	0.122	1.52063e-39	"4"	IRS2
9.80093e-44	0.413385	0.429	0.134	1.79818e-39	"4"	SERPINB9
1.00784e-43	0.42802	0.95	0.635	1.84908e-39	"4"	BRI3
1.20607e-43	0.446752	0.997	0.917	2.21277e-39	"4"	CYBA
1.56189e-43	0.422833	0.7	0.313	2.86561e-39	"4"	YBX3
3.66408e-43	0.346388	0.492	0.158	6.72248e-39	"4"	CSF1R
6.7049e-43	0.320705	0.389	0.113	1.23015e-38	"4"	ATP13A3
8.27918e-43	0.296548	0.366	0.099	1.51898e-38	"4"	ITGAM
1.17297e-42	0.290502	0.419	0.126	2.15206e-38	"4"	NAIP
1.43713e-42	0.335396	0.505	0.177	2.6367e-38	"4"	RASGEF1B
2.21023e-42	0.383418	0.964	0.789	4.05511e-38	"4"	GNAI2
3.37779e-42	0.366599	0.475	0.158	6.19723e-38	"4"	POU2F2
9.42048e-42	0.326713	0.419	0.13	1.72837e-37	"4"	AHR
1.01038e-41	0.335826	0.908	0.498	1.85374e-37	"4"	GRN
1.78059e-41	0.39188	0.706	0.326	3.26685e-37	"4"	CARD16
2.59004e-41	0.374312	0.591	0.234	4.75195e-37	"4"	IFNGR2
9.39183e-41	0.345829	0.551	0.208	1.72312e-36	"4"	ADA2
1.00729e-40	0.349455	0.426	0.138	1.84808e-36	"4"	OTUD1
1.78219e-40	0.445407	0.574	0.242	3.26979e-36	"4"	ATP2B1
3.12815e-40	0.354394	0.673	0.285	5.73922e-36	"4"	PPT1
1.95067e-39	0.427026	0.584	0.245	3.5789e-35	"4"	CD55
5.30878e-39	0.446875	0.855	0.635	9.74002e-35	"4"	PRELID1
2.8602e-38	0.291903	0.472	0.164	5.24761e-34	"4"	LY86
3.74839e-38	0.461888	0.657	0.318	6.87717e-34	"4"	ZFAND5
4.72493e-38	0.270418	0.409	0.133	8.66882e-34	"4"	MAPKAPK3
5.67776e-38	0.302956	0.356	0.104	1.0417e-33	"4"	NFIL3
9.09158e-38	0.257213	0.37	0.109	1.66803e-33	"4"	LRRC25
1.08079e-37	0.304773	0.512	0.2	1.98292e-33	"4"	ATG3
1.54065e-37	0.273141	0.38	0.118	2.82664e-33	"4"	DPYD
1.69851e-37	0.263011	0.63	0.249	3.11625e-33	"4"	BLVRB
2.72202e-37	0.311786	0.571	0.229	4.9941e-33	"4"	MYO1F
4.48615e-37	0.358477	0.488	0.192	8.23074e-33	"4"	AGTRAP
8.09812e-37	0.285887	0.439	0.152	1.48576e-32	"4"	GNAQ
1.69906e-36	0.344835	0.578	0.232	3.11727e-32	"4"	CD83
2.89654e-36	0.360385	0.67	0.291	5.31429e-32	"4"	CTSH
4.49632e-36	0.263852	0.36	0.109	8.24939e-32	"4"	LAT2
4.69507e-36	0.502418	0.974	0.771	8.61405e-32	"4"	DUSP1
1.45102e-35	0.27189	0.459	0.164	2.66218e-31	"4"	SNX10
2.70713e-35	0.303393	0.508	0.193	4.96678e-31	"4"	PHACTR1
4.6349e-35	0.287233	0.409	0.136	8.50365e-31	"4"	C3AR1
6.37086e-35	0.336385	0.601	0.279	1.16886e-30	"4"	ATP6V0D1
2.17734e-34	0.254325	0.34	0.102	3.99476e-30	"4"	FAM49A
2.68666e-34	0.253608	0.419	0.142	4.92921e-30	"4"	PIK3AP1
2.99709e-34	0.388499	0.452	0.171	5.49877e-30	"4"	MX2
3.86439e-34	0.254181	0.31	0.088	7.09e-30	"4"	ARL5B
5.52362e-34	0.372876	0.743	0.398	1.01342e-29	"4"	FLNA
6.9497e-34	0.287563	0.439	0.162	1.27506e-29	"4"	LACTB
8.71885e-34	0.355173	0.558	0.252	1.59965e-29	"4"	IRF2BP2
9.50391e-34	0.378741	0.736	0.416	1.74368e-29	"4"	TALDO1
1.20604e-33	0.342246	0.65	0.323	2.21272e-29	"4"	CMTM6
1.40927e-33	0.33161	0.63	0.304	2.58558e-29	"4"	VASP
2.50321e-33	0.395688	0.587	0.273	4.59265e-29	"4"	HIF1A
7.29568e-33	0.27717	0.31	0.09	1.33854e-28	"4"	NR4A3
1.0254e-32	0.33019	0.983	0.88	1.8813e-28	"4"	PABPC1
3.18399e-32	0.302824	0.545	0.23	5.84166e-28	"4"	ATP6V1B2
3.5973e-32	0.303768	0.581	0.265	6.59997e-28	"4"	WAS
5.09391e-32	0.298267	0.337	0.105	9.34579e-28	"4"	CALHM6
9.46741e-32	0.29212	0.436	0.167	1.73699e-27	"4"	CSRNP1
1.04033e-31	0.253628	0.432	0.16	1.9087e-27	"4"	UBE2D1
1.46265e-31	0.44335	0.875	0.661	2.68353e-27	"4"	NFKBIA
1.61001e-31	0.30103	0.551	0.246	2.95388e-27	"4"	ZYX
1.99505e-31	0.305376	0.512	0.219	3.66032e-27	"4"	BID
2.8661e-31	0.312673	0.604	0.283	5.25844e-27	"4"	QKI
5.39594e-31	0.505214	0.548	0.258	9.89993e-27	"4"	NCF1
7.48969e-31	0.306444	0.99	0.951	1.37413e-26	"4"	PFDN5
7.78622e-31	0.363555	0.861	0.637	1.42854e-26	"4"	ACTR2
1.58542e-30	0.304902	0.442	0.167	2.90877e-26	"4"	TGFBI
1.96573e-30	0.320636	0.515	0.226	3.60653e-26	"4"	RILPL2
3.15461e-30	0.258758	0.383	0.137	5.78777e-26	"4"	NUMB
3.5138e-30	0.368708	0.488	0.205	6.44677e-26	"4"	UPP1
3.88704e-30	0.420669	0.667	0.359	7.13156e-26	"4"	VMP1
6.2505e-30	0.278584	0.515	0.221	1.14678e-25	"4"	CCDC88A
7.0881e-30	0.316601	0.541	0.237	1.30045e-25	"4"	NINJ1
2.27674e-29	0.489353	0.904	0.653	4.17714e-25	"4"	HLA-DRB1
4.00571e-29	0.366074	0.908	0.748	7.34927e-25	"4"	GSTP1
5.48692e-29	0.294537	0.581	0.28	1.00669e-24	"4"	RHOG
1.71619e-28	0.270364	0.515	0.223	3.1487e-24	"4"	NCOA4
3.39369e-28	0.376979	0.525	0.252	6.22641e-24	"4"	SAMSN1
3.55115e-28	0.326372	0.782	0.48	6.5153e-24	"4"	PTP4A2
1.12307e-27	0.297104	0.68	0.362	2.0605e-23	"4"	HSBP1
1.42008e-27	0.338626	0.479	0.216	2.60542e-23	"4"	MAP3K8
2.15246e-27	0.32546	0.518	0.252	3.94912e-23	"4"	METTL9
2.89821e-27	0.268121	0.446	0.184	5.31735e-23	"4"	SORL1
5.63941e-27	0.30299	0.594	0.302	1.03466e-22	"4"	GLRX
5.7264e-27	0.363348	0.584	0.305	1.05062e-22	"4"	PLEKHO1
7.05681e-27	0.304689	0.967	0.925	1.29471e-22	"4"	ARPC3
7.83315e-27	0.268922	0.521	0.244	1.43715e-22	"4"	ZNF106
9.71464e-27	0.290755	0.34	0.118	1.78234e-22	"4"	ATF5
1.28686e-26	0.255628	0.307	0.103	2.361e-22	"4"	INSIG1
2.6366e-26	0.309513	0.647	0.358	4.83737e-22	"4"	MOB1A
7.36241e-26	0.255196	0.512	0.238	1.35078e-21	"4"	GLIPR2
7.85633e-26	0.285451	0.287	0.089	1.4414e-21	"4"	CXCL2
9.2874e-26	0.370467	0.617	0.323	1.70396e-21	"4"	SOCS3
9.97357e-26	0.336486	0.71	0.425	1.82985e-21	"4"	GRB2
2.63435e-25	0.345131	0.993	0.953	4.83325e-21	"4"	GAPDH
3.52098e-25	0.305383	0.66	0.372	6.45994e-21	"4"	PPP1CB
3.80059e-25	0.7417	0.32	0.117	6.97294e-21	"4"	AREG
4.70219e-25	0.34422	0.974	0.77	8.62711e-21	"4"	CD74
7.38476e-25	0.255709	0.452	0.198	1.35488e-20	"4"	LYST
1.01572e-24	0.250228	0.696	0.374	1.86354e-20	"4"	GLUL
1.02737e-24	0.305632	0.894	0.735	1.88491e-20	"4"	ARPC5
1.05443e-24	0.378596	0.901	0.764	1.93457e-20	"4"	ARPC1B
1.34179e-24	0.275671	0.482	0.225	2.46179e-20	"4"	MAT2A
2.44089e-24	0.367618	0.842	0.647	4.47831e-20	"4"	EMP3
2.61744e-24	0.250548	0.505	0.236	4.80222e-20	"4"	DOCK2
5.58523e-24	0.297474	0.815	0.534	1.02472e-19	"4"	SDCBP
6.86019e-24	0.25825	0.455	0.206	1.25864e-19	"4"	LCP2
1.3289e-23	0.378045	0.611	0.34	2.43814e-19	"4"	LAP3
1.83691e-23	0.253047	0.584	0.296	3.37019e-19	"4"	CTNNB1
2.46719e-23	0.259957	0.446	0.199	4.52655e-19	"4"	FKBP5
2.94832e-23	0.288457	0.515	0.259	5.40928e-19	"4"	TMEM167A
4.31785e-23	0.373682	0.762	0.563	7.92195e-19	"4"	LRRFIP1
4.54991e-23	0.292626	0.406	0.18	8.34772e-19	"4"	GABARAPL1
5.97633e-23	0.297087	0.488	0.231	1.09648e-18	"4"	TNFSF10
9.93083e-23	0.278822	0.647	0.353	1.82201e-18	"4"	SMAP2
2.97871e-22	0.292684	0.62	0.361	5.46504e-18	"4"	PGLS
3.33495e-22	0.34676	0.67	0.382	6.11863e-18	"4"	IFITM3
4.4545e-22	0.273937	0.792	0.566	8.17267e-18	"4"	ATP6V0B
2.91582e-21	0.270356	0.726	0.443	5.34965e-17	"4"	PPP1R15A
3.49307e-21	0.297528	0.749	0.483	6.40874e-17	"4"	GSTO1
6.61315e-21	0.27504	0.789	0.559	1.21332e-16	"4"	PCBP1
8.54633e-21	0.298864	0.772	0.518	1.568e-16	"4"	FYB1
1.1088e-20	0.262151	0.66	0.385	2.03431e-16	"4"	RNH1
1.12362e-20	0.375972	0.838	0.674	2.0615e-16	"4"	ANXA1
1.32693e-20	0.260405	0.611	0.351	2.43451e-16	"4"	DAZAP2
3.17316e-20	0.267144	0.548	0.299	5.82179e-16	"4"	IFNGR1
7.63735e-20	0.283954	0.545	0.303	1.40122e-15	"4"	MIDN
1.05045e-19	0.259805	0.578	0.314	1.92727e-15	"4"	ADGRE5
1.17776e-19	0.289501	0.479	0.252	2.16084e-15	"4"	NFKBIZ
1.26782e-19	0.250281	0.518	0.271	2.32606e-15	"4"	BNIP3L
2.62989e-19	0.284267	0.647	0.387	4.82506e-15	"4"	NR4A2
3.45911e-19	0.259508	0.548	0.294	6.34642e-15	"4"	MYADM
4.2741e-19	0.268784	0.997	0.972	7.84168e-15	"4"	H3F3B
6.38848e-19	0.386922	0.848	0.727	1.17209e-14	"4"	S100A10
9.3732e-19	0.369225	0.957	0.856	1.7197e-14	"4"	FOS
2.55265e-18	0.254615	0.446	0.222	4.68334e-14	"4"	NABP1
3.04472e-18	0.279234	0.607	0.378	5.58615e-14	"4"	LAMTOR1
7.55631e-18	0.276263	0.739	0.533	1.38636e-13	"4"	PKM
8.83006e-18	0.259949	0.693	0.431	1.62005e-13	"4"	LSP1
1.83564e-17	0.253982	0.779	0.559	3.36786e-13	"4"	ANXA5
2.23507e-17	0.392446	0.574	0.354	4.10068e-13	"4"	SLC2A3
2.43393e-17	0.251274	0.607	0.365	4.46553e-13	"4"	DDX21
2.9992e-17	0.258802	0.756	0.568	5.50262e-13	"4"	LAMTOR4
4.10391e-16	0.381095	0.812	0.675	7.52944e-12	"4"	ZFP36
1.0261e-15	0.289322	0.347	0.165	1.88258e-11	"4"	IFI44L
2.29618e-15	0.312181	0.617	0.402	4.21279e-11	"4"	AHNAK
2.67661e-15	0.258636	0.465	0.258	4.91078e-11	"4"	CHMP1B
9.67223e-15	0.277283	0.383	0.199	1.77456e-10	"4"	SYAP1
1.33518e-13	0.273934	0.729	0.506	2.44965e-09	"4"	MARCKS
1.10795e-12	0.326266	0.36	0.197	2.03275e-08	"4"	GBP1
4.80496e-10	0.393666	0.746	0.648	8.81566e-06	"4"	HLA-DPA1
3.93437e-09	0.256495	0.356	0.216	7.2184e-05	"4"	MX1
1.68562e-08	0.264138	0.439	0.29	0.000309261	"4"	GPR183
1.80308e-07	0.307623	0.667	0.598	0.00330812	"4"	ZFP36L1
3.62475e-07	0.39159	0.419	0.268	0.00665034	"4"	HSPA1A
6.62811e-06	0.298834	0.716	0.646	0.121606	"4"	HLA-DPB1
0	0.867784	0.481	0.008	0	"5"	KLRF1
2.64846e-269	1.03023	0.529	0.02	4.85912e-265	"5"	TRDC
1.55317e-231	1.26983	0.709	0.076	2.84959e-227	"5"	KLRD1
3.29936e-226	2.6019	0.661	0.066	6.05333e-222	"5"	GNLY
1.84381e-225	1.02272	0.478	0.023	3.38283e-221	"5"	KLRC1
1.63282e-211	1.3258	0.747	0.103	2.99574e-207	"5"	CTSW
4.55597e-161	1.3924	0.619	0.091	8.35884e-157	"5"	PRF1
7.44193e-150	1.89785	0.834	0.218	1.36537e-145	"5"	NKG7
3.59872e-148	1.59893	0.543	0.072	6.60257e-144	"5"	GZMB
2.05063e-142	0.782277	0.567	0.082	3.76229e-138	"5"	IL2RB
5.5881e-135	1.15599	0.619	0.101	1.02525e-130	"5"	KLRB1
3.6576e-133	1.05259	0.37	0.03	6.71061e-129	"5"	FGFBP2
1.88723e-129	1.16436	0.751	0.195	3.4625e-125	"5"	CD7
4.30576e-126	0.963797	0.626	0.12	7.89977e-122	"5"	HOPX
7.36218e-122	0.372962	0.325	0.024	1.35074e-117	"5"	PTGDR
3.29878e-117	0.924073	0.412	0.047	6.05227e-113	"5"	XCL2
3.85483e-109	0.93018	0.464	0.07	7.07245e-105	"5"	CLIC3
1.89307e-93	1.10914	0.685	0.205	3.47322e-89	"5"	CST7
1.69365e-91	0.642126	0.253	0.019	3.10734e-87	"5"	XCL1
1.53457e-88	0.959567	0.609	0.172	2.81548e-84	"5"	CD247
1.57856e-83	0.360855	0.325	0.041	2.89619e-79	"5"	TXK
8.10302e-82	1.01456	0.772	0.249	1.48666e-77	"5"	CCL5
1.87202e-80	0.520541	0.46	0.093	3.4346e-76	"5"	MATK
3.587e-79	0.337435	0.308	0.038	6.58107e-75	"5"	NCR3
1.3345e-76	0.499889	0.318	0.044	2.44841e-72	"5"	ADGRG1
1.26712e-72	1.09079	0.671	0.217	2.32478e-68	"5"	GZMA
5.4258e-72	0.891448	0.913	0.615	9.95471e-68	"5"	HCST
5.9793e-72	1.03579	0.391	0.077	1.09702e-67	"5"	SPON2
7.41147e-58	0.683066	0.561	0.189	1.35978e-53	"5"	PLAC8
2.61811e-55	0.455358	0.294	0.053	4.80344e-51	"5"	CX3CR1
1.34316e-50	0.395044	0.37	0.09	2.46429e-46	"5"	PYHIN1
3.43907e-50	0.565746	0.516	0.173	6.30966e-46	"5"	GZMM
1.97705e-48	0.847792	0.481	0.174	3.62729e-44	"5"	CMC1
8.60645e-46	0.28013	0.26	0.049	1.57902e-41	"5"	TTC38
1.03346e-45	1.1643	0.616	0.245	1.89609e-41	"5"	CCL4
2.8873e-43	0.378449	0.426	0.128	5.29732e-39	"5"	SAMD3
3.50818e-43	0.301465	0.311	0.073	6.43646e-39	"5"	SH2D2A
5.06316e-43	0.538238	0.547	0.216	9.28937e-39	"5"	APOBEC3G
2.01275e-42	0.579882	0.412	0.118	3.69279e-38	"5"	GZMH
2.95528e-42	0.312206	0.325	0.08	5.42205e-38	"5"	SYTL3
1.86264e-41	0.337508	0.398	0.118	3.41739e-37	"5"	PTPN4
2.75179e-40	0.50026	0.574	0.244	5.0487e-36	"5"	RUNX3
9.7701e-38	0.286334	0.308	0.079	1.79252e-33	"5"	ZAP70
1.126e-37	0.544017	0.702	0.392	2.06588e-33	"5"	EVL
8.16756e-35	0.297807	0.294	0.079	1.4985e-30	"5"	CHST2
6.27477e-33	0.321567	0.388	0.135	1.15123e-28	"5"	CHST12
1.93863e-31	0.442209	0.567	0.283	3.55681e-27	"5"	MBP
5.31786e-31	0.572629	0.578	0.315	9.75668e-27	"5"	ABHD17A
2.33506e-29	0.259356	0.311	0.097	4.28414e-25	"5"	CD38
1.11328e-28	0.509593	0.685	0.402	2.04253e-24	"5"	IRF1
1.24593e-28	0.476794	0.612	0.325	2.28591e-24	"5"	RARRES3
8.70743e-28	0.35784	0.495	0.23	1.59755e-23	"5"	TBC1D10C
4.27412e-26	0.319343	0.391	0.161	7.84173e-22	"5"	APMAP
1.15962e-24	0.326406	1	0.997	2.12756e-20	"5"	HLA-B
2.17392e-24	0.461234	0.651	0.341	3.98849e-20	"5"	CD69
4.01649e-24	0.255758	0.343	0.129	7.36906e-20	"5"	DENND2D
4.13176e-24	0.413507	0.55	0.303	7.58054e-20	"5"	CDC42SE1
6.57276e-24	0.626435	0.602	0.342	1.2059e-19	"5"	DUSP2
6.77939e-24	0.373362	0.948	0.893	1.24381e-19	"5"	MYL12A
5.25322e-23	0.298688	0.391	0.165	9.63808e-19	"5"	PTPN7
7.3439e-23	0.452474	0.647	0.417	1.34739e-18	"5"	RAC2
9.5246e-23	0.274661	1	0.994	1.74748e-18	"5"	HLA-A
3.64422e-22	0.471784	0.415	0.186	6.68605e-18	"5"	FCGR3A
6.04338e-22	0.343505	0.405	0.186	1.10878e-17	"5"	SPN
7.0076e-22	0.402009	0.785	0.568	1.28569e-17	"5"	ARL4C
2.6341e-21	0.316387	0.394	0.173	4.83279e-17	"5"	C12orf75
3.94489e-21	0.25176	0.36	0.15	7.23769e-17	"5"	PTPN22
6.36574e-21	0.251567	0.398	0.174	1.16792e-16	"5"	CCND2
7.59512e-21	0.502586	0.682	0.475	1.39348e-16	"5"	EFHD2
1.02235e-20	0.341145	0.481	0.259	1.8757e-16	"5"	PAXX
2.57715e-20	0.300282	0.439	0.218	4.7283e-16	"5"	BTN3A2
9.67145e-20	0.363674	0.336	0.135	1.77442e-15	"5"	LINC01871
1.52468e-19	0.302137	0.433	0.219	2.79732e-15	"5"	PIP4K2A
8.59914e-19	0.274444	0.775	0.477	1.57769e-14	"5"	FCER1G
1.15831e-18	0.30296	0.522	0.283	2.12514e-14	"5"	ACAP1
1.80705e-18	0.45431	0.858	0.712	3.31539e-14	"5"	IER2
2.91345e-18	0.343849	0.948	0.913	5.3453e-14	"5"	CALM1
1.41462e-17	0.359605	0.893	0.822	2.59541e-13	"5"	BTG1
2.48398e-17	0.258682	0.401	0.199	4.55735e-13	"5"	AKNA
3.39687e-17	0.374602	0.626	0.434	6.23223e-13	"5"	JAK1
5.17683e-17	0.269032	0.429	0.226	9.49793e-13	"5"	BIN2
1.27488e-16	0.268442	0.948	0.883	2.33902e-12	"5"	UBB
1.83554e-16	0.26174	0.322	0.147	3.36766e-12	"5"	ARHGAP9
3.26523e-16	0.346906	0.374	0.192	5.99073e-12	"5"	C1orf56
3.36142e-16	0.320095	0.533	0.319	6.16719e-12	"5"	ADGRE5
4.15175e-16	0.284234	0.765	0.585	7.61721e-12	"5"	RAP1B
6.75591e-16	0.314381	0.779	0.584	1.23951e-11	"5"	CORO1A
7.92095e-16	0.331152	0.855	0.702	1.45326e-11	"5"	ZFP36L2
1.68438e-15	0.297994	0.869	0.736	3.09034e-11	"5"	SRSF5
2.06862e-15	0.262183	0.495	0.287	3.79529e-11	"5"	ATM
3.29688e-15	0.460213	0.692	0.523	6.04878e-11	"5"	IL32
3.33235e-15	0.268764	0.401	0.216	6.11387e-11	"5"	CCND3
4.40119e-15	0.302718	0.419	0.226	8.07486e-11	"5"	METRNL
1.39763e-14	0.294172	0.588	0.405	2.56423e-10	"5"	TGFB1
3.83521e-14	0.306233	0.754	0.655	7.03646e-10	"5"	SEPT7
8.23524e-14	0.349225	0.273	0.122	1.51092e-09	"5"	AREG
1.34084e-13	0.269684	0.976	0.928	2.46004e-09	"5"	PFN1
8.00675e-13	0.401495	0.734	0.616	1.469e-08	"5"	TXNIP
1.09618e-12	0.309862	0.498	0.312	2.01116e-08	"5"	STK17A
1.31441e-12	0.275683	0.63	0.434	2.41155e-08	"5"	LIMD2
2.00389e-12	0.278888	0.529	0.334	3.67654e-08	"5"	ID2
3.09473e-12	0.292895	0.574	0.405	5.67791e-08	"5"	CLEC2B
9.65461e-12	0.286674	0.965	0.927	1.77133e-07	"5"	JUND
1.6884e-11	0.324651	0.678	0.545	3.09771e-07	"5"	AES
1.91455e-11	0.319201	0.637	0.516	3.51262e-07	"5"	EIF3G
4.99894e-11	0.256321	0.464	0.287	9.17155e-07	"5"	PIK3R1
2.15056e-09	0.264625	0.533	0.391	3.94563e-05	"5"	CD47
1.87179e-07	0.270997	0.547	0.396	0.00343418	"5"	NR4A2
2.04258e-06	0.252868	0.439	0.312	0.0374753	"5"	PLEK
8.0757e-05	0.483702	0.332	0.233	1	"5"	CCL3
0.00184007	0.35658	0.696	0.677	1	"5"	NFKBIA
0	2.29894	0.709	0.011	0	"6"	VWF
0	1.96054	0.684	0.009	0	"6"	CLDN5
0	1.86547	0.526	0.009	0	"6"	PLVAP
0	1.78246	0.807	0.025	0	"6"	RAMP2
0	1.78174	0.765	0.026	0	"6"	EGFL7
0	1.47694	0.667	0.009	0	"6"	CLEC14A
0	1.35068	0.653	0.01	0	"6"	SOX18
0	1.33307	0.554	0.01	0	"6"	RAMP3
0	1.31864	0.561	0.015	0	"6"	AQP1
0	1.27431	0.691	0.039	0	"6"	SLC9A3R2
0	1.24208	0.628	0.016	0	"6"	CALCRL
0	1.20469	0.695	0.007	0	"6"	CDH5
0	1.20064	0.698	0.018	0	"6"	TM4SF1
0	1.14313	0.66	0.028	0	"6"	ESAM
0	1.05379	0.533	0.006	0	"6"	ADGRL4
0	1.00395	0.6	0.012	0	"6"	PODXL
0	0.996026	0.523	0.009	0	"6"	PTPRB
0	0.936988	0.54	0.012	0	"6"	NOTCH4
0	0.92329	0.632	0.013	0	"6"	ECSCR
0	0.919049	0.568	0.005	0	"6"	EMCN
0	0.843627	0.53	0.007	0	"6"	MMRN2
0	0.812612	0.47	0.005	0	"6"	KDR
0	0.793794	0.505	0.007	0	"6"	ROBO4
0	0.703355	0.428	0.002	0	"6"	SEMA3F
0	0.638775	0.456	0.005	0	"6"	PALMD
1.35884e-307	0.58964	0.498	0.01	2.49307e-303	"6"	RASIP1
4.34503e-305	0.591163	0.495	0.01	7.97183e-301	"6"	TIE1
3.88683e-304	0.965871	0.404	0.001	7.13117e-300	"6"	SLCO2A1
4.82059e-301	1.58096	0.6	0.027	8.84434e-297	"6"	FLT1
3.79737e-299	1.69433	0.758	0.061	6.96703e-295	"6"	GNG11
1.04601e-294	0.99413	0.54	0.019	1.91912e-290	"6"	PCDH17
6.97743e-285	0.932584	0.582	0.027	1.28015e-280	"6"	BCAM
1.74422e-279	1.2963	0.502	0.016	3.20013e-275	"6"	VWA1
5.64663e-275	1.50728	0.758	0.074	1.03599e-270	"6"	HYAL2
1.47583e-272	0.676514	0.393	0.004	2.70771e-268	"6"	FAM167B
1.97273e-271	0.529575	0.421	0.007	3.61936e-267	"6"	SHANK3
6.16897e-267	0.57862	0.414	0.007	1.13182e-262	"6"	CXorf36
5.15235e-266	0.962889	0.498	0.017	9.45301e-262	"6"	CD34
2.18232e-265	0.759945	0.516	0.021	4.00391e-261	"6"	LDB2
1.45545e-263	0.655857	0.411	0.007	2.67032e-259	"6"	EFNA1
4.37862e-256	0.508194	0.382	0.005	8.03346e-252	"6"	CYYR1
1.75301e-253	0.772156	0.477	0.016	3.21624e-249	"6"	CAVIN2
7.59748e-253	1.93246	0.625	0.047	1.39391e-248	"6"	HSPG2
2.52912e-252	1.02889	0.66	0.053	4.64017e-248	"6"	ARHGAP29
6.07867e-241	0.417494	0.375	0.006	1.11525e-236	"6"	MYCT1
6.19666e-240	0.504038	0.337	0.003	1.1369e-235	"6"	NOSTRIN
1.05438e-239	0.712012	0.551	0.031	1.93447e-235	"6"	S100A16
5.91054e-235	1.3367	0.702	0.076	1.08441e-230	"6"	EPAS1
9.85437e-232	1.39366	0.674	0.061	1.80798e-227	"6"	CAV1
1.68599e-231	0.662389	0.368	0.007	3.09329e-227	"6"	TM4SF18
3.68692e-228	0.645578	0.488	0.024	6.76439e-224	"6"	RAPGEF5
1.34088e-227	0.658311	0.481	0.023	2.46012e-223	"6"	WWTR1
1.62341e-222	0.460835	0.309	0.002	2.97847e-218	"6"	BTNL9
2.07389e-222	1.07084	0.33	0.004	3.80496e-218	"6"	STC1
2.87101e-222	1.75367	0.604	0.053	5.26745e-218	"6"	ID1
2.02921e-221	0.89524	0.46	0.021	3.723e-217	"6"	EFNB2
2.4731e-221	0.52339	0.425	0.015	4.5374e-217	"6"	KANK3
9.61745e-221	0.588385	0.358	0.007	1.76451e-216	"6"	PCDH12
5.58398e-220	0.453792	0.347	0.006	1.02449e-215	"6"	GALNT18
1.11144e-217	0.852317	0.6	0.049	2.03917e-213	"6"	NFIB
3.48069e-217	1.21783	0.709	0.088	6.38602e-213	"6"	NPDC1
3.38202e-216	0.765332	0.47	0.023	6.20499e-212	"6"	TCIM
7.8273e-216	0.391238	0.33	0.005	1.43607e-211	"6"	PCAT19
3.24344e-215	0.46281	0.361	0.008	5.95074e-211	"6"	JAG2
6.80752e-214	0.41608	0.351	0.007	1.24898e-209	"6"	PREX2
2.33935e-212	1.6132	0.895	0.142	4.292e-208	"6"	IGFBP7
1.62401e-211	0.857614	0.625	0.061	2.97957e-207	"6"	ACVRL1
4.28832e-210	0.82106	0.305	0.003	7.86778e-206	"6"	APLNR
8.97379e-209	0.415111	0.295	0.002	1.64642e-204	"6"	TEK
3.21365e-208	0.490576	0.347	0.008	5.89608e-204	"6"	JAM2
5.25001e-208	0.541713	0.309	0.004	9.63219e-204	"6"	DLL4
8.9456e-208	0.459986	0.407	0.015	1.64125e-203	"6"	TMEM255B
1.22885e-207	0.489742	0.389	0.013	2.25457e-203	"6"	FZD4
1.76257e-206	1.12628	0.726	0.089	3.23379e-202	"6"	IGFBP4
4.58083e-203	0.460265	0.284	0.002	8.40445e-199	"6"	CX3CL1
9.30429e-202	0.411944	0.298	0.003	1.70706e-197	"6"	SMAD6
2.20708e-198	0.514848	0.368	0.012	4.04933e-194	"6"	ADGRL2
1.13752e-197	0.493126	0.347	0.009	2.08701e-193	"6"	HECW2
1.91757e-197	0.369816	0.267	0.001	3.51816e-193	"6"	SOX7
5.04198e-197	0.48769	0.442	0.023	9.25053e-193	"6"	PTPRM
6.91277e-197	1.69219	0.695	0.08	1.26829e-192	"6"	COL4A1
3.40529e-196	0.379514	0.319	0.006	6.24769e-192	"6"	AFAP1L1
1.4053e-195	0.452551	0.354	0.011	2.57831e-191	"6"	PLXNA2
2.76762e-195	1.32836	0.758	0.127	5.07775e-191	"6"	APP
3.17027e-195	0.903868	0.372	0.013	5.81649e-191	"6"	GJA1
2.01567e-193	1.00691	0.663	0.081	3.69814e-189	"6"	CRIP2
3.008e-192	0.31535	0.277	0.003	5.51877e-188	"6"	BCL6B
5.00414e-192	0.36069	0.277	0.003	9.18109e-188	"6"	MECOM
6.14375e-192	1.47137	0.302	0.005	1.12719e-187	"6"	ESM1
4.37218e-189	0.781104	0.54	0.046	8.02163e-185	"6"	ADGRF5
1.74746e-188	0.476943	0.442	0.026	3.20606e-184	"6"	DOCK6
2.40258e-188	0.406371	0.361	0.013	4.40802e-184	"6"	DCHS1
1.94064e-187	0.87542	0.628	0.068	3.5605e-183	"6"	CAVIN1
4.93923e-183	2.0406	0.333	0.01	9.06201e-179	"6"	IGFBP3
4.88945e-181	1.56248	0.596	0.063	8.97068e-177	"6"	SPARCL1
1.04136e-180	0.398452	0.323	0.009	1.91059e-176	"6"	JCAD
1.19285e-178	0.875807	0.537	0.052	2.18852e-174	"6"	HEG1
4.18148e-177	0.360283	0.302	0.007	7.67176e-173	"6"	FAM69B
5.74925e-177	0.382283	0.316	0.009	1.05482e-172	"6"	TSPAN12
2.35097e-176	0.451883	0.358	0.015	4.31333e-172	"6"	TSPAN18
1.13713e-175	1.50046	0.73	0.136	2.08629e-171	"6"	ENG
6.64591e-175	0.405298	0.351	0.014	1.21933e-170	"6"	ADCY4
1.18098e-174	1.24094	0.67	0.103	2.16675e-170	"6"	CD93
1.54114e-174	1.50711	0.754	0.155	2.82753e-170	"6"	PECAM1
5.12854e-174	0.476209	0.326	0.011	9.40933e-170	"6"	GRB10
4.15356e-173	0.284544	0.253	0.003	7.62054e-169	"6"	ARHGEF15
1.31435e-172	0.462658	0.323	0.011	2.41143e-168	"6"	ITGA2
2.92411e-171	0.357056	0.288	0.006	5.36487e-167	"6"	FLT4
3.4997e-171	0.33147	0.33	0.012	6.4209e-167	"6"	NOVA2
2.58579e-168	0.337346	0.295	0.008	4.74415e-164	"6"	ERG
6.76347e-168	0.402597	0.323	0.011	1.24089e-163	"6"	CASKIN2
2.2294e-166	1.50782	0.46	0.039	4.09028e-162	"6"	INSR
3.96097e-166	1.34743	0.653	0.085	7.2672e-162	"6"	COL4A2
2.49592e-164	1.10913	0.551	0.058	4.57926e-160	"6"	MCAM
5.84676e-163	0.460679	0.361	0.018	1.0727e-158	"6"	SNCG
6.43012e-163	0.285465	0.26	0.005	1.17973e-158	"6"	SHROOM4
4.49331e-161	1.07372	0.607	0.077	8.24388e-157	"6"	TIMP3
9.4169e-161	0.536252	0.442	0.035	1.72772e-156	"6"	DOCK9
3.59872e-159	0.808367	0.344	0.017	6.60257e-155	"6"	COL15A1
4.13958e-159	1.14662	0.519	0.056	7.59488e-155	"6"	HTRA1
1.58985e-156	0.383415	0.274	0.007	2.91689e-152	"6"	MPZL2
5.35839e-156	0.327413	0.256	0.005	9.83104e-152	"6"	SPNS2
5.7094e-156	0.75748	0.477	0.046	1.0475e-151	"6"	ITGA6
4.70916e-155	0.434122	0.393	0.026	8.63989e-151	"6"	SCARF1
4.92828e-155	1.95101	0.789	0.184	9.04192e-151	"6"	IFI27
5.32818e-155	0.418036	0.26	0.006	9.77561e-151	"6"	VEGFC
1.29309e-154	0.503082	0.463	0.041	2.37243e-150	"6"	TJP1
2.44079e-153	0.632683	0.491	0.048	4.47813e-149	"6"	CAV2
3.68647e-151	0.610255	0.295	0.011	6.76356e-147	"6"	CLEC3B
3.11827e-150	0.761415	0.309	0.013	5.72108e-146	"6"	LIFR
1.10065e-149	0.916709	0.589	0.084	2.01937e-145	"6"	EMP2
1.22974e-149	0.387011	0.274	0.008	2.25621e-145	"6"	HEY1
6.86905e-149	0.810318	0.53	0.063	1.26026e-144	"6"	EMP1
8.81674e-149	0.489406	0.396	0.029	1.61761e-144	"6"	PTPRG
2.48237e-148	0.372889	0.291	0.011	4.5544e-144	"6"	EPHB4
5.36851e-148	0.366557	0.288	0.01	9.8496e-144	"6"	NRN1
1.22661e-147	0.672195	0.372	0.025	2.25045e-143	"6"	UNC5B
1.16931e-143	0.864515	0.379	0.027	2.14534e-139	"6"	ACKR3
5.58232e-143	0.29137	0.256	0.007	1.02419e-138	"6"	NPR1
1.16261e-140	0.270938	0.26	0.008	2.13304e-136	"6"	FGD5
1.51642e-140	0.947881	0.516	0.063	2.78217e-136	"6"	LAMA4
4.28733e-140	0.282843	0.302	0.014	7.86597e-136	"6"	ARAP3
4.42532e-139	1.40241	0.691	0.139	8.11913e-135	"6"	ID3
5.24858e-139	0.627964	0.34	0.022	9.62957e-135	"6"	PDGFB
1.67246e-138	0.660657	0.667	0.101	3.06847e-134	"6"	RNASE1
2.87541e-135	0.3074	0.256	0.009	5.27551e-131	"6"	SHE
3.74446e-134	0.552177	0.481	0.057	6.86996e-130	"6"	PON2
4.33964e-134	1.5782	0.744	0.163	7.96194e-130	"6"	SPARC
3.93947e-133	0.614264	0.582	0.084	7.22774e-129	"6"	CNN3
4.34922e-133	0.413459	0.393	0.033	7.97952e-129	"6"	TNS2
2.03667e-131	0.746305	0.551	0.079	3.73667e-127	"6"	SERPINH1
1.24812e-129	0.810358	0.551	0.088	2.28992e-125	"6"	ITGA5
4.98297e-129	0.713391	0.533	0.081	9.14225e-125	"6"	BMPR2
5.6041e-129	0.345741	0.302	0.017	1.02818e-124	"6"	TSPAN9
5.15015e-128	0.550397	0.396	0.037	9.44899e-124	"6"	AGRN
1.32017e-127	0.325037	0.27	0.012	2.42211e-123	"6"	SEMA6A
1.55884e-127	0.354867	0.298	0.017	2.86001e-123	"6"	MYO10
1.5285e-125	0.425237	0.305	0.019	2.80434e-121	"6"	SPRY4
4.97926e-125	0.472189	0.453	0.051	9.13546e-121	"6"	PPFIBP1
1.06548e-124	0.427756	0.347	0.027	1.95484e-120	"6"	MYO6
8.79165e-124	0.69243	0.432	0.05	1.613e-119	"6"	ADAM15
1.67497e-123	0.775359	0.453	0.055	3.07307e-119	"6"	PLPP1
7.6525e-123	0.356323	0.312	0.021	1.404e-118	"6"	MAGI1
8.64441e-123	0.801596	0.477	0.064	1.58599e-118	"6"	PLPP3
9.62806e-123	0.291896	0.295	0.017	1.76646e-118	"6"	RHOJ
2.45124e-122	0.984289	0.705	0.178	4.49729e-118	"6"	SPTBN1
8.07851e-121	0.496669	0.467	0.059	1.48217e-116	"6"	LAMB2
2.78905e-119	1.37068	0.744	0.195	5.11707e-115	"6"	A2M
1.02719e-118	0.437217	0.281	0.016	1.88459e-114	"6"	NUAK1
5.1562e-118	0.338626	0.291	0.018	9.46008e-114	"6"	SYNPO
7.12967e-118	0.680265	0.389	0.041	1.30808e-113	"6"	ACE
4.84116e-116	0.357108	0.26	0.013	8.88208e-112	"6"	ADAMTS9
2.5761e-115	0.34426	0.309	0.022	4.72638e-111	"6"	JAM3
3.54909e-115	0.636624	0.425	0.051	6.51151e-111	"6"	CRIM1
2.82309e-114	0.427233	0.396	0.043	5.17953e-110	"6"	FKBP9
4.17245e-114	0.311925	0.277	0.017	7.65519e-110	"6"	PTPN14
5.44572e-114	0.435556	0.382	0.039	9.99127e-110	"6"	IL3RA
1.44483e-112	0.272934	0.26	0.014	2.65083e-108	"6"	PCDH1
2.54253e-112	0.391746	0.312	0.024	4.66479e-108	"6"	LIMS2
2.98101e-112	0.759203	0.467	0.065	5.46925e-108	"6"	TGM2
5.65354e-112	0.732734	0.425	0.053	1.03726e-107	"6"	PXDN
7.37684e-112	0.384515	0.316	0.025	1.35343e-107	"6"	PIK3R3
1.2963e-111	0.838398	0.54	0.097	2.37833e-107	"6"	NRP1
2.3576e-111	0.362304	0.33	0.028	4.32549e-107	"6"	TSPAN7
2.98742e-111	0.397477	0.396	0.045	5.48102e-107	"6"	NCKAP1
6.02111e-111	0.450844	0.284	0.019	1.10469e-106	"6"	CDH13
4.33034e-107	0.62279	0.453	0.065	7.94487e-103	"6"	TMEM204
2.55556e-106	0.349008	0.295	0.023	4.68869e-102	"6"	CMTM8
2.75254e-105	0.696992	0.453	0.065	5.05009e-101	"6"	TFPI
2.28603e-102	0.393457	0.368	0.042	4.19419e-98	"6"	AFDN
3.4444e-102	0.294068	0.295	0.023	6.31944e-98	"6"	LAMA5
1.6695e-101	0.727719	0.572	0.115	3.06303e-97	"6"	PDLIM1
9.69969e-101	0.321057	0.589	0.101	1.7796e-96	"6"	CALD1
4.67179e-100	0.279235	0.256	0.017	8.57134e-96	"6"	LIMCH1
5.18915e-100	0.451453	0.368	0.044	9.52053e-96	"6"	JUP
6.3506e-100	0.610293	0.354	0.04	1.16514e-95	"6"	MMP2
4.85027e-99	0.449827	0.256	0.017	8.8988e-95	"6"	ANGPTL2
1.12244e-98	0.387116	0.288	0.024	2.05935e-94	"6"	TMEM88
1.82938e-98	0.337746	0.323	0.031	3.35636e-94	"6"	CDC42EP5
2.26026e-98	0.296416	0.256	0.017	4.14689e-94	"6"	PKP4
6.34336e-98	1.05	0.909	0.364	1.16382e-93	"6"	IFITM3
3.29796e-97	0.468989	0.372	0.047	6.05077e-93	"6"	MTUS1
8.95304e-97	1.03877	0.495	0.082	1.64261e-92	"6"	MGP
2.36491e-95	0.488428	0.47	0.076	4.3389e-91	"6"	S100A13
4.00428e-95	0.677233	0.449	0.075	7.34666e-91	"6"	F2R
8.66747e-95	0.366174	0.312	0.031	1.59022e-90	"6"	RAI14
1.01226e-94	0.941403	0.723	0.23	1.8572e-90	"6"	CD59
2.06668e-94	0.428588	0.453	0.07	3.79173e-90	"6"	COX7A1
4.5632e-93	0.650098	0.544	0.12	8.3721e-89	"6"	PLXND1
1.27623e-92	0.505797	0.354	0.044	2.34149e-88	"6"	PLK2
[truncated: 4,721 more rows]

## Sheet: Suppl Table 5
Supplementary Table 5: Filtering of cells with high quality data for the 3 TH-MYCN tumors
			Quality filters				Summary after filtering
Samples	nCells	global ambient mRNA contamination fraction	nDoublets	Coverage thresholds	minimum nGenes	%MT	nCells	%cells kept	median Cov	median nGenes
MYCN-sc42369	3068	0.04	8	[393, 40994]	228	0.2	1914	0.62	3158	1388.5
MYCN-sc41884	4308	0.09	19	[821, 17719]	517	0.2	1221	0.28	1113	758
MYCN-sc42007	5811	0.22	227	[743, 8216]	451	0.2	2515	0.43	1107	747

## Sheet: Suppl Table 6
Supplementary Table 6: Filtering of cells with high quality data for the 10 neuroblastoma biopsies.
			Quality filters				Summary after filtering
Samples	nCells	global ambient mRNA contamination fraction	nDoublets	Coverage thresholds	minimum nGenes	%MT	nCells	%cells kept	median Cov	median nGenes
TD2	3301	0.1166	388	[436, 24884]	258	0.2	1306	0.395638	895.5	589.5
TD3	936	0.0079	91	[501, 58534]	242	0.2	768	0.820513	9177	3482
TD4	1725	0.01	43	[453, 27085]	283	0.2	1357	0.786667	2982	1544
TD5	2763	0.0117	129	[456, 88424]	301	0.2	2258	0.817228	11940	3996
TD6	3580	0.07	151	[461, 51657]	345	0.2	3274	0.914525	7236.5	2946.5
TR2	4614	0.01	584	[417, 36140]	316	0.2	2518	0.54573	6926	2857.5
TR3	3183	0.0172	111	[426, 89556]	290	0.2	2571	0.807729	2733	1338
TR4	10990	0.0027	206	[862, 46143]	501	0.2	2407	0.219017	2398	1263
TR5	1434	0.0087	50	[424, 104973]	265	0.2	1318	0.919107	4410.5	1989
TR6	3715	0.0114	220	[394, 123516]	217	0.2	2519	0.678062	7071	2845

## Sheet: Suppl Table 7
Supplementary Table 7: Antibodies used in the various panels to characterize immune cells and CAFs of the TH-MYCN tumors by FACS.
	Antibody	Dilution	Compagny	Catalogue number	Clone	Species
Panel for lymphoid cells	CD45-APC Cy7	1:50	BD Biosciences	561037	30-F11	Rat
	CD3e-CF594	1:50	BD Biosciences	562332	145-2C11	Armenian hamster
	CD19 - PE Cy5	1:50	Biolegend	115510	6D5	Rat
Panel for MDSCs	CD45-APC Cy7	1:50	BD Biosciences	561037	30-F11	Rat
	Ly6G - PECy7	1:50	Biolegend	1A8	127617	Rat
	Ly6C- Alexa700	1:50	Biolegend	128024	HK1.4	Rat
	CD11b BB515	1:50	BD Biosciences	564454	m1/70	Rat
Panel for CAFs	CD45-APC Cy7	1:50	BD Biosciences	561037	30-F11	Rat
	CD31 PE	1:50	Biolegend	102408	390	Rat
	GD2 APC	1:50	Biolegend	357306	14G2a	Mouse
	APC isotype control	1:50	Biolegend	400221	MOPC-173	Mouse
	PDPN - Alexa 488	1:50	Biolegend	127406	8.1.1	Syrian Hamster
	Alexa 488 Syriam Hamster IgG control	1:50	Biolegend	40218	SHG-1	Syrian Hamster
	MCAM -PE Cy7	1:50	Biolegend	134714	ME-9F1	Rat
	PE Cy7 Rat IgG2a control	1:50	Biolegend	400522	RTK2758	Rat
Panel for T cells	CD4-eF450	1:100	Biolegend	100544	RM4-5	Rat
	CD8-APC	1:1600	BD Biosciences	553035	53-6.7	Rat
	CD279 (PD1)-PC7	1:100	Biolegend	135216	29F.1A12	Rat
	CD152 (CTLA4)-AF700	1:100	BD Biosciences	565778	UC10-4F10-11	Armenian hamster
	TIGIT-PE	1:100	Biolegend	142103	1G9	mouse
	CD223 (LAG-3)-PerCP-eF710	1:800	Thermo Fisher Scientific	46-2231-82	C9B7W	Rat
